# Supplementary material for: Linking Human Diseases to Animal Models Using Ontology-Based Phenotype Annotation
Source: PLoS Biol. 2009 Nov 24;7(11):e1000247. doi: 10.1371/journal.pbio.1000247 (PMC2774506; doi:10.1371/journal.pbio.1000247)
Supplement: Table S2 — Comparison between human ATP2A1 and zebrafish genes. The top 250 genes (by simJ) are reported, together with the rank and score for each metric (simIC, simJ, avgICCS, and maxIC). Additionally, the maxIC phenotype is reported using ontology identifiers. See Materials and Methods for a list of ontology prefixes. Known sequence orthologs are highlighted in yellow and listed in Table 6, if present. Genes at rank 1 are listed in Table 7. (0.08 MB XLS) [file pbio.1000247.s002.xls]

## Sheet: NCBI_Gene_487-vs-allg-allscores
zfin gene id	zfin gene name	simIC rank	simIC	simJ rank	simJ	avgICCS rank	avgICCS	maxIC rank	maxIC	maxIC phenotype
ZFIN:ZDB-GENE-070705-417	ryr1b	1	0.125756	1	0.178423	1	9.7263	1	12.7338	[GO:0005215, GO:0008324, GO:0015075, GO:0022857, GO:0022891, GO:0022892, GO:0046873]
ZFIN:ZDB-GENE-060503-416	slc17a8	2	0.0434917	57	0.112211	60	2.14383	2	5.96557	[GO:0005737]
ZFIN:ZDB-GENE-040426-2784	sass6	3	0.0393507	40	0.121212	6	2.61669	2	5.96557	[GO:0005737]
ZFIN:ZDB-GENE-021115-2	trpm7	4	0.0387286	174	0.0957096	80	2.02728	2	5.96557	[GO:0005737]
ZFIN:ZDB-GENE-070514-1	dry	5	0.0373037	97	0.104225	4	2.79258	2	5.96557	[GO:0005737]
ZFIN:ZDB-GENE-030318-2	chm	6	0.0346615	123	0.0977011	59	2.15183	2	5.96557	[GO:0005737]
ZFIN:ZDB-GENE-070117-2366	slw	7	0.0328765	2	0.161017	3	2.80959	65	2.95158	[PATO:0001997]
ZFIN:ZDB-GENE-020419-34	dtl	8	0.0322631	94	0.10582	5	2.68485	9	5.1946	[GO:0005622]
ZFIN:ZDB-GENE-990415-94	hsp90a.1	9	0.0317492	96	0.104693	81	1.985	2	5.96557	[GO:0005737]
ZFIN:ZDB-GENE-070117-1588	unm ti230x	10	0.0290633	26	0.136752	78	2.07717	65	2.95158	[PATO:0001997]
ZFIN:ZDB-GENE-070117-2342	sne	11	0.0278808	31	0.134328	82	1.97321	65	2.95158	[PATO:0001997]
ZFIN:ZDB-GENE-070117-2056	fap	11	0.0278808	31	0.134328	82	1.97321	65	2.95158	[PATO:0001997]
ZFIN:ZDB-GENE-070117-2030	dus	11	0.0278808	31	0.134328	82	1.97321	65	2.95158	[PATO:0001997]
ZFIN:ZDB-GENE-070117-2503	buf	11	0.0278808	31	0.134328	91	1.78932	65	2.95158	[PATO:0001997]
ZFIN:ZDB-GENE-070117-2395	sth	15	0.0276443	39	0.124138	91	1.78932	65	2.95158	[PATO:0001997]
ZFIN:ZDB-GENE-030313-1	rapsn	16	0.0275645	35	0.130435	190	1.62204	65	2.95158	[PATO:0001997]
ZFIN:ZDB-GENE-070117-274	unm tu238	17	0.0275029	113	0.100478	9	2.45077	11	4.19848	[PATO:0000762]
ZFIN:ZDB-GENE-070117-2368	slm	18	0.0272787	25	0.137405	79	2.07231	65	2.95158	[PATO:0001997]
ZFIN:ZDB-GENE-070117-569	unm tk64	19	0.0270652	5	0.144231	62	2.09461	65	2.95158	[PATO:0001997]
ZFIN:ZDB-GENE-070117-548	unm tg280d	19	0.0270652	5	0.144231	62	2.09461	65	2.95158	[PATO:0001997]
ZFIN:ZDB-GENE-070117-527	unm tt215	19	0.0270652	5	0.144231	62	2.09461	65	2.95158	[PATO:0001997]
ZFIN:ZDB-GENE-070117-513	unm ty204	19	0.0270652	5	0.144231	62	2.09461	65	2.95158	[PATO:0001997]
ZFIN:ZDB-GENE-070117-447	unm tf47	19	0.0270652	5	0.144231	62	2.09461	65	2.95158	[PATO:0001997]
ZFIN:ZDB-GENE-070117-402	unm m441	19	0.0270652	5	0.144231	62	2.09461	65	2.95158	[PATO:0001997]
ZFIN:ZDB-GENE-070117-399	unm tz272	19	0.0270652	5	0.144231	62	2.09461	65	2.95158	[PATO:0001997]
ZFIN:ZDB-GENE-070117-395	unm tf228	19	0.0270652	5	0.144231	62	2.09461	65	2.95158	[PATO:0001997]
ZFIN:ZDB-GENE-070117-384	unm tc226c	19	0.0270652	5	0.144231	62	2.09461	65	2.95158	[PATO:0001997]
ZFIN:ZDB-GENE-070117-316	unm tl226b	19	0.0270652	5	0.144231	62	2.09461	65	2.95158	[PATO:0001997]
ZFIN:ZDB-GENE-070117-273	unm tc244d	19	0.0270652	5	0.144231	62	2.09461	65	2.95158	[PATO:0001997]
ZFIN:ZDB-GENE-070117-266	unm tw222	19	0.0270652	5	0.144231	62	2.09461	65	2.95158	[PATO:0001997]
ZFIN:ZDB-GENE-070117-184	unm tc326c	19	0.0270652	5	0.144231	62	2.09461	65	2.95158	[PATO:0001997]
ZFIN:ZDB-GENE-070117-155	unm tz309	19	0.0270652	5	0.144231	62	2.09461	65	2.95158	[PATO:0001997]
ZFIN:ZDB-GENE-070117-122	unm tc246c	19	0.0270652	5	0.144231	62	2.09461	65	2.95158	[PATO:0001997]
ZFIN:ZDB-GENE-070117-2292	que	34	0.0268657	172	0.0963303	2	3.30529	11	4.19848	[PATO:0000762]
ZFIN:ZDB-GENE-070117-557	unm m386	35	0.0267121	21	0.138889	194	1.58592	65	2.95158	[PATO:0001997]
ZFIN:ZDB-GENE-070117-489	unm m723	35	0.0267121	21	0.138889	194	1.58592	65	2.95158	[PATO:0001997]
ZFIN:ZDB-GENE-070117-130	unm m434	35	0.0267121	21	0.138889	194	1.58592	65	2.95158	[PATO:0001997]
ZFIN:ZDB-GENE-050105-3	slc6a9	38	0.0266405	36	0.125	89	1.88089	65	2.95158	[PATO:0001997]
ZFIN:ZDB-GENE-030131-1613	otop1	39	0.0265917	52	0.113772	58	2.15776	65	2.95158	[PATO:0001997]
ZFIN:ZDB-GENE-030131-3445	dicer1	40	0.0265324	24	0.138095	207	1.52655	65	2.95158	[PATO:0001997]
ZFIN:ZDB-GENE-070117-492	unm tx239	41	0.0262467	182	0.0950226	87	1.96296	11	4.19848	[PATO:0000762]
ZFIN:ZDB-GENE-070117-342	unm tg415	42	0.0261211	177	0.0954545	9	2.45077	11	4.19848	[PATO:0000762]
ZFIN:ZDB-GENE-070117-810	flan	43	0.0260422	27	0.136364	194	1.58592	65	2.95158	[PATO:0001997]
ZFIN:ZDB-GENE-070117-802	beat	43	0.0260422	27	0.136364	194	1.58592	65	2.95158	[PATO:0001997]
ZFIN:ZDB-GENE-070117-727	slak	43	0.0260422	27	0.136364	194	1.58592	65	2.95158	[PATO:0001997]
ZFIN:ZDB-GENE-031006-2	pah	43	0.0260422	27	0.136364	194	1.58592	65	2.95158	[PATO:0001997]
ZFIN:ZDB-GENE-070117-2360	sky	47	0.0259134	48	0.116883	82	1.97321	65	2.95158	[PATO:0001997]
ZFIN:ZDB-GENE-030113-2	ttna	48	0.0258541	189	0.0936455	61	2.12358	2	5.96557	[GO:0005737]
ZFIN:ZDB-GENE-070117-2373	sof	49	0.0255107	202	0.0929204	7	2.52953	11	4.19848	[PATO:0000762]
ZFIN:ZDB-GENE-990415-270	tp53	50	0.0250678	20	0.144068	227	1.24038	65	2.95158	[PATO:0001997]
ZFIN:ZDB-GENE-070117-2442	tur	51	0.0249123	100	0.103261	187	1.72804	65	2.95158	[PATO:0001997]
ZFIN:ZDB-GENE-070117-2277	pol	52	0.0246779	41	0.117647	191	1.60479	65	2.95158	[PATO:0001997]
ZFIN:ZDB-GENE-070117-450	unm tu254	53	0.0243653	42	0.117188	211	1.46383	65	2.95158	[PATO:0001997]
ZFIN:ZDB-GENE-070117-341	unm tt254b	53	0.0243653	42	0.117188	211	1.46383	65	2.95158	[PATO:0001997]
ZFIN:ZDB-GENE-070117-295	unm te252	53	0.0243653	42	0.117188	211	1.46383	65	2.95158	[PATO:0001997]
ZFIN:ZDB-GENE-070117-2186	mah	53	0.0243653	42	0.117188	211	1.46383	65	2.95158	[PATO:0001997]
ZFIN:ZDB-GENE-070117-2120	hem	53	0.0243653	42	0.117188	211	1.46383	65	2.95158	[PATO:0001997]
ZFIN:ZDB-GENE-070117-146	unm tj254	53	0.0243653	42	0.117188	211	1.46383	65	2.95158	[PATO:0001997]
ZFIN:ZDB-GENE-070117-620	unm tg248c	59	0.0240788	53	0.113636	228	1.24	65	2.95158	[PATO:0001997]
ZFIN:ZDB-GENE-010426-1	dmd	60	0.0239669	72	0.108571	8	2.52169	10	4.44835	[GO:0044464]
ZFIN:ZDB-GENE-070117-282	unm m154	61	0.0238696	95	0.104895	228	1.24	65	2.95158	[PATO:0001997]
ZFIN:ZDB-GENE-070117-1697	unm t31050	62	0.0236987	54	0.112903	93	1.76006	65	2.95158	[PATO:0001997]
ZFIN:ZDB-GENE-070117-1690	unm t30984	62	0.0236987	55	0.112903	93	1.76006	65	2.95158	[PATO:0001997]
ZFIN:ZDB-GENE-070117-931	unm t30503	64	0.02359	124	0.0974026	11	2.30061	18	3.38171	[GO:0051179]
ZFIN:ZDB-GENE-070117-1686	unm t31151	64	0.02359	124	0.0974026	11	2.30061	18	3.38171	[GO:0051179]
ZFIN:ZDB-GENE-070117-1674	unm t30958	64	0.02359	124	0.0974026	11	2.30061	18	3.38171	[GO:0051179]
ZFIN:ZDB-GENE-070117-1673	unm t30957	64	0.02359	124	0.0974026	11	2.30061	18	3.38171	[GO:0051179]
ZFIN:ZDB-GENE-070117-1542	unm t30884	64	0.02359	124	0.0974026	11	2.30061	18	3.38171	[GO:0051179]
ZFIN:ZDB-GENE-070117-1494	unm t30497	64	0.02359	124	0.0974026	11	2.30061	18	3.38171	[GO:0051179]
ZFIN:ZDB-GENE-070117-1476	unm t30168	64	0.02359	124	0.0974026	11	2.30061	18	3.38171	[GO:0051179]
ZFIN:ZDB-GENE-070117-1475	unm t30490	64	0.02359	124	0.0974026	11	2.30061	18	3.38171	[GO:0051179]
ZFIN:ZDB-GENE-070117-1468	unm t30328	64	0.02359	124	0.0974026	11	2.30061	18	3.38171	[GO:0051179]
ZFIN:ZDB-GENE-070117-1467	unm t30330	64	0.02359	124	0.0974026	11	2.30061	18	3.38171	[GO:0051179]
ZFIN:ZDB-GENE-070117-1429	unm t30329	64	0.02359	124	0.0974026	11	2.30061	18	3.38171	[GO:0051179]
ZFIN:ZDB-GENE-070117-1321	unm t30813	64	0.02359	124	0.0974026	11	2.30061	18	3.38171	[GO:0051179]
ZFIN:ZDB-GENE-070117-1309	unm t30135	64	0.02359	124	0.0974026	11	2.30061	18	3.38171	[GO:0051179]
ZFIN:ZDB-GENE-070117-1224	unm t30196	64	0.02359	124	0.0974026	11	2.30061	18	3.38171	[GO:0051179]
ZFIN:ZDB-GENE-070117-1214	unm t30427	64	0.02359	124	0.0974026	11	2.30061	18	3.38171	[GO:0051179]
ZFIN:ZDB-GENE-070117-1140	unm t30494	64	0.02359	124	0.0974026	11	2.30061	18	3.38171	[GO:0051179]
ZFIN:ZDB-GENE-070117-1056	unm t30336	64	0.02359	124	0.0974026	11	2.30061	18	3.38171	[GO:0051179]
ZFIN:ZDB-GENE-070117-1055	unm t30335	64	0.02359	124	0.0974026	11	2.30061	18	3.38171	[GO:0051179]
ZFIN:ZDB-GENE-070117-1054	unm t30267	64	0.02359	124	0.0974026	11	2.30061	18	3.38171	[GO:0051179]
ZFIN:ZDB-GENE-070117-1053	unm t30200	64	0.02359	124	0.0974026	11	2.30061	18	3.38171	[GO:0051179]
ZFIN:ZDB-GENE-070117-1051	unm t30199	64	0.02359	124	0.0974026	11	2.30061	18	3.38171	[GO:0051179]
ZFIN:ZDB-GENE-070117-1050	unm t30197	64	0.02359	124	0.0974026	11	2.30061	18	3.38171	[GO:0051179]
ZFIN:ZDB-GENE-070117-1049	unm t30169	64	0.02359	124	0.0974026	11	2.30061	18	3.38171	[GO:0051179]
ZFIN:ZDB-GENE-070117-1048	unm t30167	64	0.02359	124	0.0974026	11	2.30061	18	3.38171	[GO:0051179]
ZFIN:ZDB-GENE-070117-1047	unm t30888	64	0.02359	124	0.0974026	11	2.30061	18	3.38171	[GO:0051179]
ZFIN:ZDB-GENE-070117-1046	unm t30849	64	0.02359	124	0.0974026	11	2.30061	18	3.38171	[GO:0051179]
ZFIN:ZDB-GENE-070117-1045	unm t30562	64	0.02359	124	0.0974026	11	2.30061	18	3.38171	[GO:0051179]
ZFIN:ZDB-GENE-070117-1044	unm t30913	64	0.02359	124	0.0974026	11	2.30061	18	3.38171	[GO:0051179]
ZFIN:ZDB-GENE-070117-1043	unm t30265	64	0.02359	124	0.0974026	11	2.30061	18	3.38171	[GO:0051179]
ZFIN:ZDB-GENE-070117-1042	unm t30262	64	0.02359	124	0.0974026	11	2.30061	18	3.38171	[GO:0051179]
ZFIN:ZDB-GENE-070117-1040	unm t30260	64	0.02359	124	0.0974026	11	2.30061	18	3.38171	[GO:0051179]
ZFIN:ZDB-GENE-070117-1039	unm t30428	64	0.02359	124	0.0974026	11	2.30061	18	3.38171	[GO:0051179]
ZFIN:ZDB-GENE-070117-1038	unm t30595	64	0.02359	124	0.0974026	11	2.30061	18	3.38171	[GO:0051179]
ZFIN:ZDB-GENE-070117-1037	unm t30426	64	0.02359	124	0.0974026	11	2.30061	18	3.38171	[GO:0051179]
ZFIN:ZDB-GENE-070117-1036	unm t30376	64	0.02359	124	0.0974026	11	2.30061	18	3.38171	[GO:0051179]
ZFIN:ZDB-GENE-070117-1035	unm t30300	64	0.02359	124	0.0974026	11	2.30061	18	3.38171	[GO:0051179]
ZFIN:ZDB-GENE-070117-1034	unm t30299	64	0.02359	124	0.0974026	11	2.30061	18	3.38171	[GO:0051179]
ZFIN:ZDB-GENE-070117-1033	unm t30301	64	0.02359	124	0.0974026	11	2.30061	18	3.38171	[GO:0051179]
ZFIN:ZDB-GENE-070117-1032	unm t30563	64	0.02359	124	0.0974026	11	2.30061	18	3.38171	[GO:0051179]
ZFIN:ZDB-GENE-070117-1031	unm t30886	64	0.02359	124	0.0974026	11	2.30061	18	3.38171	[GO:0051179]
ZFIN:ZDB-GENE-070117-1029	unm t30711	64	0.02359	124	0.0974026	11	2.30061	18	3.38171	[GO:0051179]
ZFIN:ZDB-GENE-070117-1028	unm t30491	64	0.02359	124	0.0974026	11	2.30061	18	3.38171	[GO:0051179]
ZFIN:ZDB-GENE-070117-1012	unm t30134	64	0.02359	124	0.0974026	11	2.30061	18	3.38171	[GO:0051179]
ZFIN:ZDB-GENE-070117-1011	unm t30501	64	0.02359	124	0.0974026	11	2.30061	18	3.38171	[GO:0051179]
ZFIN:ZDB-GENE-070117-1005	unm t30712	64	0.02359	124	0.0974026	11	2.30061	18	3.38171	[GO:0051179]
ZFIN:ZDB-GENE-070117-1004	unm t30709	64	0.02359	124	0.0974026	11	2.30061	18	3.38171	[GO:0051179]
ZFIN:ZDB-GENE-070117-1002	unm t30713	64	0.02359	124	0.0974026	11	2.30061	18	3.38171	[GO:0051179]
ZFIN:ZDB-GENE-990715-10	skib	111	0.0234021	4	0.152	237	1.13668	236	1.70481	[WBPhenotype:0000577]
ZFIN:ZDB-GENE-000125-4	dlc	112	0.0232851	62	0.109756	219	1.40766	65	2.95158	[PATO:0001997]
ZFIN:ZDB-GENE-001207-3	arnt2	113	0.0232031	102	0.10241	221	1.31433	65	2.95158	[PATO:0001997]
ZFIN:ZDB-GENE-070117-470	unm m418	114	0.0229671	56	0.112676	230	1.22276	65	2.95158	[PATO:0001997]
ZFIN:ZDB-GENE-070117-917	unm t30918	115	0.0225559	72	0.108527	93	1.76006	65	2.95158	[PATO:0001997]
ZFIN:ZDB-GENE-070117-912	unm t30891	115	0.0225559	72	0.108527	93	1.76006	65	2.95158	[PATO:0001997]
ZFIN:ZDB-GENE-070117-909	unm t30858	115	0.0225559	72	0.108527	93	1.76006	65	2.95158	[PATO:0001997]
ZFIN:ZDB-GENE-070117-905	unm t30914	115	0.0225559	72	0.108527	93	1.76006	65	2.95158	[PATO:0001997]
ZFIN:ZDB-GENE-070117-903	unm t30925	115	0.0225559	72	0.108527	93	1.76006	65	2.95158	[PATO:0001997]
ZFIN:ZDB-GENE-070117-899	unm t30931	115	0.0225559	72	0.108527	93	1.76006	65	2.95158	[PATO:0001997]
ZFIN:ZDB-GENE-070117-1544	unm t30933	115	0.0225559	72	0.108527	93	1.76006	65	2.95158	[PATO:0001997]
ZFIN:ZDB-GENE-070117-1539	unm t30861	115	0.0225559	72	0.108527	93	1.76006	65	2.95158	[PATO:0001997]
ZFIN:ZDB-GENE-070117-1534	unm t30916	115	0.0225559	72	0.108527	93	1.76006	65	2.95158	[PATO:0001997]
ZFIN:ZDB-GENE-070117-1533	unm t30860	115	0.0225559	72	0.108527	93	1.76006	65	2.95158	[PATO:0001997]
ZFIN:ZDB-GENE-070117-1531	unm t30863	115	0.0225559	72	0.108527	93	1.76006	65	2.95158	[PATO:0001997]
ZFIN:ZDB-GENE-070117-1528	unm t30929	115	0.0225559	72	0.108527	93	1.76006	65	2.95158	[PATO:0001997]
ZFIN:ZDB-GENE-070117-1522	unm t30930	115	0.0225559	72	0.108527	93	1.76006	65	2.95158	[PATO:0001997]
ZFIN:ZDB-GENE-070117-1521	unm t30932	115	0.0225559	72	0.108527	93	1.76006	65	2.95158	[PATO:0001997]
ZFIN:ZDB-GENE-070117-1515	unm t30895	115	0.0225559	72	0.108527	93	1.76006	65	2.95158	[PATO:0001997]
ZFIN:ZDB-GENE-070117-1396	unm t30915	115	0.0225559	72	0.108527	93	1.76006	65	2.95158	[PATO:0001997]
ZFIN:ZDB-GENE-070117-1352	unm t30923	115	0.0225559	72	0.108527	93	1.76006	65	2.95158	[PATO:0001997]
ZFIN:ZDB-GENE-070117-1290	unm t30857	115	0.0225559	72	0.108527	93	1.76006	65	2.95158	[PATO:0001997]
ZFIN:ZDB-GENE-070117-626	unm tc319	133	0.0225103	59	0.110345	194	1.56292	65	2.95158	[PATO:0001997]
ZFIN:ZDB-GENE-070117-119	unm th242f	133	0.0225103	60	0.110345	194	1.56292	65	2.95158	[PATO:0001997]
ZFIN:ZDB-GENE-070117-2489	zwa	133	0.0225103	61	0.110345	230	1.22276	65	2.95158	[PATO:0001997]
ZFIN:ZDB-GENE-070117-2328	sah	136	0.0224567	120	0.0989011	191	1.60479	65	2.95158	[PATO:0001997]
ZFIN:ZDB-GENE-070117-1997	clx	137	0.0223972	120	0.0989011	82	1.97321	65	2.95158	[PATO:0001997]
ZFIN:ZDB-GENE-980526-268	gata1	138	0.0223046	114	0.1	236	1.18272	65	2.95158	[PATO:0001997]
ZFIN:ZDB-GENE-070117-1916	unm t31534	139	0.0222359	93	0.106383	62	2.09461	65	2.95158	[PATO:0001997]
ZFIN:ZDB-GENE-070117-2497	bru	140	0.0221459	203	0.0927835	220	1.37089	65	2.95158	[PATO:0001997]
ZFIN:ZDB-GENE-070228-3	hcrtr2	141	0.0219878	3	0.160584	235	1.18754	236	1.70481	[WBPhenotype:0000577]
ZFIN:ZDB-GENE-070117-1363	unm t30907	142	0.0216	105	0.100719	93	1.76006	65	2.95158	[PATO:0001997]
ZFIN:ZDB-GENE-070117-1595	unm ty54x	143	0.0215855	124	0.0974026	211	1.46383	65	2.95158	[PATO:0001997]
ZFIN:ZDB-GENE-080318-2	bar	144	0.0211518	58	0.110429	90	1.80946	65	2.95158	[PATO:0001997]
ZFIN:ZDB-GENE-070117-1518	unm t30466	145	0.021125	105	0.100719	93	1.76006	65	2.95158	[PATO:0001997]
ZFIN:ZDB-GENE-070117-1473	unm t30517	145	0.021125	105	0.100719	93	1.76006	65	2.95158	[PATO:0001997]
ZFIN:ZDB-GENE-070117-1378	unm t30255	145	0.021125	105	0.100719	93	1.76006	65	2.95158	[PATO:0001997]
ZFIN:ZDB-GENE-070117-1377	unm t30467	145	0.021125	105	0.100719	93	1.76006	65	2.95158	[PATO:0001997]
ZFIN:ZDB-GENE-070117-1319	unm t30516	145	0.021125	105	0.100719	93	1.76006	65	2.95158	[PATO:0001997]
ZFIN:ZDB-GENE-070117-1314	unm t30512	145	0.021125	105	0.100719	93	1.76006	65	2.95158	[PATO:0001997]
ZFIN:ZDB-GENE-070117-1252	unm t30253	145	0.021125	105	0.100719	93	1.76006	65	2.95158	[PATO:0001997]
ZFIN:ZDB-GENE-070117-1421	unm t30213	152	0.0210349	184	0.0939597	93	1.76006	65	2.95158	[PATO:0001997]
ZFIN:ZDB-GENE-070117-1127	unm t30721	152	0.0210349	184	0.0939597	93	1.76006	65	2.95158	[PATO:0001997]
ZFIN:ZDB-GENE-070117-1115	unm t30696	152	0.0210349	184	0.0939597	93	1.76006	65	2.95158	[PATO:0001997]
ZFIN:ZDB-GENE-070117-1113	unm t30214	152	0.0210349	184	0.0939597	93	1.76006	65	2.95158	[PATO:0001997]
ZFIN:ZDB-GENE-070117-1098	unm t30781	156	0.0210006	103	0.102362	189	1.67295	65	2.95158	[PATO:0001997]
ZFIN:ZDB-GENE-070117-161	unm tq221b	157	0.0209518	188	0.09375	211	1.46383	65	2.95158	[PATO:0001997]
ZFIN:ZDB-GENE-070117-1227	unm t30854	158	0.0209378	104	0.101449	93	1.76006	65	2.95158	[PATO:0001997]
ZFIN:ZDB-GENE-030131-2773	trim33	159	0.0209033	173	0.0957447	191	1.60479	65	2.95158	[PATO:0001997]
ZFIN:ZDB-GENE-070117-1857	unm t31529	160	0.0205668	204	0.0927152	93	1.76006	65	2.95158	[PATO:0001997]
ZFIN:ZDB-GENE-070117-1856	unm t31528	160	0.0205668	204	0.0927152	93	1.76006	65	2.95158	[PATO:0001997]
ZFIN:ZDB-GENE-070117-1855	unm t31527	160	0.0205668	204	0.0927152	93	1.76006	65	2.95158	[PATO:0001997]
ZFIN:ZDB-GENE-070117-1853	unm t31526	160	0.0205668	204	0.0927152	93	1.76006	65	2.95158	[PATO:0001997]
ZFIN:ZDB-GENE-070117-1852	unm t31525	160	0.0205668	204	0.0927152	93	1.76006	65	2.95158	[PATO:0001997]
ZFIN:ZDB-GENE-070117-1851	unm t31524	160	0.0205668	204	0.0927152	93	1.76006	65	2.95158	[PATO:0001997]
ZFIN:ZDB-GENE-070117-1850	unm t31523	160	0.0205668	204	0.0927152	93	1.76006	65	2.95158	[PATO:0001997]
ZFIN:ZDB-GENE-070117-1849	unm t31522	160	0.0205668	204	0.0927152	93	1.76006	65	2.95158	[PATO:0001997]
ZFIN:ZDB-GENE-070117-1848	unm t31521	160	0.0205668	204	0.0927152	93	1.76006	65	2.95158	[PATO:0001997]
ZFIN:ZDB-GENE-070117-1847	unm t31520	160	0.0205668	204	0.0927152	93	1.76006	65	2.95158	[PATO:0001997]
ZFIN:ZDB-GENE-070117-1846	unm t31519	160	0.0205668	204	0.0927152	93	1.76006	65	2.95158	[PATO:0001997]
ZFIN:ZDB-GENE-070117-1845	unm t31518	160	0.0205668	204	0.0927152	93	1.76006	65	2.95158	[PATO:0001997]
ZFIN:ZDB-GENE-070117-1844	unm t31517	160	0.0205668	204	0.0927152	93	1.76006	65	2.95158	[PATO:0001997]
ZFIN:ZDB-GENE-070117-1842	unm t31516	160	0.0205668	204	0.0927152	93	1.76006	65	2.95158	[PATO:0001997]
ZFIN:ZDB-GENE-070117-1841	unm t31515	160	0.0205668	204	0.0927152	93	1.76006	65	2.95158	[PATO:0001997]
ZFIN:ZDB-GENE-070117-1840	unm t31514	160	0.0205668	204	0.0927152	93	1.76006	65	2.95158	[PATO:0001997]
ZFIN:ZDB-GENE-070117-1839	unm t31513	160	0.0205668	204	0.0927152	93	1.76006	65	2.95158	[PATO:0001997]
ZFIN:ZDB-GENE-070117-1838	unm t31512	160	0.0205668	204	0.0927152	93	1.76006	65	2.95158	[PATO:0001997]
ZFIN:ZDB-GENE-070117-1837	unm t31473	160	0.0205668	204	0.0927152	93	1.76006	65	2.95158	[PATO:0001997]
ZFIN:ZDB-GENE-070117-1836	unm t31472	160	0.0205668	204	0.0927152	93	1.76006	65	2.95158	[PATO:0001997]
ZFIN:ZDB-GENE-070117-1835	unm t31471	160	0.0205668	204	0.0927152	93	1.76006	65	2.95158	[PATO:0001997]
ZFIN:ZDB-GENE-070117-1834	unm t31470	160	0.0205668	204	0.0927152	93	1.76006	65	2.95158	[PATO:0001997]
ZFIN:ZDB-GENE-070117-1833	unm t31469	160	0.0205668	204	0.0927152	93	1.76006	65	2.95158	[PATO:0001997]
ZFIN:ZDB-GENE-070117-1830	unm t31468	160	0.0205668	204	0.0927152	93	1.76006	65	2.95158	[PATO:0001997]
ZFIN:ZDB-GENE-070117-1829	unm t31467	160	0.0205668	204	0.0927152	93	1.76006	65	2.95158	[PATO:0001997]
ZFIN:ZDB-GENE-070117-1828	unm t31466	160	0.0205668	204	0.0927152	93	1.76006	65	2.95158	[PATO:0001997]
ZFIN:ZDB-GENE-070117-1827	unm t31465	160	0.0205668	204	0.0927152	93	1.76006	65	2.95158	[PATO:0001997]
ZFIN:ZDB-GENE-070117-1826	unm t31464	160	0.0205668	204	0.0927152	93	1.76006	65	2.95158	[PATO:0001997]
ZFIN:ZDB-GENE-070117-1825	unm t31463	160	0.0205668	204	0.0927152	93	1.76006	65	2.95158	[PATO:0001997]
ZFIN:ZDB-GENE-070117-1824	unm t31462	160	0.0205668	204	0.0927152	93	1.76006	65	2.95158	[PATO:0001997]
ZFIN:ZDB-GENE-070117-1823	unm t31461	160	0.0205668	204	0.0927152	93	1.76006	65	2.95158	[PATO:0001997]
ZFIN:ZDB-GENE-070117-1822	unm t31460	160	0.0205668	204	0.0927152	93	1.76006	65	2.95158	[PATO:0001997]
ZFIN:ZDB-GENE-070117-1821	unm t31459	160	0.0205668	204	0.0927152	93	1.76006	65	2.95158	[PATO:0001997]
ZFIN:ZDB-GENE-070117-1819	unm t31458	160	0.0205668	204	0.0927152	93	1.76006	65	2.95158	[PATO:0001997]
ZFIN:ZDB-GENE-070117-1818	unm t31457	160	0.0205668	204	0.0927152	93	1.76006	65	2.95158	[PATO:0001997]
ZFIN:ZDB-GENE-070117-1817	unm t31456	160	0.0205668	204	0.0927152	93	1.76006	65	2.95158	[PATO:0001997]
ZFIN:ZDB-GENE-070117-1816	unm t31455	160	0.0205668	204	0.0927152	93	1.76006	65	2.95158	[PATO:0001997]
ZFIN:ZDB-GENE-070117-1815	unm t31454	160	0.0205668	204	0.0927152	93	1.76006	65	2.95158	[PATO:0001997]
ZFIN:ZDB-GENE-070117-1814	unm t31434	160	0.0205668	204	0.0927152	93	1.76006	65	2.95158	[PATO:0001997]
ZFIN:ZDB-GENE-070117-1813	unm t31433	160	0.0205668	204	0.0927152	93	1.76006	65	2.95158	[PATO:0001997]
ZFIN:ZDB-GENE-070117-1812	unm t31432	160	0.0205668	204	0.0927152	93	1.76006	65	2.95158	[PATO:0001997]
ZFIN:ZDB-GENE-070117-1811	unm t31400	160	0.0205668	204	0.0927152	93	1.76006	65	2.95158	[PATO:0001997]
ZFIN:ZDB-GENE-070117-1810	unm t31399	160	0.0205668	204	0.0927152	93	1.76006	65	2.95158	[PATO:0001997]
ZFIN:ZDB-GENE-070117-1808	unm t31398	160	0.0205668	204	0.0927152	93	1.76006	65	2.95158	[PATO:0001997]
ZFIN:ZDB-GENE-070117-1807	unm t31397	160	0.0205668	204	0.0927152	93	1.76006	65	2.95158	[PATO:0001997]
ZFIN:ZDB-GENE-070117-1806	unm t31396	160	0.0205668	204	0.0927152	93	1.76006	65	2.95158	[PATO:0001997]
ZFIN:ZDB-GENE-070117-1805	unm t31395	160	0.0205668	204	0.0927152	93	1.76006	65	2.95158	[PATO:0001997]
ZFIN:ZDB-GENE-070306-4	unm b875	207	0.0202015	114	0.1	188	1.72556	65	2.95158	[PATO:0001997]
ZFIN:ZDB-GENE-070117-1710	unm t31141	208	0.0195056	190	0.0933333	93	1.76006	65	2.95158	[PATO:0001997]
ZFIN:ZDB-GENE-070117-1707	unm t31139	208	0.0195056	190	0.0933333	93	1.76006	65	2.95158	[PATO:0001997]
ZFIN:ZDB-GENE-070117-1705	unm t31107	208	0.0195056	190	0.0933333	93	1.76006	65	2.95158	[PATO:0001997]
ZFIN:ZDB-GENE-070117-1702	unm t31104	208	0.0195056	190	0.0933333	93	1.76006	65	2.95158	[PATO:0001997]
ZFIN:ZDB-GENE-070117-1699	unm t31051	208	0.0195056	190	0.0933333	93	1.76006	65	2.95158	[PATO:0001997]
ZFIN:ZDB-GENE-070117-1694	unm t31047	208	0.0195056	190	0.0933333	93	1.76006	65	2.95158	[PATO:0001997]
ZFIN:ZDB-GENE-070117-1693	unm t31046	208	0.0195056	190	0.0933333	93	1.76006	65	2.95158	[PATO:0001997]
ZFIN:ZDB-GENE-070117-1689	unm t30983	208	0.0195056	190	0.0933333	93	1.76006	65	2.95158	[PATO:0001997]
ZFIN:ZDB-GENE-070117-1688	unm t30982	208	0.0195056	190	0.0933333	93	1.76006	65	2.95158	[PATO:0001997]
ZFIN:ZDB-GENE-070117-1979	unm t31482	217	0.019182	190	0.0933333	93	1.76006	65	2.95158	[PATO:0001997]
ZFIN:ZDB-GENE-070117-1978	unm t31418	217	0.019182	190	0.0933333	93	1.76006	65	2.95158	[PATO:0001997]
ZFIN:ZDB-GENE-070117-1968	unm t30761	217	0.019182	190	0.0933333	93	1.76006	65	2.95158	[PATO:0001997]
ZFIN:ZDB-GENE-070117-1376	unm t30170	220	0.0191682	178	0.0952381	93	1.76006	65	2.95158	[PATO:0001997]
ZFIN:ZDB-GENE-070117-1359	unm t30856	221	0.0181791	114	0.1	186	1.75353	11	4.19848	[PATO:0000762]
ZFIN:ZDB-GENE-070117-2227	niv	222	0.0155041	36	0.125	205	1.53409	221	2.76581	[PATO:0001995]
ZFIN:ZDB-GENE-070117-706	cbn	223	0.0153458	36	0.125	205	1.53409	221	2.76581	[PATO:0001995]
ZFIN:ZDB-GENE-080110-4	srs334	224	0.0149949	49	0.116071	88	1.96048	17	4.07376	[PATO:0000186]
ZFIN:ZDB-GENE-010606-1	cdh1	225	0.0139662	71	0.108844	233	1.20113	221	2.76581	[PATO:0001995]
ZFIN:ZDB-GENE-070117-2110	hrp	226	0.0137409	101	0.103226	232	1.20874	221	2.76581	[PATO:0001995]
ZFIN:ZDB-GENE-070117-2445	twi	227	0.0120316	98	0.103448	203	1.55539	221	2.76581	[PATO:0001995]
ZFIN:ZDB-GENE-070117-2121	her	228	0.0120316	98	0.103448	203	1.55539	221	2.76581	[PATO:0001995]
ZFIN:ZDB-GENE-070117-2438	trl	229	0.0118507	50	0.114035	208	1.5245	221	2.76581	[PATO:0001995]
ZFIN:ZDB-GENE-070117-2085	ghl(l)	229	0.0118507	51	0.114035	208	1.5245	221	2.76581	[PATO:0001995]
ZFIN:ZDB-GENE-070117-711	aur	231	0.0115749	63	0.109244	238	1.02471	238	1.26794	[phenotype_slim_wb, WBPhenotype:0000886]
ZFIN:ZDB-GENE-070117-710	bop	231	0.0115749	63	0.109244	238	1.02471	238	1.26794	[phenotype_slim_wb, WBPhenotype:0000886]
ZFIN:ZDB-GENE-070117-707	gdg	231	0.0115749	63	0.109244	238	1.02471	238	1.26794	[phenotype_slim_wb, WBPhenotype:0000886]
ZFIN:ZDB-GENE-070117-697	fue	231	0.0115749	63	0.109244	238	1.02471	238	1.26794	[phenotype_slim_wb, WBPhenotype:0000886]
ZFIN:ZDB-GENE-070117-668	ack	231	0.0115749	63	0.109244	238	1.02471	238	1.26794	[phenotype_slim_wb, WBPhenotype:0000886]
ZFIN:ZDB-GENE-070117-652	srh	231	0.0115749	63	0.109244	238	1.02471	238	1.26794	[phenotype_slim_wb, WBPhenotype:0000886]
ZFIN:ZDB-GENE-070117-2518	nebel	231	0.0115749	63	0.109244	238	1.02471	238	1.26794	[phenotype_slim_wb, WBPhenotype:0000886]
ZFIN:ZDB-GENE-070117-2402	sad	231	0.0115749	63	0.109244	238	1.02471	238	1.26794	[phenotype_slim_wb, WBPhenotype:0000886]
ZFIN:ZDB-GENE-070117-708	kwa	231	0.0111749	91	0.106557	249	0.819094	238	1.26794	[phenotype_slim_wb, WBPhenotype:0000886]
ZFIN:ZDB-GENE-070117-702	mis	231	0.0111749	91	0.106557	249	0.819094	238	1.26794	[phenotype_slim_wb, WBPhenotype:0000886]
ZFIN:ZDB-GENE-070117-2141	kap	241	0.0109863	183	0.0942029	234	1.19394	221	2.76581	[PATO:0001995]
ZFIN:ZDB-GENE-080319-1	nui	242	0.0103194	122	0.0982143	210	1.50636	235	2.71139	[GO:0003008]
ZFIN:ZDB-GENE-070117-2194	baj	243	0.008931	117	0.0990991	222	1.26639	221	2.76581	[PATO:0001995]
ZFIN:ZDB-GENE-070117-2076	fro	243	0.008931	117	0.0990991	222	1.26639	221	2.76581	[PATO:0001995]
ZFIN:ZDB-GENE-040718-399	cacnb1	243	0.008931	117	0.0990991	222	1.26639	221	2.76581	[PATO:0001995]
ZFIN:ZDB-GENE-070117-2043	ali	246	0.00881795	175	0.0956522	222	1.26639	221	2.76581	[PATO:0001995]
ZFIN:ZDB-GENE-070117-2075	fst(l)	247	0.00872298	175	0.0956522	222	1.26639	221	2.76581	[PATO:0001995]
ZFIN:ZDB-GENE-070117-709	wal	248	0.00754767	178	0.0952381	246	1.01511	248	1.23915	[PATO:0001239]
ZFIN:ZDB-GENE-070117-411	unm tk252	248	0.00754767	178	0.0952381	246	1.01511	248	1.23915	[PATO:0001239]
ZFIN:ZDB-GENE-070117-311	unm tg229b	248	0.00754767	178	0.0952381	246	1.01511	248	1.23915	[PATO:0001239]
