# Supplementary material for: Linking Human Diseases to Animal Models Using Ontology-Based Phenotype Annotation
Source: PLoS Biol. 2009 Nov 24;7(11):e1000247. doi: 10.1371/journal.pbio.1000247 (PMC2774506; doi:10.1371/journal.pbio.1000247)
Supplement: Table S3 — Comparison between human EPB41 and zebrafish genes. The top 250 genes (by simJ) are reported, together with the rank and score for each metric (simIC, simJ, avgICCS, and maxIC). Additionally, the maxIC phenotype is reported using ontology identifiers. See Materials and Methods for a list of ontology prefixes. Known sequence orthologs are highlighted in yellow and listed in Table 6, if present. Genes at rank 1 are listed in Table 7. (0.08 MB XLS) [file pbio.1000247.s003.xls]

## Sheet: NCBI_Gene_2035-vs-allg-allscore
zfin gene id	zfin gene name	simIC rank	simIC	simJ rank	simJ	avgICCS rank	avgICCS	maxIC rank	maxIC	maxIC phenotype
ZFIN:ZDB-GENE-990603-9	smad5	1	0.0407945	7	0.14467	60	2.45725	10	6.70033	[PATO:0000419^OBO_REL:inheres_in(UBERON:CL_0000232-CL_0000562-FMA_62845-ZFA_0009256), PATO:0001997^OBO_REL:inheres_in(UBERON:CL_0000232-CL_0000562-FMA_62845-ZFA_0009256)]
ZFIN:ZDB-GENE-020419-34	dtl	2	0.0404885	89	0.132812	1	3.54391	1	8.97887	[GO:0005856]
ZFIN:ZDB-GENE-040426-2784	sass6	3	0.0403476	19	0.138889	5	3.32745	1	8.97887	[GO:0005856]
ZFIN:ZDB-GENE-980526-268	gata1	4	0.0351037	1	0.160622	61	2.45017	17	4.10988	[PATO:0000468^OBO_REL:inheres_in(UBERON:0000008), PATO:0001997^OBO_REL:inheres_in(UBERON:0000008)]
ZFIN:ZDB-GENE-020419-39	stil	5	0.0346883	183	0.117117	9	2.71718	1	8.97887	[GO:0005856]
ZFIN:ZDB-GENE-000125-4	dlc	6	0.0345998	2	0.15859	84	2.05554	17	4.10988	[PATO:0000468^OBO_REL:inheres_in(UBERON:0000008), PATO:0001997^OBO_REL:inheres_in(UBERON:0000008)]
ZFIN:ZDB-GENE-040724-10	sart3	7	0.0342486	25	0.137681	65	2.23074	14	5.1946	[GO:0005622]
ZFIN:ZDB-GENE-070117-1989	kiaa1279	8	0.0329619	226	0.116505	2	3.42383	1	8.97887	[GO:0005856]
ZFIN:ZDB-GENE-070117-280	zar	9	0.0329539	163	0.119186	3	3.35268	11	6.63572	[GO:0043228, GO:0043232]
ZFIN:ZDB-GENE-030131-2773	trim33	10	0.0320928	9	0.143426	87	2.00196	17	4.10988	[PATO:0000468^OBO_REL:inheres_in(UBERON:0000008), PATO:0001997^OBO_REL:inheres_in(UBERON:0000008)]
ZFIN:ZDB-GENE-070117-632	shy	11	0.0317678	227	0.116477	3	3.35268	11	6.63572	[GO:0043228, GO:0043232]
ZFIN:ZDB-GENE-070117-2515	clo	12	0.0314181	103	0.128959	11	2.5881	13	6.1413	[PATO:0000070^OBO_REL:inheres_in(UBERON:CL_0000232-CL_0000562-FMA_62845-ZFA_0009256)]
ZFIN:ZDB-GENE-051113-60	spna2	13	0.0308716	6	0.144695	12	2.58448	7	7.60447	[GO:0016020]
ZFIN:ZDB-GENE-070117-931	unm t30503	14	0.0306724	27	0.136364	13	2.55941	17	4.10988	[PATO:0000468^OBO_REL:inheres_in(UBERON:0000008), PATO:0001997^OBO_REL:inheres_in(UBERON:0000008)]
ZFIN:ZDB-GENE-070117-1686	unm t31151	14	0.0306724	27	0.136364	13	2.55941	17	4.10988	[PATO:0000468^OBO_REL:inheres_in(UBERON:0000008), PATO:0001997^OBO_REL:inheres_in(UBERON:0000008)]
ZFIN:ZDB-GENE-070117-1674	unm t30958	14	0.0306724	27	0.136364	13	2.55941	17	4.10988	[PATO:0000468^OBO_REL:inheres_in(UBERON:0000008), PATO:0001997^OBO_REL:inheres_in(UBERON:0000008)]
ZFIN:ZDB-GENE-070117-1673	unm t30957	14	0.0306724	27	0.136364	13	2.55941	17	4.10988	[PATO:0000468^OBO_REL:inheres_in(UBERON:0000008), PATO:0001997^OBO_REL:inheres_in(UBERON:0000008)]
ZFIN:ZDB-GENE-070117-1542	unm t30884	14	0.0306724	27	0.136364	13	2.55941	17	4.10988	[PATO:0000468^OBO_REL:inheres_in(UBERON:0000008), PATO:0001997^OBO_REL:inheres_in(UBERON:0000008)]
ZFIN:ZDB-GENE-070117-1494	unm t30497	14	0.0306724	27	0.136364	13	2.55941	17	4.10988	[PATO:0000468^OBO_REL:inheres_in(UBERON:0000008), PATO:0001997^OBO_REL:inheres_in(UBERON:0000008)]
ZFIN:ZDB-GENE-070117-1476	unm t30168	14	0.0306724	27	0.136364	13	2.55941	17	4.10988	[PATO:0000468^OBO_REL:inheres_in(UBERON:0000008), PATO:0001997^OBO_REL:inheres_in(UBERON:0000008)]
ZFIN:ZDB-GENE-070117-1475	unm t30490	14	0.0306724	27	0.136364	13	2.55941	17	4.10988	[PATO:0000468^OBO_REL:inheres_in(UBERON:0000008), PATO:0001997^OBO_REL:inheres_in(UBERON:0000008)]
ZFIN:ZDB-GENE-070117-1468	unm t30328	14	0.0306724	27	0.136364	13	2.55941	17	4.10988	[PATO:0000468^OBO_REL:inheres_in(UBERON:0000008), PATO:0001997^OBO_REL:inheres_in(UBERON:0000008)]
ZFIN:ZDB-GENE-070117-1467	unm t30330	14	0.0306724	27	0.136364	13	2.55941	17	4.10988	[PATO:0000468^OBO_REL:inheres_in(UBERON:0000008), PATO:0001997^OBO_REL:inheres_in(UBERON:0000008)]
ZFIN:ZDB-GENE-070117-1429	unm t30329	14	0.0306724	27	0.136364	13	2.55941	17	4.10988	[PATO:0000468^OBO_REL:inheres_in(UBERON:0000008), PATO:0001997^OBO_REL:inheres_in(UBERON:0000008)]
ZFIN:ZDB-GENE-070117-1321	unm t30813	14	0.0306724	27	0.136364	13	2.55941	17	4.10988	[PATO:0000468^OBO_REL:inheres_in(UBERON:0000008), PATO:0001997^OBO_REL:inheres_in(UBERON:0000008)]
ZFIN:ZDB-GENE-070117-1309	unm t30135	14	0.0306724	27	0.136364	13	2.55941	17	4.10988	[PATO:0000468^OBO_REL:inheres_in(UBERON:0000008), PATO:0001997^OBO_REL:inheres_in(UBERON:0000008)]
ZFIN:ZDB-GENE-070117-1224	unm t30196	14	0.0306724	27	0.136364	13	2.55941	17	4.10988	[PATO:0000468^OBO_REL:inheres_in(UBERON:0000008), PATO:0001997^OBO_REL:inheres_in(UBERON:0000008)]
ZFIN:ZDB-GENE-070117-1214	unm t30427	14	0.0306724	27	0.136364	13	2.55941	17	4.10988	[PATO:0000468^OBO_REL:inheres_in(UBERON:0000008), PATO:0001997^OBO_REL:inheres_in(UBERON:0000008)]
ZFIN:ZDB-GENE-070117-1140	unm t30494	14	0.0306724	27	0.136364	13	2.55941	17	4.10988	[PATO:0000468^OBO_REL:inheres_in(UBERON:0000008), PATO:0001997^OBO_REL:inheres_in(UBERON:0000008)]
ZFIN:ZDB-GENE-070117-1056	unm t30336	14	0.0306724	27	0.136364	13	2.55941	17	4.10988	[PATO:0000468^OBO_REL:inheres_in(UBERON:0000008), PATO:0001997^OBO_REL:inheres_in(UBERON:0000008)]
ZFIN:ZDB-GENE-070117-1055	unm t30335	14	0.0306724	27	0.136364	13	2.55941	17	4.10988	[PATO:0000468^OBO_REL:inheres_in(UBERON:0000008), PATO:0001997^OBO_REL:inheres_in(UBERON:0000008)]
ZFIN:ZDB-GENE-070117-1054	unm t30267	14	0.0306724	27	0.136364	13	2.55941	17	4.10988	[PATO:0000468^OBO_REL:inheres_in(UBERON:0000008), PATO:0001997^OBO_REL:inheres_in(UBERON:0000008)]
ZFIN:ZDB-GENE-070117-1053	unm t30200	14	0.0306724	27	0.136364	13	2.55941	17	4.10988	[PATO:0000468^OBO_REL:inheres_in(UBERON:0000008), PATO:0001997^OBO_REL:inheres_in(UBERON:0000008)]
ZFIN:ZDB-GENE-070117-1051	unm t30199	14	0.0306724	27	0.136364	13	2.55941	17	4.10988	[PATO:0000468^OBO_REL:inheres_in(UBERON:0000008), PATO:0001997^OBO_REL:inheres_in(UBERON:0000008)]
ZFIN:ZDB-GENE-070117-1050	unm t30197	14	0.0306724	27	0.136364	13	2.55941	17	4.10988	[PATO:0000468^OBO_REL:inheres_in(UBERON:0000008), PATO:0001997^OBO_REL:inheres_in(UBERON:0000008)]
ZFIN:ZDB-GENE-070117-1049	unm t30169	14	0.0306724	27	0.136364	13	2.55941	17	4.10988	[PATO:0000468^OBO_REL:inheres_in(UBERON:0000008), PATO:0001997^OBO_REL:inheres_in(UBERON:0000008)]
ZFIN:ZDB-GENE-070117-1048	unm t30167	14	0.0306724	27	0.136364	13	2.55941	17	4.10988	[PATO:0000468^OBO_REL:inheres_in(UBERON:0000008), PATO:0001997^OBO_REL:inheres_in(UBERON:0000008)]
ZFIN:ZDB-GENE-070117-1047	unm t30888	14	0.0306724	27	0.136364	13	2.55941	17	4.10988	[PATO:0000468^OBO_REL:inheres_in(UBERON:0000008), PATO:0001997^OBO_REL:inheres_in(UBERON:0000008)]
ZFIN:ZDB-GENE-070117-1046	unm t30849	14	0.0306724	27	0.136364	13	2.55941	17	4.10988	[PATO:0000468^OBO_REL:inheres_in(UBERON:0000008), PATO:0001997^OBO_REL:inheres_in(UBERON:0000008)]
ZFIN:ZDB-GENE-070117-1045	unm t30562	14	0.0306724	27	0.136364	13	2.55941	17	4.10988	[PATO:0000468^OBO_REL:inheres_in(UBERON:0000008), PATO:0001997^OBO_REL:inheres_in(UBERON:0000008)]
ZFIN:ZDB-GENE-070117-1044	unm t30913	14	0.0306724	27	0.136364	13	2.55941	17	4.10988	[PATO:0000468^OBO_REL:inheres_in(UBERON:0000008), PATO:0001997^OBO_REL:inheres_in(UBERON:0000008)]
ZFIN:ZDB-GENE-070117-1043	unm t30265	14	0.0306724	27	0.136364	13	2.55941	17	4.10988	[PATO:0000468^OBO_REL:inheres_in(UBERON:0000008), PATO:0001997^OBO_REL:inheres_in(UBERON:0000008)]
ZFIN:ZDB-GENE-070117-1042	unm t30262	14	0.0306724	27	0.136364	13	2.55941	17	4.10988	[PATO:0000468^OBO_REL:inheres_in(UBERON:0000008), PATO:0001997^OBO_REL:inheres_in(UBERON:0000008)]
ZFIN:ZDB-GENE-070117-1040	unm t30260	14	0.0306724	27	0.136364	13	2.55941	17	4.10988	[PATO:0000468^OBO_REL:inheres_in(UBERON:0000008), PATO:0001997^OBO_REL:inheres_in(UBERON:0000008)]
ZFIN:ZDB-GENE-070117-1039	unm t30428	14	0.0306724	27	0.136364	13	2.55941	17	4.10988	[PATO:0000468^OBO_REL:inheres_in(UBERON:0000008), PATO:0001997^OBO_REL:inheres_in(UBERON:0000008)]
ZFIN:ZDB-GENE-070117-1038	unm t30595	14	0.0306724	27	0.136364	13	2.55941	17	4.10988	[PATO:0000468^OBO_REL:inheres_in(UBERON:0000008), PATO:0001997^OBO_REL:inheres_in(UBERON:0000008)]
ZFIN:ZDB-GENE-070117-1037	unm t30426	14	0.0306724	27	0.136364	13	2.55941	17	4.10988	[PATO:0000468^OBO_REL:inheres_in(UBERON:0000008), PATO:0001997^OBO_REL:inheres_in(UBERON:0000008)]
ZFIN:ZDB-GENE-070117-1036	unm t30376	14	0.0306724	27	0.136364	13	2.55941	17	4.10988	[PATO:0000468^OBO_REL:inheres_in(UBERON:0000008), PATO:0001997^OBO_REL:inheres_in(UBERON:0000008)]
ZFIN:ZDB-GENE-070117-1035	unm t30300	14	0.0306724	27	0.136364	13	2.55941	17	4.10988	[PATO:0000468^OBO_REL:inheres_in(UBERON:0000008), PATO:0001997^OBO_REL:inheres_in(UBERON:0000008)]
ZFIN:ZDB-GENE-070117-1034	unm t30299	14	0.0306724	27	0.136364	13	2.55941	17	4.10988	[PATO:0000468^OBO_REL:inheres_in(UBERON:0000008), PATO:0001997^OBO_REL:inheres_in(UBERON:0000008)]
ZFIN:ZDB-GENE-070117-1033	unm t30301	14	0.0306724	27	0.136364	13	2.55941	17	4.10988	[PATO:0000468^OBO_REL:inheres_in(UBERON:0000008), PATO:0001997^OBO_REL:inheres_in(UBERON:0000008)]
ZFIN:ZDB-GENE-070117-1032	unm t30563	14	0.0306724	27	0.136364	13	2.55941	17	4.10988	[PATO:0000468^OBO_REL:inheres_in(UBERON:0000008), PATO:0001997^OBO_REL:inheres_in(UBERON:0000008)]
ZFIN:ZDB-GENE-070117-1031	unm t30886	14	0.0306724	27	0.136364	13	2.55941	17	4.10988	[PATO:0000468^OBO_REL:inheres_in(UBERON:0000008), PATO:0001997^OBO_REL:inheres_in(UBERON:0000008)]
ZFIN:ZDB-GENE-070117-1029	unm t30711	14	0.0306724	27	0.136364	13	2.55941	17	4.10988	[PATO:0000468^OBO_REL:inheres_in(UBERON:0000008), PATO:0001997^OBO_REL:inheres_in(UBERON:0000008)]
ZFIN:ZDB-GENE-070117-1028	unm t30491	14	0.0306724	27	0.136364	13	2.55941	17	4.10988	[PATO:0000468^OBO_REL:inheres_in(UBERON:0000008), PATO:0001997^OBO_REL:inheres_in(UBERON:0000008)]
ZFIN:ZDB-GENE-070117-1012	unm t30134	14	0.0306724	27	0.136364	13	2.55941	17	4.10988	[PATO:0000468^OBO_REL:inheres_in(UBERON:0000008), PATO:0001997^OBO_REL:inheres_in(UBERON:0000008)]
ZFIN:ZDB-GENE-070117-1011	unm t30501	14	0.0306724	27	0.136364	13	2.55941	17	4.10988	[PATO:0000468^OBO_REL:inheres_in(UBERON:0000008), PATO:0001997^OBO_REL:inheres_in(UBERON:0000008)]
ZFIN:ZDB-GENE-070117-1005	unm t30712	14	0.0306724	27	0.136364	13	2.55941	17	4.10988	[PATO:0000468^OBO_REL:inheres_in(UBERON:0000008), PATO:0001997^OBO_REL:inheres_in(UBERON:0000008)]
ZFIN:ZDB-GENE-070117-1004	unm t30709	14	0.0306724	27	0.136364	13	2.55941	17	4.10988	[PATO:0000468^OBO_REL:inheres_in(UBERON:0000008), PATO:0001997^OBO_REL:inheres_in(UBERON:0000008)]
ZFIN:ZDB-GENE-070117-1002	unm t30713	14	0.0306724	27	0.136364	13	2.55941	17	4.10988	[PATO:0000468^OBO_REL:inheres_in(UBERON:0000008), PATO:0001997^OBO_REL:inheres_in(UBERON:0000008)]
ZFIN:ZDB-GENE-070306-7	unm b984	61	0.0300029	120	0.128114	7	3.13773	6	7.9264	[PATO:0002006]
ZFIN:ZDB-GENE-040426-1146	traf3ip1	62	0.0298776	90	0.130814	64	2.25721	16	4.44835	[GO:0044464]
ZFIN:ZDB-GENE-031112-1	myh6	63	0.0297524	26	0.136842	10	2.67947	8	6.93934	[PATO:0000052^OBO_REL:inheres_in(UBERON:CARO_0000013-CL_0000000-FBbt_00007002-FMA_68646-XAO_0003012-ZFA_0009000)]
ZFIN:ZDB-GENE-991123-5	vmhc	64	0.0297027	18	0.139373	8	3.07937	8	6.93934	[PATO:0000052^OBO_REL:inheres_in(UBERON:CARO_0000013-CL_0000000-FBbt_00007002-FMA_68646-XAO_0003012-ZFA_0009000)]
ZFIN:ZDB-GENE-070117-1363	unm t30907	65	0.0284018	76	0.135922	148	1.73145	17	4.10988	[PATO:0000468^OBO_REL:inheres_in(UBERON:0000008), PATO:0001997^OBO_REL:inheres_in(UBERON:0000008)]
ZFIN:ZDB-GENE-070117-1563	dhv	66	0.0281258	124	0.12459	66	2.22723	78	3.79124	[cell_quality]
ZFIN:ZDB-GENE-030825-6	birc2	67	0.0273863	22	0.137931	63	2.26954	113	2.95158	[PATO:0001997]
ZFIN:ZDB-GENE-030113-2	ttna	68	0.0271775	92	0.130194	67	2.21784	14	5.1946	[GO:0005622]
ZFIN:ZDB-GENE-070306-8	unm b1035	69	0.0271721	16	0.142276	80	2.12399	78	3.79124	[cell_quality]
ZFIN:ZDB-GENE-021011-2	pak2a	70	0.0268657	121	0.127907	6	3.16661	5	8.9264	[PATO:0001362, PATO:0001662]
ZFIN:ZDB-GENE-070117-1710	unm t31141	71	0.026648	94	0.129032	148	1.73145	17	4.10988	[PATO:0000468^OBO_REL:inheres_in(UBERON:0000008), PATO:0001997^OBO_REL:inheres_in(UBERON:0000008)]
ZFIN:ZDB-GENE-070117-1707	unm t31139	71	0.026648	94	0.129032	148	1.73145	17	4.10988	[PATO:0000468^OBO_REL:inheres_in(UBERON:0000008), PATO:0001997^OBO_REL:inheres_in(UBERON:0000008)]
ZFIN:ZDB-GENE-070117-1705	unm t31107	71	0.026648	94	0.129032	148	1.73145	17	4.10988	[PATO:0000468^OBO_REL:inheres_in(UBERON:0000008), PATO:0001997^OBO_REL:inheres_in(UBERON:0000008)]
ZFIN:ZDB-GENE-070117-1702	unm t31104	71	0.026648	94	0.129032	148	1.73145	17	4.10988	[PATO:0000468^OBO_REL:inheres_in(UBERON:0000008), PATO:0001997^OBO_REL:inheres_in(UBERON:0000008)]
ZFIN:ZDB-GENE-070117-1699	unm t31051	71	0.026648	94	0.129032	148	1.73145	17	4.10988	[PATO:0000468^OBO_REL:inheres_in(UBERON:0000008), PATO:0001997^OBO_REL:inheres_in(UBERON:0000008)]
ZFIN:ZDB-GENE-070117-1694	unm t31047	71	0.026648	94	0.129032	148	1.73145	17	4.10988	[PATO:0000468^OBO_REL:inheres_in(UBERON:0000008), PATO:0001997^OBO_REL:inheres_in(UBERON:0000008)]
ZFIN:ZDB-GENE-070117-1693	unm t31046	71	0.026648	94	0.129032	148	1.73145	17	4.10988	[PATO:0000468^OBO_REL:inheres_in(UBERON:0000008), PATO:0001997^OBO_REL:inheres_in(UBERON:0000008)]
ZFIN:ZDB-GENE-070117-1689	unm t30983	71	0.026648	94	0.129032	148	1.73145	17	4.10988	[PATO:0000468^OBO_REL:inheres_in(UBERON:0000008), PATO:0001997^OBO_REL:inheres_in(UBERON:0000008)]
ZFIN:ZDB-GENE-070117-1688	unm t30982	71	0.026648	94	0.129032	148	1.73145	17	4.10988	[PATO:0000468^OBO_REL:inheres_in(UBERON:0000008), PATO:0001997^OBO_REL:inheres_in(UBERON:0000008)]
ZFIN:ZDB-GENE-020416-5	tbx24	80	0.0260289	91	0.130742	78	2.15991	17	4.10988	[PATO:0000468^OBO_REL:inheres_in(UBERON:0000008), PATO:0001997^OBO_REL:inheres_in(UBERON:0000008)]
ZFIN:ZDB-GENE-070117-2395	sth	81	0.0256658	5	0.14554	198	1.27641	113	2.95158	[PATO:0001997]
ZFIN:ZDB-GENE-040831-1	sars	82	0.0256515	19	0.138889	159	1.70368	134	2.88123	[PATO:0000001^OBO_REL:inheres_in(UBERON:0000008)]
ZFIN:ZDB-GENE-070117-282	unm m154	83	0.025388	21	0.138095	196	1.40539	113	2.95158	[PATO:0001997]
ZFIN:ZDB-GENE-070117-2073	frx	84	0.0253802	4	0.146226	146	1.76377	134	2.88123	[PATO:0000001^OBO_REL:inheres_in(UBERON:0000008)]
ZFIN:ZDB-GENE-070117-2477	yqe	85	0.0250494	3	0.147619	160	1.69099	134	2.88123	[PATO:0000001^OBO_REL:inheres_in(UBERON:0000008)]
ZFIN:ZDB-GENE-070117-2360	sky	86	0.024667	17	0.13964	194	1.41372	113	2.95158	[PATO:0001997]
ZFIN:ZDB-GENE-070117-2476	yyo	87	0.0246539	22	0.137931	88	1.98886	134	2.88123	[PATO:0000001^OBO_REL:inheres_in(UBERON:0000008)]
ZFIN:ZDB-GENE-070117-2266	png	88	0.0246539	22	0.137931	88	1.98886	134	2.88123	[PATO:0000001^OBO_REL:inheres_in(UBERON:0000008)]
ZFIN:ZDB-GENE-070117-2442	tur	89	0.0243107	74	0.136	197	1.33506	113	2.95158	[PATO:0001997]
ZFIN:ZDB-GENE-070117-1448	unm t30644	90	0.0239117	10	0.142857	72	2.16878	78	3.79124	[cell_quality]
ZFIN:ZDB-GENE-070117-1097	unm t30544	90	0.0239117	10	0.142857	72	2.16878	78	3.79124	[cell_quality]
ZFIN:ZDB-GENE-070117-1095	unm t30588	90	0.0239117	10	0.142857	72	2.16878	78	3.79124	[cell_quality]
ZFIN:ZDB-GENE-070117-1093	unm t30643	90	0.0239117	10	0.142857	72	2.16878	78	3.79124	[cell_quality]
ZFIN:ZDB-GENE-070117-1092	unm t30706	90	0.0239117	10	0.142857	72	2.16878	78	3.79124	[cell_quality]
ZFIN:ZDB-GENE-070117-1091	unm t30705	90	0.0239117	10	0.142857	72	2.16878	78	3.79124	[cell_quality]
ZFIN:ZDB-GENE-000208-20	bon	96	0.0238385	122	0.126582	195	1.41181	113	2.95158	[PATO:0001997]
ZFIN:ZDB-GENE-030813-2	piwil1	97	0.0227488	86	0.134615	83	2.08823	113	2.95158	[PATO:0001997]
ZFIN:ZDB-GENE-070117-253	unm tk259	98	0.0223255	230	0.115894	81	2.11256	94	3.18976	[PATO:0000052]
ZFIN:ZDB-GENE-070117-2335	sch	99	0.0219959	136	0.120438	162	1.6846	94	3.18976	[PATO:0000052]
ZFIN:ZDB-GENE-070117-2429	tbr	100	0.0218933	93	0.129808	62	2.37051	78	3.79124	[cell_quality]
ZFIN:ZDB-GENE-070117-1554	min	101	0.0217459	74	0.136	86	2.01905	113	2.95158	[PATO:0001997]
ZFIN:ZDB-GENE-070117-274	unm tu238	102	0.0215566	169	0.118705	82	2.0935	113	2.95158	[PATO:0001997]
ZFIN:ZDB-GENE-040702-5	kcnh2	103	0.0215281	118	0.128713	147	1.7493	144	2.78612	[PATO:0001996]
ZFIN:ZDB-GENE-070117-492	unm tx239	104	0.0213391	179	0.117647	90	1.96695	113	2.95158	[PATO:0001997]
ZFIN:ZDB-GENE-040825-1	rnf113a	105	0.0208254	161	0.119691	116	1.81894	94	3.18976	[PATO:0000052]
ZFIN:ZDB-GENE-070117-1506	unm t30715	106	0.020817	77	0.135266	91	1.92878	150	2.6285	[UBERON:FBbt_00000020-FMA_9577-MA_0000029-MIAA_0000298]
ZFIN:ZDB-GENE-070117-1502	unm t30587	106	0.020817	77	0.135266	91	1.92878	150	2.6285	[UBERON:FBbt_00000020-FMA_9577-MA_0000029-MIAA_0000298]
ZFIN:ZDB-GENE-070117-1447	unm t30645	106	0.020817	77	0.135266	91	1.92878	150	2.6285	[UBERON:FBbt_00000020-FMA_9577-MA_0000029-MIAA_0000298]
ZFIN:ZDB-GENE-070117-1162	unm t30545	106	0.020817	77	0.135266	91	1.92878	150	2.6285	[UBERON:FBbt_00000020-FMA_9577-MA_0000029-MIAA_0000298]
ZFIN:ZDB-GENE-070117-1161	unm t30543	106	0.020817	77	0.135266	91	1.92878	150	2.6285	[UBERON:FBbt_00000020-FMA_9577-MA_0000029-MIAA_0000298]
ZFIN:ZDB-GENE-070117-1133	unm t30546	106	0.020817	77	0.135266	91	1.92878	150	2.6285	[UBERON:FBbt_00000020-FMA_9577-MA_0000029-MIAA_0000298]
ZFIN:ZDB-GENE-070117-1125	unm t30351	106	0.020817	77	0.135266	91	1.92878	150	2.6285	[UBERON:FBbt_00000020-FMA_9577-MA_0000029-MIAA_0000298]
ZFIN:ZDB-GENE-070117-1106	unm t30350	106	0.020817	77	0.135266	91	1.92878	150	2.6285	[UBERON:FBbt_00000020-FMA_9577-MA_0000029-MIAA_0000298]
ZFIN:ZDB-GENE-070117-1105	unm t30349	106	0.020817	77	0.135266	91	1.92878	150	2.6285	[UBERON:FBbt_00000020-FMA_9577-MA_0000029-MIAA_0000298]
ZFIN:ZDB-GENE-040622-3	nf2	115	0.0205528	127	0.122271	158	1.72055	78	3.79124	[cell_quality]
ZFIN:ZDB-GENE-991110-8	tcf7l2	116	0.020517	135	0.120879	85	2.03301	78	3.79124	[cell_quality]
ZFIN:ZDB-GENE-980526-340	gata5	117	0.0204753	123	0.126126	163	1.65657	78	3.79124	[cell_quality]
ZFIN:ZDB-GENE-070117-1599	mer	118	0.0197138	88	0.133005	79	2.15465	134	2.88123	[PATO:0000001^OBO_REL:inheres_in(UBERON:0000008)]
ZFIN:ZDB-GENE-070306-11	unm b1074	119	0.0195562	128	0.121849	144	1.80684	113	2.95158	[PATO:0001997]
ZFIN:ZDB-GENE-070627-2	gin1	120	0.0194925	87	0.133641	117	1.81489	146	2.71	[PATO:0000586]
ZFIN:ZDB-GENE-070117-626	unm tc319	121	0.0194204	238	0.115207	171	1.62817	113	2.95158	[PATO:0001997]
ZFIN:ZDB-GENE-070117-2489	zwa	121	0.0194204	238	0.115207	171	1.62817	113	2.95158	[PATO:0001997]
ZFIN:ZDB-GENE-070117-119	unm th242f	121	0.0194204	238	0.115207	171	1.62817	113	2.95158	[PATO:0001997]
ZFIN:ZDB-GENE-070117-973	unm t30573	124	0.0193387	247	0.115044	164	1.65437	113	2.95158	[PATO:0001997]
ZFIN:ZDB-GENE-070117-972	unm t30614	124	0.0193387	247	0.115044	164	1.65437	113	2.95158	[PATO:0001997]
ZFIN:ZDB-GENE-070117-970	unm t30211	124	0.0193387	247	0.115044	164	1.65437	113	2.95158	[PATO:0001997]
ZFIN:ZDB-GENE-070117-1508	unm t30616	124	0.0193387	247	0.115044	164	1.65437	113	2.95158	[PATO:0001997]
ZFIN:ZDB-GENE-050909-1	crfb5	128	0.0193142	137	0.12	118	1.81036	150	2.6285	[UBERON:FBbt_00000020-FMA_9577-MA_0000029-MIAA_0000298]
ZFIN:ZDB-GENE-050522-437	ndufs5	128	0.0193142	137	0.12	118	1.81036	150	2.6285	[UBERON:FBbt_00000020-FMA_9577-MA_0000029-MIAA_0000298]
ZFIN:ZDB-GENE-041007-4	nola3	128	0.0193142	137	0.12	118	1.81036	150	2.6285	[UBERON:FBbt_00000020-FMA_9577-MA_0000029-MIAA_0000298]
ZFIN:ZDB-GENE-040930-11	rcl1	128	0.0193142	137	0.12	118	1.81036	150	2.6285	[UBERON:FBbt_00000020-FMA_9577-MA_0000029-MIAA_0000298]
ZFIN:ZDB-GENE-040924-3	wdr33	128	0.0193142	137	0.12	118	1.81036	150	2.6285	[UBERON:FBbt_00000020-FMA_9577-MA_0000029-MIAA_0000298]
ZFIN:ZDB-GENE-040915-3	kri1l	128	0.0193142	137	0.12	118	1.81036	150	2.6285	[UBERON:FBbt_00000020-FMA_9577-MA_0000029-MIAA_0000298]
ZFIN:ZDB-GENE-040712-1	ltv1	128	0.0193142	137	0.12	118	1.81036	150	2.6285	[UBERON:FBbt_00000020-FMA_9577-MA_0000029-MIAA_0000298]
ZFIN:ZDB-GENE-040426-1995	abce1	128	0.0193142	137	0.12	118	1.81036	150	2.6285	[UBERON:FBbt_00000020-FMA_9577-MA_0000029-MIAA_0000298]
ZFIN:ZDB-GENE-040426-1495	polr1c	128	0.0193142	137	0.12	118	1.81036	150	2.6285	[UBERON:FBbt_00000020-FMA_9577-MA_0000029-MIAA_0000298]
ZFIN:ZDB-GENE-040426-1029	rae1	128	0.0193142	137	0.12	118	1.81036	150	2.6285	[UBERON:FBbt_00000020-FMA_9577-MA_0000029-MIAA_0000298]
ZFIN:ZDB-GENE-040426-1011	qars	128	0.0193142	137	0.12	118	1.81036	150	2.6285	[UBERON:FBbt_00000020-FMA_9577-MA_0000029-MIAA_0000298]
ZFIN:ZDB-GENE-031030-2	eif4a1a	128	0.0193142	137	0.12	118	1.81036	150	2.6285	[UBERON:FBbt_00000020-FMA_9577-MA_0000029-MIAA_0000298]
ZFIN:ZDB-GENE-030828-12	hspa9	128	0.0193142	137	0.12	118	1.81036	150	2.6285	[UBERON:FBbt_00000020-FMA_9577-MA_0000029-MIAA_0000298]
ZFIN:ZDB-GENE-030131-8522	si:ch211-114c12.2	128	0.0193142	137	0.12	118	1.81036	150	2.6285	[UBERON:FBbt_00000020-FMA_9577-MA_0000029-MIAA_0000298]
ZFIN:ZDB-GENE-030131-616	gnl3	128	0.0193142	137	0.12	118	1.81036	150	2.6285	[UBERON:FBbt_00000020-FMA_9577-MA_0000029-MIAA_0000298]
ZFIN:ZDB-GENE-030131-3275	cpsf3	128	0.0193142	137	0.12	118	1.81036	150	2.6285	[UBERON:FBbt_00000020-FMA_9577-MA_0000029-MIAA_0000298]
ZFIN:ZDB-GENE-030131-3207	taf2	128	0.0193142	137	0.12	118	1.81036	150	2.6285	[UBERON:FBbt_00000020-FMA_9577-MA_0000029-MIAA_0000298]
ZFIN:ZDB-GENE-030102-2	zcchc7l	128	0.0193142	137	0.12	118	1.81036	150	2.6285	[UBERON:FBbt_00000020-FMA_9577-MA_0000029-MIAA_0000298]
ZFIN:ZDB-GENE-021231-2	dt1p1a10l	128	0.0193142	137	0.12	118	1.81036	150	2.6285	[UBERON:FBbt_00000020-FMA_9577-MA_0000029-MIAA_0000298]
ZFIN:ZDB-GENE-021213-1	sdad1	128	0.0193142	137	0.12	118	1.81036	150	2.6285	[UBERON:FBbt_00000020-FMA_9577-MA_0000029-MIAA_0000298]
ZFIN:ZDB-GENE-021115-8	kars	128	0.0193142	137	0.12	118	1.81036	150	2.6285	[UBERON:FBbt_00000020-FMA_9577-MA_0000029-MIAA_0000298]
ZFIN:ZDB-GENE-040915-1	cnot1	149	0.0192067	171	0.118577	177	1.59047	150	2.6285	[UBERON:FBbt_00000020-FMA_9577-MA_0000029-MIAA_0000298]
ZFIN:ZDB-GENE-040618-2	psmb1	149	0.0192067	171	0.118577	177	1.59047	150	2.6285	[UBERON:FBbt_00000020-FMA_9577-MA_0000029-MIAA_0000298]
ZFIN:ZDB-GENE-030616-54	thoc2	149	0.0192067	171	0.118577	177	1.59047	150	2.6285	[UBERON:FBbt_00000020-FMA_9577-MA_0000029-MIAA_0000298]
ZFIN:ZDB-GENE-030411-2	seph	149	0.0192067	171	0.118577	177	1.59047	150	2.6285	[UBERON:FBbt_00000020-FMA_9577-MA_0000029-MIAA_0000298]
ZFIN:ZDB-GENE-050320-149	nmd3	153	0.0190957	171	0.118577	168	1.64607	150	2.6285	[UBERON:FBbt_00000020-FMA_9577-MA_0000029-MIAA_0000298]
ZFIN:ZDB-GENE-030131-6349	nolc1l	153	0.0190957	171	0.118577	168	1.64607	150	2.6285	[UBERON:FBbt_00000020-FMA_9577-MA_0000029-MIAA_0000298]
ZFIN:ZDB-GENE-040831-4	gle1l	155	0.0190454	181	0.117188	177	1.59047	150	2.6285	[UBERON:FBbt_00000020-FMA_9577-MA_0000029-MIAA_0000298]
ZFIN:ZDB-GENE-040823-3	prpf3	155	0.0190454	181	0.117188	177	1.59047	150	2.6285	[UBERON:FBbt_00000020-FMA_9577-MA_0000029-MIAA_0000298]
ZFIN:ZDB-GENE-030131-2492	sf1	157	0.0189333	225	0.116732	177	1.59047	150	2.6285	[UBERON:FBbt_00000020-FMA_9577-MA_0000029-MIAA_0000298]
ZFIN:ZDB-GENE-021030-4	cad	158	0.018927	180	0.117647	184	1.57147	150	2.6285	[UBERON:FBbt_00000020-FMA_9577-MA_0000029-MIAA_0000298]
ZFIN:ZDB-GENE-031001-8	ddx27	159	0.0189094	228	0.116279	175	1.60981	150	2.6285	[UBERON:FBbt_00000020-FMA_9577-MA_0000029-MIAA_0000298]
ZFIN:ZDB-GENE-070306-4	unm b875	160	0.0189064	178	0.118182	161	1.68539	113	2.95158	[PATO:0001997]
ZFIN:ZDB-GENE-001207-3	arnt2	161	0.0188289	170	0.118644	191	1.50319	113	2.95158	[PATO:0001997]
ZFIN:ZDB-GENE-040426-1707	skp1	162	0.0188237	228	0.116279	193	1.41712	150	2.6285	[UBERON:FBbt_00000020-FMA_9577-MA_0000029-MIAA_0000298]
ZFIN:ZDB-GENE-070117-2328	sah	163	0.0188193	246	0.115079	174	1.62741	113	2.95158	[PATO:0001997]
ZFIN:ZDB-GENE-011026-1	sox32	164	0.0187387	129	0.121457	202	1.25277	144	2.78612	[PATO:0001996]
ZFIN:ZDB-GENE-040426-972	polr3f	165	0.0186872	231	0.11583	118	1.81036	150	2.6285	[UBERON:FBbt_00000020-FMA_9577-MA_0000029-MIAA_0000298]
ZFIN:ZDB-GENE-030131-2165	nfyc	165	0.0186872	231	0.11583	118	1.81036	150	2.6285	[UBERON:FBbt_00000020-FMA_9577-MA_0000029-MIAA_0000298]
ZFIN:ZDB-GENE-040927-28	ddx51	167	0.0185832	158	0.119835	118	1.81036	150	2.6285	[UBERON:FBbt_00000020-FMA_9577-MA_0000029-MIAA_0000298]
ZFIN:ZDB-GENE-040801-236	suds3	167	0.0185832	158	0.119835	118	1.81036	150	2.6285	[UBERON:FBbt_00000020-FMA_9577-MA_0000029-MIAA_0000298]
ZFIN:ZDB-GENE-030131-1736	exosc8	167	0.0185832	158	0.119835	118	1.81036	150	2.6285	[UBERON:FBbt_00000020-FMA_9577-MA_0000029-MIAA_0000298]
ZFIN:ZDB-GENE-070117-1124	unm t30379	170	0.0185142	8	0.14359	145	1.78354	146	2.71	[PATO:0000586]
ZFIN:ZDB-GENE-070117-935	unm t30908	171	0.0183892	238	0.115207	68	2.1718	90	3.38171	[GO:0051179]
ZFIN:ZDB-GENE-070117-1675	unm t30959	171	0.0183892	238	0.115207	68	2.1718	90	3.38171	[GO:0051179]
ZFIN:ZDB-GENE-070117-1465	unm t30198	171	0.0183892	238	0.115207	68	2.1718	90	3.38171	[GO:0051179]
ZFIN:ZDB-GENE-070117-1010	unm t30655	171	0.0183892	238	0.115207	68	2.1718	90	3.38171	[GO:0051179]
ZFIN:ZDB-GENE-030131-667	ddx46	175	0.0183672	177	0.118367	168	1.64607	150	2.6285	[UBERON:FBbt_00000020-FMA_9577-MA_0000029-MIAA_0000298]
ZFIN:ZDB-GENE-040426-1076	eif3g	176	0.0183585	236	0.115385	190	1.50324	94	3.18976	[PATO:0000052]
ZFIN:ZDB-GENE-070117-1021	unm t30566	177	0.0177718	119	0.128319	248	1.04438	146	2.71	[PATO:0000586]
ZFIN:ZDB-GENE-070117-563	unm m272	178	0.017454	134	0.120968	203	1.24112	207	2.26462	[UBERON:FMA_85006-MA_0002447-ZFA_0001438]
ZFIN:ZDB-GENE-070117-2485	zin	179	0.0172048	130	0.121212	185	1.54758	134	2.88123	[PATO:0000001^OBO_REL:inheres_in(UBERON:0000008)]
ZFIN:ZDB-GENE-070117-2156	kus	180	0.0172048	130	0.121212	185	1.54758	134	2.88123	[PATO:0000001^OBO_REL:inheres_in(UBERON:0000008)]
ZFIN:ZDB-GENE-070117-2097	gre	180	0.0172048	130	0.121212	185	1.54758	134	2.88123	[PATO:0000001^OBO_REL:inheres_in(UBERON:0000008)]
ZFIN:ZDB-GENE-030130-1	epb41	180	0.0172048	130	0.121212	185	1.54758	134	2.88123	[PATO:0000001^OBO_REL:inheres_in(UBERON:0000008)]
ZFIN:ZDB-GENE-070117-983	unm t30499	183	0.0170871	104	0.128866	100	1.90274	94	3.18976	[PATO:0000052]
ZFIN:ZDB-GENE-070117-981	unm t30412	183	0.0170871	104	0.128866	100	1.90274	94	3.18976	[PATO:0000052]
ZFIN:ZDB-GENE-070117-950	unm t30707	183	0.0170871	104	0.128866	100	1.90274	94	3.18976	[PATO:0000052]
ZFIN:ZDB-GENE-070117-1488	unm t30550	183	0.0170871	104	0.128866	100	1.90274	94	3.18976	[PATO:0000052]
ZFIN:ZDB-GENE-070117-1464	unm t30591	183	0.0170871	104	0.128866	100	1.90274	94	3.18976	[PATO:0000052]
ZFIN:ZDB-GENE-070117-1455	unm t30592	183	0.0170871	104	0.128866	100	1.90274	94	3.18976	[PATO:0000052]
ZFIN:ZDB-GENE-070117-1354	unm t30568	183	0.0170871	104	0.128866	100	1.90274	94	3.18976	[PATO:0000052]
ZFIN:ZDB-GENE-070117-1353	unm t30642	183	0.0170871	104	0.128866	100	1.90274	94	3.18976	[PATO:0000052]
ZFIN:ZDB-GENE-070117-1108	unm t30348	183	0.0170871	104	0.128866	100	1.90274	94	3.18976	[PATO:0000052]
ZFIN:ZDB-GENE-070117-1018	unm t30411	183	0.0170871	104	0.128866	100	1.90274	94	3.18976	[PATO:0000052]
ZFIN:ZDB-GENE-070117-1017	unm t30547	183	0.0170871	104	0.128866	100	1.90274	94	3.18976	[PATO:0000052]
ZFIN:ZDB-GENE-070117-1016	unm t30654	183	0.0170871	104	0.128866	100	1.90274	94	3.18976	[PATO:0000052]
ZFIN:ZDB-GENE-070117-1015	unm t30353	183	0.0170871	104	0.128866	100	1.90274	94	3.18976	[PATO:0000052]
ZFIN:ZDB-GENE-070117-1014	unm t30381	183	0.0170871	104	0.128866	100	1.90274	94	3.18976	[PATO:0000052]
ZFIN:ZDB-GENE-020123-2	s1pr2	197	0.0169354	166	0.119048	192	1.46977	198	2.59421	[PATO:0000141]
ZFIN:ZDB-GENE-050913-90	aplnrb	198	0.0163543	167	0.118852	189	1.52964	204	2.39002	[PATO:0000051^inheres_in_part_of(UBERON:FBbt_00005057-FMA_7161-MA_0000010-MIAA_0000016-XAO_0000100-ZFA_0000010)]
ZFIN:ZDB-GENE-070117-88	knu	199	0.0162716	168	0.118812	100	1.90274	94	3.18976	[PATO:0000052]
ZFIN:ZDB-GENE-070117-873	unm s277	200	0.0161149	125	0.123404	176	1.60952	204	2.39002	[PATO:0000051^inheres_in_part_of(UBERON:FBbt_00005057-FMA_7161-MA_0000010-MIAA_0000016-XAO_0000100-ZFA_0000010)]
ZFIN:ZDB-GENE-070117-1487	unm t30487	201	0.0160874	233	0.115556	199	1.26562	198	2.59421	[PATO:0000141]
ZFIN:ZDB-GENE-070117-1477	unm t30582	201	0.0160874	233	0.115556	199	1.26562	198	2.59421	[PATO:0000141]
ZFIN:ZDB-GENE-070117-1135	unm t30581	201	0.0160874	233	0.115556	199	1.26562	198	2.59421	[PATO:0000141]
ZFIN:ZDB-GENE-080317-1	psn	204	0.0159689	161	0.119691	115	1.88463	204	2.39002	[PATO:0000051^inheres_in_part_of(UBERON:FBbt_00005057-FMA_7161-MA_0000010-MIAA_0000016-XAO_0000100-ZFA_0000010)]
ZFIN:ZDB-GENE-070117-1375	unm t30650	205	0.0153131	164	0.119149	249	1.00049	202	2.49058	[UBERON:FBbt_00005055-FMA_7152-MA_0000323-MIAA_0000018-WBbt_0005748-XAO_0000125-ZFA_0000339]
ZFIN:ZDB-GENE-070117-1373	unm t30649	205	0.0153131	164	0.119149	249	1.00049	202	2.49058	[UBERON:FBbt_00005055-FMA_7152-MA_0000323-MIAA_0000018-WBbt_0005748-XAO_0000125-ZFA_0000339]
ZFIN:ZDB-GENE-070117-1206	unm t30471	207	0.0143542	126	0.123153	247	1.05199	207	2.26462	[UBERON:FMA_85006-MA_0002447-ZFA_0001438]
ZFIN:ZDB-GENE-070117-1022	unm t30222	208	0.0141042	238	0.115207	245	1.16334	146	2.71	[PATO:0000586]
ZFIN:ZDB-GENE-070117-996	unm t30873	209	0.0140231	184	0.116751	204	1.23018	207	2.26462	[UBERON:FMA_85006-MA_0002447-ZFA_0001438]
ZFIN:ZDB-GENE-070117-985	unm t30872	209	0.0140231	184	0.116751	204	1.23018	207	2.26462	[UBERON:FMA_85006-MA_0002447-ZFA_0001438]
ZFIN:ZDB-GENE-070117-974	unm t30843	209	0.0140231	184	0.116751	204	1.23018	207	2.26462	[UBERON:FMA_85006-MA_0002447-ZFA_0001438]
ZFIN:ZDB-GENE-070117-963	unm t30841	209	0.0140231	184	0.116751	204	1.23018	207	2.26462	[UBERON:FMA_85006-MA_0002447-ZFA_0001438]
ZFIN:ZDB-GENE-070117-952	unm t30840	209	0.0140231	184	0.116751	204	1.23018	207	2.26462	[UBERON:FMA_85006-MA_0002447-ZFA_0001438]
ZFIN:ZDB-GENE-070117-941	unm t30809	209	0.0140231	184	0.116751	204	1.23018	207	2.26462	[UBERON:FMA_85006-MA_0002447-ZFA_0001438]
ZFIN:ZDB-GENE-070117-940	unm t30975	209	0.0140231	184	0.116751	204	1.23018	207	2.26462	[UBERON:FMA_85006-MA_0002447-ZFA_0001438]
ZFIN:ZDB-GENE-070117-939	unm t30974	209	0.0140231	184	0.116751	204	1.23018	207	2.26462	[UBERON:FMA_85006-MA_0002447-ZFA_0001438]
ZFIN:ZDB-GENE-070117-938	unm t30796	209	0.0140231	184	0.116751	204	1.23018	207	2.26462	[UBERON:FMA_85006-MA_0002447-ZFA_0001438]
ZFIN:ZDB-GENE-070117-934	unm t30976	209	0.0140231	184	0.116751	204	1.23018	207	2.26462	[UBERON:FMA_85006-MA_0002447-ZFA_0001438]
ZFIN:ZDB-GENE-070117-930	unm t30808	209	0.0140231	184	0.116751	204	1.23018	207	2.26462	[UBERON:FMA_85006-MA_0002447-ZFA_0001438]
ZFIN:ZDB-GENE-070117-921	unm t30973	209	0.0140231	184	0.116751	204	1.23018	207	2.26462	[UBERON:FMA_85006-MA_0002447-ZFA_0001438]
ZFIN:ZDB-GENE-070117-919	unm t30807	209	0.0140231	184	0.116751	204	1.23018	207	2.26462	[UBERON:FMA_85006-MA_0002447-ZFA_0001438]
ZFIN:ZDB-GENE-070117-908	unm t30804	209	0.0140231	184	0.116751	204	1.23018	207	2.26462	[UBERON:FMA_85006-MA_0002447-ZFA_0001438]
ZFIN:ZDB-GENE-070117-897	unm t30798	209	0.0140231	184	0.116751	204	1.23018	207	2.26462	[UBERON:FMA_85006-MA_0002447-ZFA_0001438]
ZFIN:ZDB-GENE-070117-1628	unm t31180	209	0.0140231	184	0.116751	204	1.23018	207	2.26462	[UBERON:FMA_85006-MA_0002447-ZFA_0001438]
ZFIN:ZDB-GENE-070117-1627	unm t31173	209	0.0140231	184	0.116751	204	1.23018	207	2.26462	[UBERON:FMA_85006-MA_0002447-ZFA_0001438]
ZFIN:ZDB-GENE-070117-1626	unm t31171	209	0.0140231	184	0.116751	204	1.23018	207	2.26462	[UBERON:FMA_85006-MA_0002447-ZFA_0001438]
ZFIN:ZDB-GENE-070117-1625	unm t31134	209	0.0140231	184	0.116751	204	1.23018	207	2.26462	[UBERON:FMA_85006-MA_0002447-ZFA_0001438]
ZFIN:ZDB-GENE-070117-1624	unm t31131	209	0.0140231	184	0.116751	204	1.23018	207	2.26462	[UBERON:FMA_85006-MA_0002447-ZFA_0001438]
ZFIN:ZDB-GENE-070117-1623	unm t31130	209	0.0140231	184	0.116751	204	1.23018	207	2.26462	[UBERON:FMA_85006-MA_0002447-ZFA_0001438]
ZFIN:ZDB-GENE-070117-1541	unm t30794	209	0.0140231	184	0.116751	204	1.23018	207	2.26462	[UBERON:FMA_85006-MA_0002447-ZFA_0001438]
ZFIN:ZDB-GENE-070117-1484	unm t30803	209	0.0140231	184	0.116751	204	1.23018	207	2.26462	[UBERON:FMA_85006-MA_0002447-ZFA_0001438]
ZFIN:ZDB-GENE-070117-1482	unm t30881	209	0.0140231	184	0.116751	204	1.23018	207	2.26462	[UBERON:FMA_85006-MA_0002447-ZFA_0001438]
ZFIN:ZDB-GENE-070117-1481	unm t30797	209	0.0140231	184	0.116751	204	1.23018	207	2.26462	[UBERON:FMA_85006-MA_0002447-ZFA_0001438]
ZFIN:ZDB-GENE-070117-1480	unm t30977	209	0.0140231	184	0.116751	204	1.23018	207	2.26462	[UBERON:FMA_85006-MA_0002447-ZFA_0001438]
ZFIN:ZDB-GENE-070117-1479	unm t30970	209	0.0140231	184	0.116751	204	1.23018	207	2.26462	[UBERON:FMA_85006-MA_0002447-ZFA_0001438]
ZFIN:ZDB-GENE-070117-1478	unm t30842	209	0.0140231	184	0.116751	204	1.23018	207	2.26462	[UBERON:FMA_85006-MA_0002447-ZFA_0001438]
ZFIN:ZDB-GENE-070117-1241	unm t30971	209	0.0140231	184	0.116751	204	1.23018	207	2.26462	[UBERON:FMA_85006-MA_0002447-ZFA_0001438]
ZFIN:ZDB-GENE-070117-1119	unm t30972	209	0.0140231	184	0.116751	204	1.23018	207	2.26462	[UBERON:FMA_85006-MA_0002447-ZFA_0001438]
ZFIN:ZDB-GENE-070117-1107	unm t30969	209	0.0140231	184	0.116751	204	1.23018	207	2.26462	[UBERON:FMA_85006-MA_0002447-ZFA_0001438]
ZFIN:ZDB-GENE-070117-1096	unm t30898	209	0.0140231	184	0.116751	204	1.23018	207	2.26462	[UBERON:FMA_85006-MA_0002447-ZFA_0001438]
ZFIN:ZDB-GENE-070117-1085	unm t30897	209	0.0140231	184	0.116751	204	1.23018	207	2.26462	[UBERON:FMA_85006-MA_0002447-ZFA_0001438]
ZFIN:ZDB-GENE-070117-1074	unm t30880	209	0.0140231	184	0.116751	204	1.23018	207	2.26462	[UBERON:FMA_85006-MA_0002447-ZFA_0001438]
ZFIN:ZDB-GENE-070117-1063	unm t30879	209	0.0140231	184	0.116751	204	1.23018	207	2.26462	[UBERON:FMA_85006-MA_0002447-ZFA_0001438]
ZFIN:ZDB-GENE-070117-1052	unm t30878	209	0.0140231	184	0.116751	204	1.23018	207	2.26462	[UBERON:FMA_85006-MA_0002447-ZFA_0001438]
ZFIN:ZDB-GENE-070117-1041	unm t30877	209	0.0140231	184	0.116751	204	1.23018	207	2.26462	[UBERON:FMA_85006-MA_0002447-ZFA_0001438]
ZFIN:ZDB-GENE-070117-1030	unm t30876	209	0.0140231	184	0.116751	204	1.23018	207	2.26462	[UBERON:FMA_85006-MA_0002447-ZFA_0001438]
ZFIN:ZDB-GENE-070117-1020	unm t30795	209	0.0140231	184	0.116751	204	1.23018	207	2.26462	[UBERON:FMA_85006-MA_0002447-ZFA_0001438]
ZFIN:ZDB-GENE-070117-1019	unm t30875	209	0.0140231	184	0.116751	204	1.23018	207	2.26462	[UBERON:FMA_85006-MA_0002447-ZFA_0001438]
ZFIN:ZDB-GENE-070117-1008	unm t30874	209	0.0140231	184	0.116751	204	1.23018	207	2.26462	[UBERON:FMA_85006-MA_0002447-ZFA_0001438]
ZFIN:ZDB-GENE-070117-2122	hel	250	0.0139406	236	0.115385	246	1.09845	207	2.26462	[UBERON:FMA_85006-MA_0002447-ZFA_0001438]
