# Supplementary material for: Linking Human Diseases to Animal Models Using Ontology-Based Phenotype Annotation
Source: PLoS Biol. 2009 Nov 24;7(11):e1000247. doi: 10.1371/journal.pbio.1000247 (PMC2774506; doi:10.1371/journal.pbio.1000247)
Supplement: Table S9 — Comparison between human SOX10 and zebrafish genes. The top 250 genes (by simJ) are reported, together with the rank and score for each metric (simIC, simJ, avgICCS, and maxIC). Additionally, the maxIC phenotype is reported using ontology identifiers. See Materials and Methods for a list of ontology prefixes. Known sequence orthologs are highlighted in yellow and listed in Table 6, if present. Genes at rank 1 are listed in Table 7. (0.09 MB XLS) [file pbio.1000247.s009.xls]

## Sheet: NCBI_Gene_6663-vs-allg-allscore
zfin gene id	zfin gene name	simIC rank	simIC	simJ rank	simJ	avgICCS rank	avgICCS	maxIC rank	maxIC	maxIC phenotype
ZFIN:ZDB-GENE-011207-1	sox10	1	0.0603405	2	0.125755	1	5.38194	1	12.7338	[GO:0014037, GO:0014044, GO:0032288]
ZFIN:ZDB-GENE-030404-2	mib	2	0.0493804	1	0.127101	9	4.14459	31	10.5638	[PATO:0000001^OBO_REL:inheres_in(UBERON:FBbt_00005094-FMA_55675-MA_0000167-XAO_0000215-ZFA_0000012)]
ZFIN:ZDB-GENE-020419-32	hdac1	3	0.0480313	3	0.119074	5	4.45435	7	12.1488	[PATO:0000420^OBO_REL:inheres_in(UBERON:CL_0000148-FMA_70545-XAO_0001014-ZFA_0009091), PATO:0000470^OBO_REL:inheres_in(UBERON:CL_0000148-FMA_70545-XAO_0001014-ZFA_0009091)]
ZFIN:ZDB-GENE-011212-6	tfap2a	4	0.0459785	6	0.103355	2	4.63279	1	12.7338	[PATO:0000462^OBO_REL:inheres_in(UBERON:FBbt_00005137-FMA_5884-FMA_5888-MA_0000232-MA_0002406-MIAA_0000162-MIAA_0000207-MIAA_0000343-WBbt_0005189-XAO_0000209-XAO_0000210-ZFA_0000190-ZFA_0000200), PATO:0001483^OBO_REL:inheres_in(UBERON:FBbt_00005137-FMA_5884-FMA_5888-MA_0000232-MA_0002406-MIAA_0000162-MIAA_0000207-MIAA_0000343-WBbt_0005189-XAO_0000209-XAO_0000210-ZFA_0000190-ZFA_0000200)]
ZFIN:ZDB-GENE-010906-1	ache	5	0.0395839	4	0.114653	4	4.47559	1	12.7338	[PATO:0000304]
ZFIN:ZDB-GENE-990415-171	cdh2	6	0.0365257	5	0.111221	16	3.78956	73	8.21019	[PATO:0000600]
ZFIN:ZDB-GENE-080530-2	vps39	7	0.0363921	8	0.0990621	3	4.52074	12	11.7338	[WBPhenotype:0000521]
ZFIN:ZDB-GENE-990415-8	pax2a	8	0.0356591	12	0.0960722	6	4.41327	7	12.1488	[PATO:0000141^inheres_in_part_of(UBERON:FMA_45615-MA_0000917-ZFA_0000112)]
ZFIN:ZDB-GENE-990712-18	eya1	9	0.0339912	10	0.0976139	12	3.87765	46	9.64629	[PATO:0001905]
ZFIN:ZDB-GENE-980526-143	foxd3	10	0.0332408	36	0.0837264	8	4.18838	7	12.1488	[PATO:0000419^OBO_REL:inheres_in(UBERON:FBbt_00005137-FMA_5884-FMA_5888-MA_0000232-MA_0002406-MIAA_0000162-MIAA_0000207-MIAA_0000343-WBbt_0005189-XAO_0000209-XAO_0000210-ZFA_0000190-ZFA_0000200), PATO:0000420^OBO_REL:inheres_in(UBERON:CL_0000148-FMA_70545-XAO_0001014-ZFA_0009091), PATO:0000470^OBO_REL:inheres_in(UBERON:CL_0000148-FMA_70545-XAO_0001014-ZFA_0009091), PATO:0001997^OBO_REL:inheres_in…
ZFIN:ZDB-GENE-000201-18	pbx4	11	0.0323728	7	0.101723	33	3.44429	1	12.7338	[PATO:0000001^OBO_REL:inheres_in(UBERON:FMA_86666-MIAA_0000066-XAO_0000048-ZFA_0000045)]
ZFIN:ZDB-GENE-990415-72	fgf8a	12	0.031752	18	0.0923913	14	3.80622	18	11.1488	[GO:0007422, GO:0048485, GO:0048486]
ZFIN:ZDB-GENE-980526-464	kita	13	0.0316987	57	0.0753031	10	4.04459	18	11.1488	[PATO:0000462^OBO_REL:inheres_in(UBERON:CL_0000147-MIAA_0000159-XAO_0003014-ZFA_0009090), PATO:0000462^OBO_REL:inheres_in(UBERON:CL_0000148-FMA_70545-XAO_0001014-ZFA_0009091), PATO:0001483^OBO_REL:inheres_in(UBERON:CL_0000148-FMA_70545-XAO_0001014-ZFA_0009091)]
ZFIN:ZDB-GENE-980526-166	shha	14	0.0311155	11	0.0962788	25	3.58867	100	7.3762	[PATO:0000468^OBO_REL:has_qualifier(PATO:0000460)^OBO_REL:inheres_in(GO:0050881)]
ZFIN:ZDB-GENE-021115-2	trpm7	15	0.030954	32	0.0844327	18	3.7455	16	11.4118	[PATO:0000337]
ZFIN:ZDB-GENE-040426-1947	chaf1b	16	0.0301544	20	0.0911782	36	3.41437	57	9.0899	[PATO:0000462^OBO_REL:towards(UBERON:CARO_0000013-CL_0000000-FBbt_00007002-FMA_68646-XAO_0003012-ZFA_0009000)]
ZFIN:ZDB-GENE-980526-89	smo	17	0.0295074	22	0.0897143	20	3.69263	7	12.1488	[GO:0048709]
ZFIN:ZDB-GENE-011105-1	prkci	18	0.0291266	16	0.0944931	48	3.31731	119	7.25802	[PATO:0001608]
ZFIN:ZDB-GENE-990706-8	gli2a	19	0.028723	17	0.0924821	40	3.35099	125	6.88827	[PATO:0001507]
ZFIN:ZDB-GENE-070117-2049	fad	20	0.0286367	31	0.0845426	17	3.77926	57	9.0899	[PATO:0000467, PATO:0000462^OBO_REL:towards(UBERON:CARO_0000013-CL_0000000-FBbt_00007002-FMA_68646-XAO_0003012-ZFA_0009000)]
ZFIN:ZDB-GENE-070426-2	mko	21	0.0285445	34	0.0842697	29	3.52687	57	9.0899	[PATO:0000462^OBO_REL:towards(UBERON:CARO_0000013-CL_0000000-FBbt_00007002-FMA_68646-XAO_0003012-ZFA_0009000)]
ZFIN:ZDB-GENE-051113-132	cdc16	22	0.0283979	14	0.0949721	26	3.58665	18	11.1488	[PATO:0001999^OBO_REL:towards(GO:0032502)]
ZFIN:ZDB-GENE-020104-1	hnf1b	23	0.0278423	28	0.0850254	11	3.9044	7	12.1488	[PATO:0000141^inheres_in_part_of(UBERON:FMA_45615-MA_0000917-ZFA_0000112)]
ZFIN:ZDB-GENE-070117-2032	alb	24	0.0278367	23	0.0887612	19	3.70902	16	11.4118	[PATO:0000337]
ZFIN:ZDB-GENE-060718-1	rerea	25	0.0276739	25	0.0869565	28	3.53948	144	6.70033	[PATO:0000462^inheres_in_part_of(UBERON:FBbt_00000004-FBbt_00003007-FMA_46565-FMA_7154-FMA_87596-MA_0000023-MA_0000316-MIAA_0000017-MIAA_0000149-MIAA_0000294-MIAA_0000340-WBbt_0005739-XAO_0003024-ZFA_0000737-ZFA_0001114)]
ZFIN:ZDB-GENE-040426-2169	spint1a	26	0.0274076	29	0.0850202	13	3.81717	12	11.7338	[PATO:0000008]
ZFIN:ZDB-GENE-021226-1	lamb1	27	0.0272207	21	0.0901889	35	3.41921	37	9.82687	[PATO:0001508]
ZFIN:ZDB-GENE-030131-6223	sufu	28	0.0270994	13	0.0959459	191	2.52212	83	7.82687	[PATO:0000587^inheres_in_part_of(UBERON:FMA_12513-MIAA_0000283-XAO_0000181)]
ZFIN:ZDB-GENE-980526-330	cdx4	29	0.0270741	42	0.0805604	27	3.5611	33	10.1488	[ZFA:0001338]
ZFIN:ZDB-GENE-070514-1	dry	30	0.0269217	9	0.0979381	102	2.8596	120	7.03332	[GO:0005634]
ZFIN:ZDB-GENE-980526-196	ptc2	31	0.0268508	44	0.0802274	38	3.38194	46	9.64629	[PATO:0001905]
ZFIN:ZDB-GENE-021226-3	lamc1	32	0.0268167	24	0.0876446	52	3.28169	37	9.82687	[PATO:0001508]
ZFIN:ZDB-GENE-980526-44	ptc1	33	0.0267824	45	0.0798479	37	3.40686	46	9.64629	[PATO:0001905]
ZFIN:ZDB-GENE-030318-2	chm	34	0.0267291	40	0.0817369	15	3.80279	12	11.7338	[WBPhenotype:0000521]
ZFIN:ZDB-GENE-060118-1	lama1	35	0.0264284	19	0.0923645	80	3.0025	144	6.70033	[PATO:0000462^inheres_in_part_of(UBERON:FBbt_00000004-FBbt_00003007-FMA_46565-FMA_7154-FMA_87596-MA_0000023-MA_0000316-MIAA_0000017-MIAA_0000149-MIAA_0000294-MIAA_0000340-WBbt_0005739-XAO_0003024-ZFA_0000737-ZFA_0001114)]
ZFIN:ZDB-GENE-070117-2413	sri(l)	36	0.0261112	15	0.0945205	210	2.454	83	7.82687	[PATO:0000587^inheres_in_part_of(UBERON:FMA_12513-MIAA_0000283-XAO_0000181)]
ZFIN:ZDB-GENE-980526-178	fgf3	37	0.0260302	41	0.0811321	46	3.32589	18	11.1488	[GO:0007422, GO:0048485, GO:0048486]
ZFIN:ZDB-GENE-020507-3	vangl2	38	0.0255091	33	0.0842849	54	3.26325	73	8.21019	[PATO:0000600]
ZFIN:ZDB-GENE-060503-416	slc17a8	39	0.0255064	38	0.0827315	56	3.24451	37	9.82687	[PATO:0001508]
ZFIN:ZDB-GENE-030131-994	rad21	40	0.0252021	35	0.0840125	53	3.27215	120	7.03332	[GO:0005634]
ZFIN:ZDB-GENE-020419-39	stil	41	0.0250286	47	0.079375	43	3.34215	25	10.9264	[PATO:0000616]
ZFIN:ZDB-GENE-990415-198	oep	42	0.0249886	51	0.0773672	30	3.51238	18	11.1488	[GO:0007422, GO:0048485, GO:0048486]
ZFIN:ZDB-GENE-980526-501	tal1	43	0.0249497	27	0.0851964	24	3.59426	57	9.0899	[PATO:0000462^OBO_REL:towards(UBERON:CARO_0000013-CL_0000000-FBbt_00007002-FMA_68646-XAO_0003012-ZFA_0009000)]
ZFIN:ZDB-GENE-070117-2511	cho	44	0.0246716	74	0.0690491	21	3.63548	53	9.48583	[PATO:0000419^OBO_REL:inheres_in(UBERON:CL_0000148-FMA_70545-XAO_0001014-ZFA_0009091), PATO:0000468^OBO_REL:inheres_in(UBERON:CL_0000148-FMA_70545-XAO_0001014-ZFA_0009091), PATO:0001997^OBO_REL:inheres_in(UBERON:CL_0000148-FMA_70545-XAO_0001014-ZFA_0009091)]
ZFIN:ZDB-GENE-070117-2066	flr	45	0.024213	37	0.0831281	55	3.24488	125	6.88827	[PATO:0001507]
ZFIN:ZDB-GENE-990910-11	mitfa	46	0.0240291	186	0.0518713	7	4.21707	18	11.1488	[PATO:0000462^OBO_REL:inheres_in(UBERON:CL_0000147-MIAA_0000159-XAO_0003014-ZFA_0009090), PATO:0000462^OBO_REL:inheres_in(UBERON:CL_0000148-FMA_70545-XAO_0001014-ZFA_0009091), PATO:0001483^OBO_REL:inheres_in(UBERON:CL_0000148-FMA_70545-XAO_0001014-ZFA_0009091)]
ZFIN:ZDB-GENE-040822-18	cdc26	47	0.0238382	26	0.0867347	71	3.06599	25	10.9264	[PATO:0000587^inheres_in_part_of(UBERON:FBbt_00004200-FMA_58301-MA_0000276-MIAA_0000142-XAO_0000009-ZFA_0000152)]
ZFIN:ZDB-GENE-040426-1664	pde6c	48	0.0238042	48	0.0778443	59	3.18354	37	9.82687	[PATO:0001508]
ZFIN:ZDB-GENE-040426-2452	sfpq	49	0.0232529	30	0.0845679	76	3.02785	174	5.98556	[PATO:0000760]
ZFIN:ZDB-GENE-070427-3	kmi	50	0.0232005	64	0.0726552	65	3.14297	57	9.0899	[PATO:0000462^OBO_REL:towards(UBERON:CARO_0000013-CL_0000000-FBbt_00007002-FMA_68646-XAO_0003012-ZFA_0009000)]
ZFIN:ZDB-GENE-030131-2887	polr3b	51	0.0231368	68	0.0715215	31	3.47657	33	10.1488	[ZFA:0001338]
ZFIN:ZDB-GENE-990415-181	ndr2	52	0.0228722	54	0.0766401	66	3.13345	46	9.64629	[PATO:0001905]
ZFIN:ZDB-GENE-030131-7949	supt6h	53	0.0228134	43	0.0804668	62	3.16503	37	9.82687	[PATO:0001508]
ZFIN:ZDB-GENE-040426-2854	skiv2l2	54	0.0227511	58	0.0749494	112	2.8043	53	9.48583	[PATO:0000419^OBO_REL:inheres_in(UBERON:CL_0000148-FMA_70545-XAO_0001014-ZFA_0009091), PATO:0000468^OBO_REL:inheres_in(UBERON:CL_0000148-FMA_70545-XAO_0001014-ZFA_0009091), PATO:0001997^OBO_REL:inheres_in(UBERON:CL_0000148-FMA_70545-XAO_0001014-ZFA_0009091)]
ZFIN:ZDB-GENE-070117-2326	roy	55	0.0224416	114	0.0579614	23	3.60366	18	11.1488	[PATO:0000462^OBO_REL:inheres_in(UBERON:CL_0000147-MIAA_0000159-XAO_0003014-ZFA_0009090), PATO:0000462^OBO_REL:inheres_in(UBERON:CL_0000148-FMA_70545-XAO_0001014-ZFA_0009091), PATO:0001483^OBO_REL:inheres_in(UBERON:CL_0000148-FMA_70545-XAO_0001014-ZFA_0009091)]
ZFIN:ZDB-GENE-070423-1	gfpt1	56	0.0223194	73	0.0693985	72	3.05649	53	9.48583	[PATO:0000419^OBO_REL:inheres_in(UBERON:CL_0000148-FMA_70545-XAO_0001014-ZFA_0009091), PATO:0000468^OBO_REL:inheres_in(UBERON:CL_0000148-FMA_70545-XAO_0001014-ZFA_0009091), PATO:0001997^OBO_REL:inheres_in(UBERON:CL_0000148-FMA_70545-XAO_0001014-ZFA_0009091)]
ZFIN:ZDB-GENE-001103-1	sox9a	57	0.0222481	63	0.0732229	22	3.63282	46	9.64629	[PATO:0001905]
ZFIN:ZDB-GENE-070117-2327	ruz	58	0.0221253	49	0.077688	68	3.11139	81	7.90087	[PATO:0000001^OBO_REL:has_qualifier(PATO:0000460)^OBO_REL:inheres_in(GO:0007626)]
ZFIN:ZDB-GENE-990603-12	wnt11	59	0.0219635	61	0.0739662	49	3.29279	73	8.21019	[PATO:0000600]
ZFIN:ZDB-GENE-040426-2784	sass6	60	0.0219603	39	0.0823681	131	2.71213	88	7.54393	[PATO:0000001^inheres_in_part_of(UBERON:FMA_45615-MA_0000917-ZFA_0000112)]
ZFIN:ZDB-GENE-030616-594	plcb3	61	0.0217226	71	0.0699563	47	3.3183	70	8.3762	[PATO:0001241^inheres_in_part_of(UBERON:FMA_45615-MA_0000917-ZFA_0000112)]
ZFIN:ZDB-GENE-020919-3	unc45b	62	0.0214857	60	0.0745981	50	3.28663	37	9.82687	[PATO:0001508]
ZFIN:ZDB-GENE-011119-1	kny	63	0.0214509	56	0.0762759	61	3.18193	73	8.21019	[PATO:0000600]
ZFIN:ZDB-GENE-030321-1	gli1	64	0.0213702	53	0.0769231	111	2.80549	125	6.88827	[PATO:0001507]
ZFIN:ZDB-GENE-070117-2515	clo	65	0.0210864	76	0.0685608	44	3.33518	57	9.0899	[PATO:0000462^OBO_REL:towards(UBERON:CARO_0000013-CL_0000000-FBbt_00007002-FMA_68646-XAO_0003012-ZFA_0009000)]
ZFIN:ZDB-GENE-980526-137	chrna1	66	0.0210044	46	0.0793754	90	2.92444	53	9.48583	[PATO:0000763]
ZFIN:ZDB-GENE-980526-87	wnt5b	67	0.0208761	50	0.0775558	58	3.21412	73	8.21019	[PATO:0000600]
ZFIN:ZDB-GENE-030131-6778	rtf1	68	0.0205713	55	0.0765206	118	2.78959	37	9.82687	[PATO:0001508]
ZFIN:ZDB-GENE-980526-437	ntl	69	0.0205281	69	0.071048	60	3.18213	46	9.64629	[PATO:0001905]
ZFIN:ZDB-GENE-060119-1	lama2	70	0.0202883	82	0.0654879	39	3.36446	79	7.97887	[PATO:0001780]
ZFIN:ZDB-GENE-040724-10	sart3	71	0.0201742	72	0.0697674	51	3.28222	25	10.9264	[GO:0065003]
ZFIN:ZDB-GENE-070117-741	chy	72	0.0201447	80	0.0663475	95	2.89853	88	7.54393	[PATO:0000001^inheres_in_part_of(UBERON:FMA_45615-MA_0000917-ZFA_0000112)]
ZFIN:ZDB-GENE-030715-1	fgf10a	73	0.0200058	103	0.0596115	45	3.33197	33	10.1488	[ZFA:0001338]
ZFIN:ZDB-GENE-041124-2	extl3	74	0.0199022	52	0.0772251	109	2.80961	100	7.3762	[PATO:0000468^OBO_REL:has_qualifier(PATO:0000460)^OBO_REL:inheres_in(GO:0050881)]
ZFIN:ZDB-GENE-020712-1	mpp5a	75	0.0198002	62	0.0733464	85	2.9569	180	5.88827	[ZFA:0000112]
ZFIN:ZDB-GENE-000403-1	axin1	76	0.0195438	59	0.0746562	125	2.74815	125	6.88827	[PATO:0001507]
ZFIN:ZDB-GENE-070117-512	grb	77	0.0194314	66	0.0719115	108	2.81751	68	8.9264	[PATO:0000965]
ZFIN:ZDB-GENE-040426-2039	uhrf1	78	0.0192511	65	0.0722581	103	2.85482	125	6.88827	[PATO:0001507]
ZFIN:ZDB-GENE-070117-2223	nev	79	0.0192099	67	0.07167	87	2.95132	100	7.3762	[PATO:0000468^OBO_REL:has_qualifier(PATO:0000460)^OBO_REL:inheres_in(GO:0050881)]
ZFIN:ZDB-GENE-030911-7	disp1	80	0.0190456	75	0.0690096	119	2.78939	221	5.539	[PATO:0000406]
ZFIN:ZDB-GENE-070427-4	pno	81	0.0187919	91	0.0632746	69	3.08758	68	8.9264	[PATO:0000965]
ZFIN:ZDB-GENE-070117-1989	kiaa1279	82	0.0187645	78	0.0675505	34	3.43353	25	10.9264	[GO:0048483]
ZFIN:ZDB-GENE-031210-1	slc24a5	83	0.0187154	96	0.0619112	32	3.46241	25	10.9264	[PATO:0000014^inheres_in_part_of(UBERON:FBbt_00004508-FMA_54448-MA_0000261-MIAA_0000140-XAO_0000179-ZFA_0000107)]
ZFIN:ZDB-GENE-030131-3827	eif3ea	84	0.0186057	84	0.0652877	57	3.23695	125	6.88827	[PATO:0001507]
ZFIN:ZDB-GENE-980526-485	pou5f1	85	0.0185904	70	0.0704739	77	3.02457	125	6.88827	[PATO:0001507]
ZFIN:ZDB-GENE-990415-33	chd	86	0.0185183	81	0.06613	99	2.88226	152	6.64629	[PATO:0000646]
ZFIN:ZDB-GENE-040526-1	dzip1	87	0.0183393	98	0.061144	74	3.03813	159	6.23391	[PATO:0000628]
ZFIN:ZDB-GENE-041212-49	arhgef7b	88	0.0182165	86	0.0645756	67	3.11464	57	9.0899	[PATO:0000462^OBO_REL:towards(UBERON:CARO_0000013-CL_0000000-FBbt_00007002-FMA_68646-XAO_0003012-ZFA_0009000)]
ZFIN:ZDB-GENE-031125-3	rbm19	89	0.0181494	85	0.0648649	64	3.14692	57	9.0899	[PATO:0000467]
ZFIN:ZDB-GENE-060125-1	med12	90	0.0181101	77	0.0684211	86	2.9526	125	6.88827	[PATO:0001507]
ZFIN:ZDB-GENE-991110-8	tcf7l2	91	0.0179086	169	0.0527397	42	3.34281	1	12.7338	[UBERON:FMA_15072-ZFA_0005125]
ZFIN:ZDB-GENE-070117-1563	dhv	92	0.0178772	79	0.0671186	98	2.88493	100	7.3762	[PATO:0000468^OBO_REL:has_qualifier(PATO:0000460)^OBO_REL:inheres_in(GO:0050881)]
ZFIN:ZDB-GENE-020905-1	atp2a1	93	0.0176396	87	0.0643001	94	2.90586	100	7.3762	[PATO:0000468^OBO_REL:has_qualifier(PATO:0000460)^OBO_REL:inheres_in(GO:0050881)]
ZFIN:ZDB-GENE-070117-2175	lok	94	0.0175937	94	0.0627329	100	2.87376	150	6.68936	[UBERON:0000004]
ZFIN:ZDB-GENE-980526-474	bmp2b	95	0.0173991	106	0.0593166	104	2.84945	70	8.3762	[PATO:0001241^inheres_in_part_of(UBERON:FMA_45615-MA_0000917-ZFA_0000112)]
ZFIN:ZDB-GENE-001212-1	atp1a1	96	0.0173922	88	0.0641711	106	2.83854	180	5.88827	[ZFA:0000112]
ZFIN:ZDB-GENE-070117-2365	bch	97	0.0172438	96	0.0619112	110	2.8075	144	6.70033	[PATO:0000049]
ZFIN:ZDB-GENE-071205-1	kof	98	0.017196	105	0.0593276	81	2.99838	122	7.00584	[PATO:0000051^OBO_REL:inheres_in(UBERON:CL_0000100-FBbt_00005123-FMA_83617-WBbt_0005409-ZFA_0009052)]
ZFIN:ZDB-GENE-020419-23	atp6v0c	99	0.016824	104	0.0594595	88	2.94336	125	6.88827	[PATO:0001507]
ZFIN:ZDB-GENE-070117-39	gin10	100	0.0168221	147	0.0540906	63	3.1621	33	10.1488	[ZFA:0001338]
ZFIN:ZDB-GENE-041124-3	ext2	101	0.0167132	83	0.0654762	175	2.58434	226	5.49535	[GO:0022008]
ZFIN:ZDB-GENE-990415-256	ndr1	102	0.0167034	120	0.0575758	89	2.93056	46	9.64629	[PATO:0001905]
ZFIN:ZDB-GENE-030616-132	mycbp2	103	0.0166908	90	0.0632911	123	2.76908	160	6.17917	[absent_slim]
ZFIN:ZDB-GENE-070117-13	glw	104	0.0166349	161	0.0533784	73	3.04284	81	7.90087	[PATO:0000921]
ZFIN:ZDB-GENE-001207-1	supt5h	105	0.0164795	102	0.0602165	167	2.59473	124	6.9264	[PATO:0000001^OBO_REL:inheres_in(UBERON:CL_0000100-FBbt_00005123-FMA_83617-WBbt_0005409-ZFA_0009052)]
ZFIN:ZDB-GENE-990415-238	rx3	106	0.0163815	119	0.0576408	117	2.78962	125	6.88827	[PATO:0001507]
ZFIN:ZDB-GENE-070117-676	mgf	107	0.0162727	137	0.0552147	130	2.72171	83	7.82687	[PATO:0000587^inheres_in_part_of(UBERON:FMA_12513-MIAA_0000283-XAO_0000181)]
ZFIN:ZDB-GENE-020418-2	sec61al1	108	0.0162554	108	0.0588629	113	2.80269	180	5.88827	[ZFA:0000112]
ZFIN:ZDB-GENE-070117-78	sff	109	0.0162263	107	0.0589445	155	2.62419	88	7.54393	[PATO:0000001^inheres_in_part_of(UBERON:FMA_45615-MA_0000917-ZFA_0000112)]
ZFIN:ZDB-GENE-030131-8646	rpl9	110	0.0162041	115	0.0578512	174	2.58504	88	7.54393	[PATO:0000001^inheres_in_part_of(UBERON:FMA_45615-MA_0000917-ZFA_0000112)]
ZFIN:ZDB-GENE-030131-8663	rplp1	111	0.016193	117	0.0577717	177	2.5788	88	7.54393	[PATO:0000001^inheres_in_part_of(UBERON:FMA_45615-MA_0000917-ZFA_0000112)]
ZFIN:ZDB-GENE-070426-3	alo	112	0.0161363	101	0.0603113	133	2.70201	163	6.0899	[UBERON:FMA_61022-MA_0000242-XAO_0000194]
ZFIN:ZDB-GENE-070117-84	jaw	113	0.0159987	173	0.0524881	147	2.63717	88	7.54393	[PATO:0000001^inheres_in_part_of(UBERON:FMA_45615-MA_0000917-ZFA_0000112)]
ZFIN:ZDB-GENE-030131-6458	musk	114	0.0159171	93	0.0629508	122	2.77052	25	10.9264	[GO:0065003]
ZFIN:ZDB-GENE-040426-1146	traf3ip1	115	0.0158331	92	0.0629921	135	2.69745	125	6.88827	[PATO:0001507]
ZFIN:ZDB-GENE-040624-5	ctcf	116	0.0157808	99	0.0607477	136	2.69662	160	6.17917	[absent_slim]
ZFIN:ZDB-GENE-071022-1	ophelia	117	0.0157677	118	0.0576527	179	2.55899	72	8.34144	[GO:0048519]
ZFIN:ZDB-GENE-030131-2281	col4a5	118	0.0157032	89	0.0637066	121	2.77121	157	6.51459	[PATO:0001617]
ZFIN:ZDB-GENE-990415-9	acvr1	119	0.0156514	100	0.0603725	107	2.81888	37	9.82687	[PATO:0001508]
ZFIN:ZDB-GENE-070705-417	ryr1b	120	0.0155787	214	0.0506912	41	3.34377	57	9.0899	[PATO:0000462^OBO_REL:towards(UBERON:CARO_0000013-CL_0000000-FBbt_00007002-FMA_68646-XAO_0003012-ZFA_0009000)]
ZFIN:ZDB-GENE-070117-2285	pun	121	0.0155552	125	0.056516	115	2.7929	144	6.70033	[PATO:0000049]
ZFIN:ZDB-GENE-060825-45	atp7a	122	0.0154398	129	0.0561653	84	2.95872	125	6.88827	[PATO:0001507]
ZFIN:ZDB-GENE-030131-4827	hhip	123	0.0154191	128	0.0562331	105	2.8464	78	8.17917	[PATO:0000001^inheres_in_part_of(UBERON:FMA_58235-MA_0000273-XAO_0000185-ZFA_0001238)]
ZFIN:ZDB-GENE-040426-2140	nol5	124	0.0152547	122	0.0569705	120	2.77855	180	5.88827	[ZFA:0000112]
ZFIN:ZDB-GENE-070117-632	shy	125	0.0150016	141	0.0545455	97	2.8962	32	10.4118	[PATO:0001906]
ZFIN:ZDB-GENE-010614-1	cxcr4b	126	0.0150006	121	0.057067	101	2.86582	98	7.5243	[UBERON:FMA_45661-MA_0000442]
ZFIN:ZDB-GENE-070117-75	puo	127	0.0149967	131	0.0558964	196	2.51439	88	7.54393	[PATO:0000001^inheres_in_part_of(UBERON:FMA_45615-MA_0000917-ZFA_0000112)]
ZFIN:ZDB-GENE-070117-740	bgm	128	0.0149951	202	0.0513532	129	2.72501	88	7.54393	[PATO:0000001^inheres_in_part_of(UBERON:FMA_45615-MA_0000917-ZFA_0000112)]
ZFIN:ZDB-GENE-030616-554	slc17a6	129	0.0149158	109	0.0587842	161	2.60612	220	5.68391	[PATO:0000051^inheres_in_part_of(UBERON:FBbt_00004200-FMA_58301-MA_0000276-MIAA_0000142-XAO_0000009-ZFA_0000152)]
ZFIN:ZDB-GENE-050616-5	cx36.7	130	0.0148096	110	0.0587167	92	2.91174	57	9.0899	[PATO:0000462^OBO_REL:towards(UBERON:CARO_0000013-CL_0000000-FBbt_00007002-FMA_68646-XAO_0003012-ZFA_0009000)]
ZFIN:ZDB-GENE-030530-1	szl	131	0.0147662	132	0.0556978	132	2.70473	152	6.64629	[PATO:0000646]
ZFIN:ZDB-GENE-070117-786	unm p32cqeg	132	0.0147328	116	0.0577957	208	2.47425	226	5.49535	[GO:0022008]
ZFIN:ZDB-GENE-070117-521	unm ti205	133	0.0147328	135	0.0555184	165	2.59609	219	5.68936	[PATO:0000001^OBO_REL:inheres_in(UBERON:CL_0000148-FMA_70545-XAO_0001014-ZFA_0009091), UBERON:CL_0000148-FMA_70545-XAO_0001014-ZFA_0009091]
ZFIN:ZDB-GENE-071108-1	psoriasis	134	0.0147118	127	0.0563758	140	2.67579	1	12.7338	[PATO:0000420^OBO_REL:inheres_in(UBERON:CL_0000362-FMA_62411-ZFA_0009183), PATO:0000470^OBO_REL:inheres_in(UBERON:CL_0000362-FMA_62411-ZFA_0009183)]
ZFIN:ZDB-GENE-990415-22	dharma	135	0.0147032	123	0.0568843	137	2.68641	152	6.64629	[PATO:0000646]
ZFIN:ZDB-GENE-040426-1600	mlh1	136	0.0147015	201	0.0513761	82	2.98566	57	9.0899	[PATO:0000462^OBO_REL:towards(UBERON:CARO_0000013-CL_0000000-FBbt_00007002-FMA_68646-XAO_0003012-ZFA_0009000)]
ZFIN:ZDB-GENE-070809-2	doy	137	0.0146887	182	0.0520694	150	2.62797	83	7.82687	[PATO:0000587^inheres_in_part_of(UBERON:FMA_12513-MIAA_0000283-XAO_0000181)]
ZFIN:ZDB-GENE-000511-1	hand2	138	0.0146787	95	0.0627041	156	2.62363	125	6.88827	[PATO:0001507]
ZFIN:ZDB-GENE-001019-1	robo2	139	0.0146514	149	0.054036	116	2.79176	12	11.7338	[GO:0008037, GO:0008038]
ZFIN:ZDB-GENE-040513-7	cdh23	140	0.0146231	112	0.0581867	141	2.66885	125	6.88827	[PATO:0001507]
ZFIN:ZDB-GENE-020419-29	scarb2	141	0.0146156	191	0.0516779	83	2.97474	180	5.88827	[ZFA:0000112]
ZFIN:ZDB-GENE-070117-2460	wsh	142	0.0145127	199	0.0514051	78	3.0063	100	7.3762	[PATO:0000468^OBO_REL:has_qualifier(PATO:0000460)^OBO_REL:inheres_in(GO:0050881)]
ZFIN:ZDB-GENE-040426-1960	atp6ap2	143	0.0144655	133	0.0556309	127	2.73361	180	5.88827	[ZFA:0000112]
ZFIN:ZDB-GENE-070613-1	plxna3	144	0.0143647	221	0.0500329	91	2.9133	122	7.00584	[PATO:0000051^OBO_REL:inheres_in(UBERON:CL_0000100-FBbt_00005123-FMA_83617-WBbt_0005409-ZFA_0009052)]
ZFIN:ZDB-GENE-040907-1	rfc5	145	0.014357	167	0.052888	234	2.35662	88	7.54393	[PATO:0000001^inheres_in_part_of(UBERON:FMA_45615-MA_0000917-ZFA_0000112)]
ZFIN:ZDB-GENE-030109-1	ruvbl2	146	0.0143261	144	0.0543478	142	2.66779	180	5.88827	[ZFA:0000112]
ZFIN:ZDB-GENE-070117-253	unm tk259	147	0.0143005	124	0.0566038	148	2.63528	100	7.3762	[PATO:0000468^OBO_REL:has_qualifier(PATO:0000460)^OBO_REL:inheres_in(GO:0050881)]
ZFIN:ZDB-GENE-030131-2193	prdm1a	148	0.0142363	179	0.0522918	96	2.89731	152	6.64629	[PATO:0000646]
ZFIN:ZDB-GENE-070117-280	zar	149	0.0141947	159	0.053455	139	2.67812	150	6.68936	[UBERON:0000004]
ZFIN:ZDB-GENE-070117-71	cnc	150	0.0140812	164	0.0532135	235	2.34461	88	7.54393	[PATO:0000001^inheres_in_part_of(UBERON:FMA_45615-MA_0000917-ZFA_0000112)]
ZFIN:ZDB-GENE-040718-259	atp6v1f	151	0.0140314	142	0.0544588	149	2.62956	180	5.88827	[ZFA:0000112]
ZFIN:ZDB-GENE-070117-2434	tdo	152	0.0140276	145	0.0543329	160	2.60952	144	6.70033	[PATO:0000049]
ZFIN:ZDB-GENE-070427-5	gpa	153	0.0139955	166	0.0531335	162	2.60018	218	5.83289	[GO:0007423, GO:0048880]
ZFIN:ZDB-GENE-070117-2338	sla	154	0.0139891	134	0.0555928	176	2.58373	100	7.3762	[PATO:0000468^OBO_REL:has_qualifier(PATO:0000460)^OBO_REL:inheres_in(GO:0050881)]
ZFIN:ZDB-GENE-030131-9837	rrp1	155	0.013976	139	0.054878	153	2.62495	180	5.88827	[ZFA:0000112]
ZFIN:ZDB-GENE-070427-7	nco	156	0.0139748	218	0.0502376	146	2.64636	160	6.17917	[absent_slim]
ZFIN:ZDB-GENE-040426-1287	bysl	157	0.0139427	140	0.0546928	153	2.62495	180	5.88827	[ZFA:0000112]
ZFIN:ZDB-GENE-051108-1	hmgcrb	158	0.0139261	168	0.0528721	93	2.91023	143	6.87578	[PATO:0001999^OBO_REL:towards(GO:0003008), PATO:0001999^OBO_REL:towards(GO:0032501)]
ZFIN:ZDB-GENE-041007-3	twistnb	159	0.0139089	158	0.0535347	172	2.59056	180	5.88827	[ZFA:0000112]
ZFIN:ZDB-GENE-070306-7	unm b984	160	0.0138691	246	0.0487805	128	2.7268	156	6.59421	[UBERON:FMA_9905-MA_0000219-ZFA_0001574]
ZFIN:ZDB-GENE-050913-1	cwf19l2	161	0.0138627	165	0.053206	145	2.65652	180	5.88827	[ZFA:0000112]
ZFIN:ZDB-GENE-070117-501	unm tm130e	162	0.0138608	138	0.0548862	209	2.46807	231	5.48109	[UBERON:FBbt_00004199-FMA_58241-MA_0000275-MIAA_0000141-XAO_0000008-ZFA_0000035]
ZFIN:ZDB-GENE-080212-3	gly	163	0.0137925	199	0.0514051	143	2.66711	125	6.88827	[PATO:0001507]
ZFIN:ZDB-GENE-040426-811	rpsa	164	0.0137828	150	0.0540356	180	2.55572	180	5.88827	[ZFA:0000112]
ZFIN:ZDB-GENE-030131-8064	nkapl	165	0.0137828	151	0.0540356	180	2.55572	180	5.88827	[ZFA:0000112]
ZFIN:ZDB-GENE-030131-6378	heatr1	166	0.0137828	152	0.0540356	180	2.55572	180	5.88827	[ZFA:0000112]
ZFIN:ZDB-GENE-040426-764	nol10	167	0.0137699	143	0.0544218	159	2.61009	180	5.88827	[ZFA:0000112]
ZFIN:ZDB-GENE-990714-24	tcp1	168	0.0137445	160	0.0534247	197	2.50796	221	5.539	[PATO:0000406]
ZFIN:ZDB-GENE-030113-2	ttna	169	0.0137138	136	0.0553767	75	3.03652	80	7.9264	[PATO:0001624]
ZFIN:ZDB-GENE-040704-44	fam32al	170	0.0136871	111	0.0583224	224	2.40757	180	5.88827	[ZFA:0000112]
ZFIN:ZDB-GENE-070117-2492	brk	171	0.0136743	181	0.0522388	157	2.62172	164	6.05428	[PATO:0001241^OBO_REL:inheres_in(UBERON:CL_0000148-FMA_70545-XAO_0001014-ZFA_0009091)]
ZFIN:ZDB-GENE-070117-559	unm tm97d	172	0.0136738	194	0.0515395	163	2.59776	164	6.05428	[PATO:0001241^OBO_REL:inheres_in(UBERON:CL_0000148-FMA_70545-XAO_0001014-ZFA_0009091)]
ZFIN:ZDB-GENE-990415-75	flh	173	0.0136525	130	0.0561514	138	2.68176	125	6.88827	[PATO:0001507]
ZFIN:ZDB-GENE-030131-6986	ncl	174	0.0136208	156	0.0536451	199	2.49695	180	5.88827	[ZFA:0000112]
ZFIN:ZDB-GENE-990415-180	nar	175	0.0135932	153	0.0539084	164	2.59727	180	5.88827	[ZFA:0000112]
ZFIN:ZDB-GENE-020419-27	mcm7	176	0.0135901	183	0.0520192	144	2.666	180	5.88827	[ZFA:0000112]
ZFIN:ZDB-GENE-070117-2292	que	177	0.0135735	155	0.0536685	185	2.54911	100	7.3762	[PATO:0000468^OBO_REL:has_qualifier(PATO:0000460)^OBO_REL:inheres_in(GO:0050881)]
ZFIN:ZDB-GENE-070117-2107	ham	178	0.0134825	241	0.0489604	70	3.07522	100	7.3762	[PATO:0000468^OBO_REL:has_qualifier(PATO:0000460)^OBO_REL:inheres_in(GO:0050881)]
ZFIN:ZDB-GENE-040426-2701	rps11	179	0.0134801	173	0.0524881	169	2.59248	180	5.88827	[ZFA:0000112]
ZFIN:ZDB-GENE-030131-8093	utp11l	179	0.0134801	173	0.0524881	169	2.59248	180	5.88827	[ZFA:0000112]
ZFIN:ZDB-GENE-030131-5297	rpl12	179	0.0134801	173	0.0524881	169	2.59248	180	5.88827	[ZFA:0000112]
ZFIN:ZDB-GENE-070117-342	unm tg415	182	0.0134368	157	0.0535957	184	2.5498	100	7.3762	[PATO:0000468^OBO_REL:has_qualifier(PATO:0000460)^OBO_REL:inheres_in(GO:0050881)]
ZFIN:ZDB-GENE-040426-2833	stxbp3	183	0.0134311	170	0.0527036	186	2.53521	180	5.88827	[ZFA:0000112]
ZFIN:ZDB-GENE-070117-2187	mao(l)	184	0.0134283	148	0.0540541	166	2.59518	164	6.05428	[PATO:0001241^OBO_REL:inheres_in(UBERON:CL_0000148-FMA_70545-XAO_0001014-ZFA_0009091)]
ZFIN:ZDB-GENE-070117-2263	pup	185	0.0134222	238	0.0489796	79	3.00498	100	7.3762	[PATO:0000468^OBO_REL:has_qualifier(PATO:0000460)^OBO_REL:inheres_in(GO:0050881)]
ZFIN:ZDB-GENE-070117-492	unm tx239	186	0.01341	146	0.0542741	202	2.49332	100	7.3762	[PATO:0000468^OBO_REL:has_qualifier(PATO:0000460)^OBO_REL:inheres_in(GO:0050881)]
ZFIN:ZDB-GENE-070117-2373	sof	187	0.0134065	161	0.0533784	183	2.5552	100	7.3762	[PATO:0000468^OBO_REL:has_qualifier(PATO:0000460)^OBO_REL:inheres_in(GO:0050881)]
ZFIN:ZDB-GENE-040929-1	loc157570	188	0.0133997	178	0.0523056	195	2.51944	180	5.88827	[ZFA:0000112]
ZFIN:ZDB-GENE-040728-1	mgc45866l	189	0.013364	211	0.0507893	151	2.62646	180	5.88827	[ZFA:0000112]
ZFIN:ZDB-GENE-040715-8	nup205	189	0.013364	212	0.0507893	151	2.62646	180	5.88827	[ZFA:0000112]
ZFIN:ZDB-GENE-000526-1	hey2	191	0.013306	177	0.0524096	114	2.79821	87	7.58401	[PATO:0000608]
ZFIN:ZDB-GENE-990415-92	hspa8	192	0.0132521	195	0.0514403	192	2.51953	180	5.88827	[ZFA:0000112]
ZFIN:ZDB-GENE-040426-1936	fbl	192	0.0132521	195	0.0514403	192	2.51953	180	5.88827	[ZFA:0000112]
ZFIN:ZDB-GENE-030131-9685	ddx18	192	0.0132521	195	0.0514403	192	2.51953	180	5.88827	[ZFA:0000112]
ZFIN:ZDB-GENE-030131-1723	flj12716l	195	0.0132508	180	0.0522743	173	2.5874	180	5.88827	[ZFA:0000112]
ZFIN:ZDB-GENE-070117-607	unm tu46	196	0.0132241	219	0.0502008	134	2.69946	144	6.70033	[PATO:0000049]
ZFIN:ZDB-GENE-070117-2017	dfd	197	0.0132107	207	0.0510899	168	2.59426	164	6.05428	[PATO:0001241^OBO_REL:inheres_in(UBERON:CL_0000148-FMA_70545-XAO_0001014-ZFA_0009091)]
ZFIN:ZDB-GENE-040930-10	rpl28l	198	0.0132046	184	0.0519391	214	2.44138	180	5.88827	[ZFA:0000112]
ZFIN:ZDB-GENE-030131-6435	synbl	199	0.0131798	206	0.0511247	198	2.50489	164	6.05428	[PATO:0001241^OBO_REL:inheres_in(UBERON:CL_0000148-FMA_70545-XAO_0001014-ZFA_0009091)]
ZFIN:ZDB-GENE-030616-5	wdr75	200	0.0131701	203	0.0512465	215	2.44023	180	5.88827	[ZFA:0000112]
ZFIN:ZDB-GENE-070117-2210	miz	201	0.013146	192	0.0515818	205	2.48569	232	5.06487	[PATO:0000001^OBO_REL:inheres_in(UBERON:CL_0000147-MIAA_0000159-XAO_0003014-ZFA_0009090), UBERON:CL_0000147-MIAA_0000159-XAO_0003014-ZFA_0009090]
ZFIN:ZDB-GENE-050522-147	atp5o	202	0.0131255	193	0.0515464	188	2.52933	180	5.88827	[ZFA:0000112]
ZFIN:ZDB-GENE-020426-1	kif11	203	0.0129859	230	0.049621	200	2.4955	221	5.539	[PATO:0000406]
ZFIN:ZDB-GENE-070117-2344	sml	204	0.0129805	232	0.0495979	190	2.52344	164	6.05428	[PATO:0001241^OBO_REL:inheres_in(UBERON:CL_0000148-FMA_70545-XAO_0001014-ZFA_0009091)]
ZFIN:ZDB-GENE-070117-274	unm tu238	205	0.0128808	188	0.0518417	206	2.48124	100	7.3762	[PATO:0000468^OBO_REL:has_qualifier(PATO:0000460)^OBO_REL:inheres_in(GO:0050881)]
ZFIN:ZDB-GENE-030131-3445	dicer1	206	0.012876	113	0.0579809	207	2.47946	98	7.5243	[UBERON:FMA_45661-MA_0000442]
ZFIN:ZDB-GENE-021031-4	plod3	207	0.012871	190	0.0517585	203	2.49299	241	4.77086	[PATO:0000639]
ZFIN:ZDB-GENE-990603-9	smad5	208	0.0128695	171	0.0525657	124	2.76486	37	9.82687	[PATO:0001508]
ZFIN:ZDB-GENE-070117-331	unm to2a	209	0.0127997	224	0.0498316	187	2.53192	164	6.05428	[PATO:0001241^OBO_REL:inheres_in(UBERON:CL_0000148-FMA_70545-XAO_0001014-ZFA_0009091)]
ZFIN:ZDB-GENE-070117-2172	lte	210	0.0127543	222	0.0498975	158	2.62131	164	6.05428	[PATO:0001241^OBO_REL:inheres_in(UBERON:CL_0000148-FMA_70545-XAO_0001014-ZFA_0009091)]
ZFIN:ZDB-GENE-070117-2268	pic	211	0.0127404	154	0.0539084	225	2.40503	226	5.49535	[GO:0022008]
ZFIN:ZDB-GENE-070117-2422	tnt	212	0.0127243	161	0.0533784	236	2.34449	241	4.77086	[PATO:0000639]
ZFIN:ZDB-GENE-070117-2497	bru	213	0.0126727	208	0.0510345	126	2.7397	100	7.3762	[PATO:0000468^OBO_REL:has_qualifier(PATO:0000460)^OBO_REL:inheres_in(GO:0050881)]
ZFIN:ZDB-GENE-030131-3238	pabpc1a	214	0.0126674	216	0.0503448	227	2.40095	232	5.06487	[PATO:0000001^OBO_REL:inheres_in(UBERON:CL_0000147-MIAA_0000159-XAO_0003014-ZFA_0009090), UBERON:CL_0000147-MIAA_0000159-XAO_0003014-ZFA_0009090]
ZFIN:ZDB-GENE-070117-2491	brd	215	0.0125816	187	0.0518519	189	2.52492	175	5.91998	[UBERON:FMA_79876-MA_0000169]
ZFIN:ZDB-GENE-990415-206	pes	216	0.0125496	217	0.0503101	201	2.49394	180	5.88827	[ZFA:0000112]
ZFIN:ZDB-GENE-030114-9	pola1	217	0.012513	213	0.0507197	221	2.41869	221	5.539	[PATO:0000406]
ZFIN:ZDB-GENE-990603-6	prim1	218	0.0124834	126	0.0564409	218	2.43408	175	5.91998	[UBERON:FMA_79876-MA_0000169]
ZFIN:ZDB-GENE-070117-2297	rdy	219	0.0124249	220	0.0500677	211	2.45381	175	5.91998	[UBERON:FMA_79876-MA_0000169]
ZFIN:ZDB-GENE-051220-1	lhx2	220	0.0123923	228	0.0497275	204	2.49255	226	5.49535	[GO:0022008]
ZFIN:ZDB-GENE-040801-106	glrbb	221	0.0123856	204	0.0512129	231	2.36723	241	4.77086	[PATO:0000639]
ZFIN:ZDB-GENE-070117-2358	skm	222	0.0122974	185	0.0519218	242	2.30249	240	4.77375	[UBERON:FMA_60909-MA_0000237-MIAA_0000145-XAO_0000192-ZFA_0000217]
ZFIN:ZDB-GENE-070117-2029	dul	223	0.0122565	189	0.0517821	239	2.30715	248	4.58147	[ZFA:0001490]
ZFIN:ZDB-GENE-070117-215	unm tl17a	224	0.0122456	235	0.0491803	222	2.41361	164	6.05428	[PATO:0001241^OBO_REL:inheres_in(UBERON:CL_0000148-FMA_70545-XAO_0001014-ZFA_0009091)]
ZFIN:ZDB-GENE-070117-290	unm ts40	225	0.0122261	248	0.0486635	223	2.41323	175	5.91998	[UBERON:FMA_79876-MA_0000169]
ZFIN:ZDB-GENE-030131-2085	rpl14	226	0.0121755	210	0.0508591	246	2.26815	247	4.7394	[UBERON:FMA_87657-MIAA_0000176-XAO_0000042-ZFA_0001120]
ZFIN:ZDB-GENE-070117-210	unm th242b	227	0.0121429	234	0.049291	220	2.42682	164	6.05428	[PATO:0001241^OBO_REL:inheres_in(UBERON:CL_0000148-FMA_70545-XAO_0001014-ZFA_0009091)]
ZFIN:ZDB-GENE-070117-237	unm m756	228	0.0120716	226	0.0498294	237	2.33355	232	5.06487	[PATO:0000001^OBO_REL:inheres_in(UBERON:CL_0000147-MIAA_0000159-XAO_0003014-ZFA_0009090), UBERON:CL_0000147-MIAA_0000159-XAO_0003014-ZFA_0009090]
ZFIN:ZDB-GENE-070117-2177	log	229	0.0120657	205	0.0511327	232	2.35896	158	6.24994	[UBERON:CL_0000076-ZFA_0009039]
ZFIN:ZDB-GENE-070117-724	ddl	230	0.0119364	209	0.0509511	243	2.29806	226	5.49535	[GO:0022008]
ZFIN:ZDB-GENE-030421-3	plcg1	231	0.011921	230	0.049621	226	2.40202	221	5.539	[PATO:0000406]
ZFIN:ZDB-GENE-070117-2152	kon	232	0.0118858	242	0.048913	178	2.5734	100	7.3762	[PATO:0000468^OBO_REL:has_qualifier(PATO:0000460)^OBO_REL:inheres_in(GO:0050881)]
ZFIN:ZDB-GENE-070117-2335	sch	233	0.011834	225	0.0498294	217	2.43557	100	7.3762	[PATO:0000468^OBO_REL:has_qualifier(PATO:0000460)^OBO_REL:inheres_in(GO:0050881)]
ZFIN:ZDB-GENE-001207-3	arnt2	234	0.0118269	223	0.0498596	219	2.433	100	7.3762	[PATO:0000468^OBO_REL:has_qualifier(PATO:0000460)^OBO_REL:inheres_in(GO:0050881)]
ZFIN:ZDB-GENE-070117-2321	bil	235	0.0118192	245	0.0488136	229	2.38115	232	5.06487	[PATO:0000001^OBO_REL:inheres_in(UBERON:CL_0000147-MIAA_0000159-XAO_0003014-ZFA_0009090), UBERON:CL_0000147-MIAA_0000159-XAO_0003014-ZFA_0009090]
ZFIN:ZDB-GENE-041007-1	mybl2	236	0.0118013	198	0.0514139	216	2.43582	125	6.88827	[PATO:0001507]
ZFIN:ZDB-GENE-030131-574	ift88	237	0.0117999	215	0.0504371	230	2.37357	125	6.88827	[PATO:0001507]
ZFIN:ZDB-GENE-030131-5566	kiaa0947l	238	0.0117841	228	0.0497275	212	2.45086	180	5.88827	[ZFA:0000112]
ZFIN:ZDB-GENE-070117-2046	exp	239	0.0117063	227	0.0497312	245	2.26864	241	4.77086	[PATO:0000639]
ZFIN:ZDB-GENE-040426-1333	surf6l	240	0.0116931	250	0.0486301	213	2.44951	180	5.88827	[ZFA:0000112]
ZFIN:ZDB-GENE-070117-2207	mlk	241	0.0116775	249	0.0486486	228	2.38986	232	5.06487	[PATO:0000001^OBO_REL:inheres_in(UBERON:CL_0000147-MIAA_0000159-XAO_0003014-ZFA_0009090), UBERON:CL_0000147-MIAA_0000159-XAO_0003014-ZFA_0009090]
ZFIN:ZDB-GENE-070117-2184	luc	242	0.0116722	236	0.0491694	241	2.30637	241	4.77086	[PATO:0000639]
ZFIN:ZDB-GENE-070117-225	unm tf212	243	0.0115442	247	0.0487145	240	2.30663	241	4.77086	[PATO:0000639]
ZFIN:ZDB-GENE-070117-1565	dri	244	0.0113574	239	0.0489655	248	2.23575	248	4.58147	[ZFA:0001490]
ZFIN:ZDB-GENE-030616-450	epb41l5	245	0.0113157	172	0.0525597	249	2.17563	180	5.88827	[ZFA:0000112]
ZFIN:ZDB-GENE-020905-2	copa	246	0.0110844	233	0.0495704	250	2.16141	248	4.58147	[ZFA:0001490]
ZFIN:ZDB-GENE-040426-1076	eif3g	247	0.0110378	239	0.0489655	244	2.28654	232	5.06487	[PATO:0000001^OBO_REL:inheres_in(UBERON:CL_0000147-MIAA_0000159-XAO_0003014-ZFA_0009090), UBERON:CL_0000147-MIAA_0000159-XAO_0003014-ZFA_0009090]
ZFIN:ZDB-GENE-070117-2440	twn	248	0.0110369	243	0.0488981	238	2.32351	232	5.06487	[PATO:0000001^OBO_REL:inheres_in(UBERON:CL_0000147-MIAA_0000159-XAO_0003014-ZFA_0009090), UBERON:CL_0000147-MIAA_0000159-XAO_0003014-ZFA_0009090]
ZFIN:ZDB-GENE-070117-2015	dgn	249	0.010972	243	0.0488981	233	2.35703	232	5.06487	[PATO:0000001^OBO_REL:inheres_in(UBERON:CL_0000147-MIAA_0000159-XAO_0003014-ZFA_0009090), UBERON:CL_0000147-MIAA_0000159-XAO_0003014-ZFA_0009090]
ZFIN:ZDB-GENE-980526-253	mef2ca	250	0.0103776	237	0.0490517	247	2.24911	175	5.91998	[GO:0044444]
