# Supplementary material for: Linking Human Diseases to Animal Models Using Ontology-Based Phenotype Annotation
Source: PLoS Biol. 2009 Nov 24;7(11):e1000247. doi: 10.1371/journal.pbio.1000247 (PMC2774506; doi:10.1371/journal.pbio.1000247)
Supplement: Table S10 — Comparison between human SOX9 and zebrafish genes. The top 250 genes (by simJ) are reported, together with the rank and score for each metric (simIC, simJ, avgICCS, and maxIC). Additionally, the maxIC phenotype is reported using ontology identifiers. See Materials and Methods for a list of ontology prefixes. Known sequence orthologs are highlighted in yellow and listed in Table 6, if present. Genes at rank 1 are listed in Table 7. (0.09 MB XLS) [file pbio.1000247.s010.xls]

## Sheet: NCBI_Gene_6662-vs-allg-allscore
zfin gene id	zfin gene name	simIC rank	simIC	simJ rank	simJ	avgICCS rank	avgICCS	maxIC rank	maxIC	maxIC phenotype
ZFIN:ZDB-GENE-990415-72	fgf8a	1	0.0297796	2	0.0852754	1	4.26945	2	12.1488	[PATO:0001324]
ZFIN:ZDB-GENE-990415-171	cdh2	2	0.0277204	6	0.0803023	6	3.75153	62	9.41183	[PATO:0000407]
ZFIN:ZDB-GENE-060718-1	rerea	3	0.0273419	5	0.0811241	3	4.07361	20	11.1488	[PATO:0000646^inheres_in_part_of(UBERON:FBbt_00005055-FMA_7152-MA_0000323-MIAA_0000018-WBbt_0005748-XAO_0000125-ZFA_0000339), PATO:0001617^OBO_REL:inheres_in(UBERON:FMA_23875-FMA_23881-MA_0000018-MIAA_0000032-XAO_0003060-ZFA_0000434)]
ZFIN:ZDB-GENE-990712-18	eya1	4	0.0270551	4	0.0823715	5	3.78622	20	11.1488	[PATO:0000411^inheres_in_part_of(UBERON:FBbt_00000004-FBbt_00003007-FMA_46565-FMA_7154-FMA_87596-MA_0000023-MA_0000316-MIAA_0000017-MIAA_0000149-MIAA_0000294-MIAA_0000340-WBbt_0005739-XAO_0003024-ZFA_0000737-ZFA_0001114)]
ZFIN:ZDB-GENE-980526-143	foxd3	5	0.0262668	17	0.0737986	4	3.87114	20	11.1488	[PATO:0000051^OBO_REL:inheres_in(UBERON:FMA_76621-XAO_0003059-ZFA_0001424), PATO:0001617^OBO_REL:inheres_in(UBERON:FMA_23875-FMA_23881-MA_0000018-MIAA_0000032-XAO_0003060-ZFA_0000434)]
ZFIN:ZDB-GENE-051113-132	cdc16	6	0.0260623	1	0.0854907	38	3.12431	20	11.1488	[PATO:0001999^OBO_REL:towards(GO:0032502)]
ZFIN:ZDB-GENE-001103-1	sox9a	7	0.0254274	8	0.0790722	2	4.08354	2	12.1488	[PATO:0000462^inheres_in_part_of(UBERON:FMA_6200-FMA_62000-MA_0000183-MIAA_0000421-XAO_0000012-ZFA_0000079)]
ZFIN:ZDB-GENE-020507-3	vangl2	8	0.025272	12	0.0768008	10	3.53409	66	9.27433	[PATO:0000936]
ZFIN:ZDB-GENE-020419-32	hdac1	9	0.0252102	3	0.0838135	9	3.58449	54	9.64629	[PATO:0001905]
ZFIN:ZDB-GENE-030404-2	mib	10	0.0234549	7	0.0800791	28	3.23504	30	10.5638	[PATO:0000001^OBO_REL:towards(UBERON:FMA_50720-MA_0000061-MA_0000064-MIAA_0000034-XAO_0000114-ZFA_0000005)]
ZFIN:ZDB-GENE-011119-1	kny	11	0.0232781	14	0.0746432	21	3.33874	80	8.21019	[PATO:0000600]
ZFIN:ZDB-GENE-980526-196	ptc2	12	0.0232431	31	0.0677656	42	3.09376	2	12.1488	[PATO:0001322, TO:0000262, TO:0000268]
ZFIN:ZDB-GENE-980526-44	ptc1	13	0.0231828	36	0.0673607	30	3.1934	2	12.1488	[PATO:0001322, TO:0000262, TO:0000268]
ZFIN:ZDB-GENE-070117-2066	flr	14	0.0228769	11	0.0772918	17	3.42131	12	11.7338	[PATO:0001673^OBO_REL:inheres_in(UBERON:FMA_15900-FMA_7203-MA_0000368-MA_0000380-MIAA_0000118-MIAA_0000119-MIAA_0000122-WBbt_0005775-XAO_0000154-ZFA_0000529)]
ZFIN:ZDB-GENE-031125-3	rbm19	15	0.0228492	13	0.0753709	13	3.44568	33	10.2743	[PATO:0000141^OBO_REL:inheres_in(UBERON:FMA_15900-FMA_7203-MA_0000368-MA_0000380-MIAA_0000118-MIAA_0000119-MIAA_0000122-WBbt_0005775-XAO_0000154-ZFA_0000529)]
ZFIN:ZDB-GENE-011212-6	tfap2a	16	0.0227876	26	0.06893	8	3.70684	2	12.1488	[PATO:0000462^inheres_in_part_of(UBERON:FMA_6200-FMA_62000-MA_0000183-MIAA_0000421-XAO_0000012-ZFA_0000079)]
ZFIN:ZDB-GENE-040822-18	cdc26	17	0.0225409	9	0.0785891	75	2.77133	114	7.60447	[PATO:0000587^inheres_in_part_of(UBERON:FBbt_00004508-FMA_54448-MA_0000261-MIAA_0000140-XAO_0000179-ZFA_0000107)]
ZFIN:ZDB-GENE-070117-512	grb	18	0.022171	23	0.0702281	25	3.26712	2	12.1488	[PATO:0001324]
ZFIN:ZDB-GENE-021226-1	lamb1	19	0.021435	16	0.0740306	11	3.46538	40	9.82687	[PATO:0000640, PATO:0001508]
ZFIN:ZDB-GENE-011105-1	prkci	20	0.0213581	10	0.0784077	50	3.03871	120	7.25802	[PATO:0001608]
ZFIN:ZDB-GENE-030616-594	plcb3	21	0.0211712	27	0.0682927	7	3.74155	50	9.73376	[PATO:0001617^inheres_in_part_of(UBERON:FMA_23875-FMA_23881-MA_0000018-MIAA_0000032-XAO_0003060-ZFA_0000434)]
ZFIN:ZDB-GENE-021226-3	lamc1	22	0.020596	21	0.0715962	14	3.44212	40	9.82687	[PATO:0000640, PATO:0001508]
ZFIN:ZDB-GENE-080530-2	vps39	23	0.0205955	15	0.0740741	23	3.28414	39	10.0333	[PATO:0000937^inheres_in_part_of(UBERON:CARO_0000066-FBbt_00007005-FMA_9639-XAO_0003045-ZFA_0001486)]
ZFIN:ZDB-GENE-010906-1	ache	24	0.0204159	20	0.07173	37	3.13176	54	9.64629	[PATO:0001905]
ZFIN:ZDB-GENE-030318-2	chm	25	0.0203936	18	0.072401	26	3.23724	18	11.4118	[PATO:0000468^OBO_REL:inheres_in(GO:0007600)]
ZFIN:ZDB-GENE-990603-12	wnt11	26	0.0203811	24	0.0698864	12	3.44988	80	8.21019	[PATO:0000600]
ZFIN:ZDB-GENE-990415-8	pax2a	27	0.0199971	30	0.0680203	15	3.43482	2	12.1488	[PATO:0001999^OBO_REL:towards(GO:0048856)]
ZFIN:ZDB-GENE-070117-2175	lok	28	0.0199949	52	0.0625379	49	3.0397	33	10.2743	[PATO:0001673]
ZFIN:ZDB-GENE-011207-1	sox10	29	0.0196308	34	0.0674502	16	3.42234	12	11.7338	[PATO:0000462^OBO_REL:towards(UBERON:FBbt_00005093-FMA_7157-MA_0000016-MIAA_0000026-WBbt_0005735-XAO_0000177-ZFA_0000396), PATO:0001999^OBO_REL:towards(UBERON:FBbt_00005093-FMA_7157-MA_0000016-MIAA_0000026-WBbt_0005735-XAO_0000177-ZFA_0000396)]
ZFIN:ZDB-GENE-980526-166	shha	30	0.0188659	19	0.0718326	64	2.87301	128	6.88827	[PATO:0001507]
ZFIN:ZDB-GENE-020419-39	stil	31	0.018753	32	0.0677146	29	3.23184	54	9.64629	[PATO:0001905]
ZFIN:ZDB-GENE-980526-437	ntl	32	0.0185062	38	0.0663589	41	3.10416	54	9.64629	[PATO:0001905]
ZFIN:ZDB-GENE-990415-33	chd	33	0.0180817	44	0.0640809	34	3.17561	66	9.27433	[PATO:0000936]
ZFIN:ZDB-GENE-070117-632	shy	34	0.0180283	68	0.0565438	39	3.12054	33	10.2743	[PATO:0001673]
ZFIN:ZDB-GENE-980526-87	wnt5b	35	0.0180098	40	0.0654152	20	3.34504	80	8.21019	[PATO:0000600]
ZFIN:ZDB-GENE-980526-501	tal1	36	0.0180018	28	0.0681024	27	3.23582	30	10.5638	[PATO:0000001^OBO_REL:towards(UBERON:FMA_50720-MA_0000061-MA_0000064-MIAA_0000034-XAO_0000114-ZFA_0000005)]
ZFIN:ZDB-GENE-070117-280	zar	37	0.0179927	73	0.0561583	36	3.14275	33	10.2743	[PATO:0001673]
ZFIN:ZDB-GENE-060118-1	lama1	38	0.0178552	22	0.0708801	84	2.72666	149	6.43914	[UBERON:FMA_76621-XAO_0003059-ZFA_0001424]
ZFIN:ZDB-GENE-070117-2327	ruz	39	0.0177802	35	0.0674293	68	2.79376	122	7.1044	[MP:0003111, PATO:0000051^OBO_REL:inheres_in(GO:0005634)]
ZFIN:ZDB-GENE-030131-994	rad21	40	0.0177313	33	0.0676329	96	2.65994	122	7.1044	[MP:0003111, PATO:0000051^OBO_REL:inheres_in(GO:0005634)]
ZFIN:ZDB-GENE-980526-330	cdx4	41	0.0176872	46	0.0635903	40	3.11353	33	10.2743	[PATO:0001673]
ZFIN:ZDB-GENE-000201-18	pbx4	42	0.0176303	25	0.0698782	58	2.92019	146	6.64629	[PATO:0000646]
ZFIN:ZDB-GENE-980526-89	smo	43	0.0173177	29	0.0680571	54	2.97735	128	6.88827	[PATO:0001507]
ZFIN:ZDB-GENE-030131-3827	eif3ea	44	0.0172281	56	0.0610063	22	3.28528	12	11.7338	[PATO:0000646^inheres_in_part_of(UBERON:FBbt_00003126-FMA_20292-FMA_46490-FMA_49184-MA_0000341-MA_0002474-MIAA_0000038-WBbt_0005255-XAO_0000126-XAO_0003029-ZFA_0000547-ZFA_0000590-ZFA_0001027)]
ZFIN:ZDB-GENE-040704-44	fam32al	45	0.0169673	39	0.0657216	59	2.90254	84	8.11905	[PATO:0000001^OBO_REL:inheres_in(UBERON:FMA_54398-MA_0001906-XAO_0003084-ZFA_0001273)]
ZFIN:ZDB-GENE-040426-2169	spint1a	46	0.0168809	42	0.0644803	43	3.0886	118	7.5243	[UBERON:FMA_45661-MA_0000442]
ZFIN:ZDB-GENE-990415-181	ndr2	47	0.0168463	50	0.062759	53	3.01457	54	9.64629	[PATO:0001905]
ZFIN:ZDB-GENE-040426-1146	traf3ip1	48	0.0167456	47	0.0634615	45	3.04861	12	11.7338	[PATO:0001673^OBO_REL:inheres_in(UBERON:FMA_15900-FMA_7203-MA_0000368-MA_0000380-MIAA_0000118-MIAA_0000119-MIAA_0000122-WBbt_0005775-XAO_0000154-ZFA_0000529)]
ZFIN:ZDB-GENE-070423-1	gfpt1	49	0.0165083	61	0.0601408	76	2.76858	66	9.27433	[PATO:0000587^OBO_REL:inheres_in(UBERON:FMA_54398-MA_0001906-XAO_0003084-ZFA_0001273), PATO:0000645^OBO_REL:inheres_in(UBERON:FMA_54398-MA_0001906-XAO_0003084-ZFA_0001273)]
ZFIN:ZDB-GENE-040426-2784	sass6	50	0.0164662	53	0.0623457	94	2.68877	74	8.77956	[MP:0003706, PATO:0000070^OBO_REL:inheres_in(GO:0005634)]
ZFIN:ZDB-GENE-990415-198	oep	51	0.0164601	49	0.063058	46	3.04829	54	9.64629	[PATO:0001905]
ZFIN:ZDB-GENE-990706-8	gli2a	52	0.0163788	48	0.063104	52	3.03255	20	11.1488	[PATO:0000462^inheres_in_part_of(UBERON:FMA_61992-MA_0000170-MIAA_0000105-XAO_0000011-ZFA_0000109)]
ZFIN:ZDB-GENE-070117-2032	alb	53	0.0162149	41	0.0647131	67	2.83061	18	11.4118	[PATO:0001154]
ZFIN:ZDB-GENE-040724-10	sart3	54	0.0162018	57	0.0609385	55	2.96345	61	9.48583	[GO:0010467]
ZFIN:ZDB-GENE-980526-485	pou5f1	55	0.0161123	54	0.0619104	35	3.14861	50	9.73376	[PATO:0001617^inheres_in_part_of(UBERON:FMA_23875-FMA_23881-MA_0000018-MIAA_0000032-XAO_0003060-ZFA_0000434)]
ZFIN:ZDB-GENE-070117-2515	clo	56	0.0160435	62	0.0599161	47	3.04726	80	8.21019	[PATO:0000600]
ZFIN:ZDB-GENE-041212-49	arhgef7b	57	0.0159917	64	0.0586124	24	3.27211	2	12.1488	[PATO:0001505]
ZFIN:ZDB-GENE-030131-2887	polr3b	58	0.0159857	66	0.0583438	33	3.18459	12	11.7338	[GO:0044249]
ZFIN:ZDB-GENE-070514-1	dry	59	0.0158631	43	0.0641026	117	2.52172	122	7.1044	[MP:0003111, PATO:0000051^OBO_REL:inheres_in(GO:0005634)]
ZFIN:ZDB-GENE-040426-2452	sfpq	60	0.0156888	37	0.0665083	114	2.53611	99	7.77956	[PATO:0000617]
ZFIN:ZDB-GENE-030131-7949	supt6h	61	0.0155042	45	0.0639053	70	2.78391	40	9.82687	[PATO:0001508]
ZFIN:ZDB-GENE-040426-1947	chaf1b	62	0.0153784	60	0.0602817	65	2.86653	114	7.60447	[PATO:0000587^inheres_in_part_of(UBERON:FBbt_00004508-FMA_54448-MA_0000261-MIAA_0000140-XAO_0000179-ZFA_0000107)]
ZFIN:ZDB-GENE-020104-1	hnf1b	63	0.0151004	51	0.0625759	51	3.03494	94	8.03332	[PATO:0000411]
ZFIN:ZDB-GENE-990415-256	ndr1	64	0.0150835	80	0.0537507	44	3.05504	54	9.64629	[PATO:0001905]
ZFIN:ZDB-GENE-070426-2	mko	65	0.014885	67	0.0577725	72	2.77794	128	6.88827	[PATO:0001507]
ZFIN:ZDB-GENE-990415-22	dharma	66	0.0145723	77	0.0548204	56	2.9309	50	9.73376	[PATO:0001617^inheres_in_part_of(UBERON:FMA_23875-FMA_23881-MA_0000018-MIAA_0000032-XAO_0003060-ZFA_0000434)]
ZFIN:ZDB-GENE-980526-178	fgf3	67	0.0144067	59	0.0603136	80	2.75513	128	6.88827	[PATO:0001507]
ZFIN:ZDB-GENE-040526-1	dzip1	68	0.0143067	87	0.0521961	48	3.04622	20	11.1488	[PATO:0000462^inheres_in_part_of(UBERON:FMA_61992-MA_0000170-MIAA_0000105-XAO_0000011-ZFA_0000109)]
ZFIN:ZDB-GENE-990415-75	flh	69	0.0140811	78	0.054803	57	2.92226	50	9.73376	[PATO:0001617^inheres_in_part_of(UBERON:FMA_23875-FMA_23881-MA_0000018-MIAA_0000032-XAO_0003060-ZFA_0000434)]
ZFIN:ZDB-GENE-021115-2	trpm7	70	0.0140293	70	0.0564972	90	2.70653	12	11.7338	[GO:0044249]
ZFIN:ZDB-GENE-070117-2049	fad	71	0.0139704	71	0.0564904	106	2.60036	71	9.0899	[PATO:0000467]
ZFIN:ZDB-GENE-040426-1600	mlh1	72	0.0137639	99	0.0501792	69	2.79355	125	7.03332	[GO:0005634]
ZFIN:ZDB-GENE-020712-1	mpp5a	73	0.0136551	58	0.0606827	104	2.62326	90	8.06133	[PATO:0002014]
ZFIN:ZDB-GENE-030530-1	szl	74	0.0135144	81	0.0530256	92	2.69505	147	6.64629	[PATO:0000646]
ZFIN:ZDB-GENE-060503-416	slc17a8	75	0.0135143	72	0.0563204	88	2.71169	40	9.82687	[PATO:0001508]
ZFIN:ZDB-GENE-980526-464	kita	76	0.0134989	96	0.0505789	86	2.72441	145	6.86339	[PATO:0001602]
ZFIN:ZDB-GENE-041124-2	extl3	77	0.0133937	63	0.0590823	113	2.53699	84	8.11905	[PATO:0000001^OBO_REL:inheres_in(UBERON:FMA_54398-MA_0001906-XAO_0003084-ZFA_0001273)]
ZFIN:ZDB-GENE-030131-6458	musk	78	0.0133865	91	0.0512983	71	2.78204	79	8.41183	[GO:0019538, GO:0044267]
ZFIN:ZDB-GENE-040426-2039	uhrf1	79	0.013361	65	0.0584941	115	2.53461	120	7.25802	[PATO:0000141^inheres_in_part_of(UBERON:CARO_0000066-FBbt_00007005-FMA_9639-XAO_0003045-ZFA_0001486)]
ZFIN:ZDB-GENE-070117-2511	cho	80	0.0133032	105	0.0494474	62	2.8913	66	9.27433	[PATO:0000936]
ZFIN:ZDB-GENE-040624-5	ctcf	81	0.0132127	75	0.0557717	74	2.77315	99	7.77956	[PATO:0000617]
ZFIN:ZDB-GENE-041020-1	tll1	82	0.0129911	124	0.0462842	31	3.19012	2	12.1488	[PATO:0000617^inheres_in_part_of(UBERON:FMA_7181-MIAA_0000296-XAO_0003025-ZFA_0001115)]
ZFIN:ZDB-GENE-070427-4	pno	83	0.0129484	92	0.0510076	87	2.71935	73	8.9264	[PATO:0000965]
ZFIN:ZDB-GENE-040426-1664	pde6c	84	0.0127738	76	0.0553435	91	2.70401	40	9.82687	[PATO:0001508]
ZFIN:ZDB-GENE-060125-1	med12	85	0.0127622	69	0.0565438	152	2.36577	128	6.88827	[PATO:0001507]
ZFIN:ZDB-GENE-030131-6778	rtf1	86	0.0127269	55	0.0610831	119	2.51652	40	9.82687	[PATO:0001508]
ZFIN:ZDB-GENE-980526-474	bmp2b	87	0.0125888	101	0.0499376	66	2.84427	128	6.88827	[PATO:0001507]
ZFIN:ZDB-GENE-020905-1	atp2a1	88	0.012566	93	0.0510006	85	2.72616	99	7.77956	[PATO:0000617]
ZFIN:ZDB-GENE-070117-397	unm m358	89	0.0125468	157	0.0437052	19	3.34654	2	12.1488	[PATO:0000617^inheres_in_part_of(UBERON:FMA_7181-MIAA_0000296-XAO_0003025-ZFA_0001115)]
ZFIN:ZDB-GENE-030911-7	disp1	90	0.0125384	82	0.0528905	118	2.51825	149	6.43914	[UBERON:FMA_76621-XAO_0003059-ZFA_0001424]
ZFIN:ZDB-GENE-990415-9	acvr1	91	0.0124105	85	0.0523039	100	2.63993	40	9.82687	[PATO:0001508]
ZFIN:ZDB-GENE-020418-2	sec61al1	92	0.012379	88	0.0518807	89	2.70747	99	7.77956	[PATO:0000617]
ZFIN:ZDB-GENE-030131-2193	prdm1a	93	0.0123618	113	0.0477087	61	2.89229	66	9.27433	[PATO:0000936]
ZFIN:ZDB-GENE-030321-1	gli1	94	0.0121826	74	0.0558968	108	2.58691	128	6.88827	[PATO:0001507]
ZFIN:ZDB-GENE-020919-3	unc45b	95	0.0121018	84	0.0523077	110	2.55849	40	9.82687	[PATO:0001508]
ZFIN:ZDB-GENE-000526-1	hey2	96	0.0120868	89	0.0518257	120	2.50398	117	7.58401	[PATO:0000608]
ZFIN:ZDB-GENE-070117-1989	kiaa1279	97	0.01203	79	0.0542352	103	2.62534	90	8.06133	[PATO:0002014]
ZFIN:ZDB-GENE-070117-2313	bib	98	0.0118115	175	0.0425915	18	3.38142	62	9.41183	[PATO:0000407]
ZFIN:ZDB-GENE-070306-6	unm b953	99	0.0118039	209	0.0413386	32	3.18569	20	11.1488	[PATO:0001617^OBO_REL:inheres_in(UBERON:FMA_23875-FMA_23881-MA_0000018-MIAA_0000032-XAO_0003060-ZFA_0000434)]
ZFIN:ZDB-GENE-060825-45	atp7a	100	0.0117841	100	0.0501567	102	2.63254	128	6.88827	[PATO:0001507]
ZFIN:ZDB-GENE-070117-2177	log	101	0.0117029	103	0.0498737	124	2.49129	188	6.24994	[UBERON:CL_0000076-ZFA_0009039]
ZFIN:ZDB-GENE-050616-5	cx36.7	102	0.0116441	97	0.0505288	99	2.65162	90	8.06133	[PATO:0002014]
ZFIN:ZDB-GENE-000403-1	axin1	103	0.0114449	83	0.0526316	155	2.3553	128	6.88827	[PATO:0001507]
ZFIN:ZDB-GENE-001212-1	atp1a1	104	0.0113504	86	0.0522581	160	2.31321	192	5.539	[PATO:0000406]
ZFIN:ZDB-GENE-051108-1	hmgcrb	105	0.0113451	110	0.0482234	63	2.88443	98	7.85111	[PATO:0001631]
ZFIN:ZDB-GENE-030131-6223	sufu	106	0.0113196	102	0.0499368	73	2.77759	95	7.9264	[PATO:0002006]
ZFIN:ZDB-GENE-070117-2358	skm	107	0.0112017	107	0.0492126	170	2.26707	149	6.43914	[UBERON:FMA_76621-XAO_0003059-ZFA_0001424]
ZFIN:ZDB-GENE-020419-29	scarb2	108	0.0110656	152	0.0442133	83	2.72753	99	7.77956	[PATO:0000617]
ZFIN:ZDB-GENE-070427-3	kmi	109	0.0109489	104	0.0498737	159	2.31624	189	6.17917	[absent_slim]
ZFIN:ZDB-GENE-070117-2111	hen	110	0.0109349	138	0.0453368	101	2.63475	84	8.11905	[PATO:0000001^OBO_REL:inheres_in(UBERON:FMA_54398-MA_0001906-XAO_0003084-ZFA_0001273)]
ZFIN:ZDB-GENE-070117-2413	sri(l)	111	0.0109015	106	0.049359	81	2.7444	95	7.9264	[PATO:0002006]
ZFIN:ZDB-GENE-990603-9	smad5	112	0.0108539	119	0.046837	60	2.89916	40	9.82687	[PATO:0001508]
ZFIN:ZDB-GENE-070117-1563	dhv	113	0.0108502	94	0.0508143	116	2.52194	99	7.77956	[PATO:0000617]
ZFIN:ZDB-GENE-030326-1	dlst	114	0.0108422	133	0.0456376	121	2.50169	84	8.11905	[PATO:0000001^OBO_REL:inheres_in(UBERON:FMA_54398-MA_0001906-XAO_0003084-ZFA_0001273)]
ZFIN:ZDB-GENE-070117-2462	wat	115	0.0107752	161	0.0434211	78	2.75663	75	8.73376	[PATO:0000406^inheres_in_part_of(UBERON:FMA_7181-MIAA_0000296-XAO_0003025-ZFA_0001115)]
ZFIN:ZDB-GENE-070117-2482	ziz	116	0.0107579	164	0.0432787	79	2.75663	75	8.73376	[PATO:0000406^inheres_in_part_of(UBERON:FMA_7181-MIAA_0000296-XAO_0003025-ZFA_0001115)]
ZFIN:ZDB-GENE-000511-1	hand2	117	0.0107084	90	0.0517677	134	2.46747	128	6.88827	[PATO:0001507]
ZFIN:ZDB-GENE-070117-580	unm tu202	118	0.0106527	146	0.0445902	107	2.59636	190	5.88201	[PATO:0000001^OBO_REL:inheres_in(UBERON:FMA_54396-MA_0001905-ZFA_0001227)]
ZFIN:ZDB-GENE-030109-1	ruvbl2	119	0.0106395	120	0.0467105	122	2.49789	99	7.77956	[PATO:0000617]
ZFIN:ZDB-GENE-070426-3	alo	120	0.0105597	111	0.0482154	129	2.47529	187	6.42998	[PATO:0000937]
ZFIN:ZDB-GENE-030113-2	ttna	121	0.010544	112	0.0480949	109	2.57957	95	7.9264	[PATO:0001624]
ZFIN:ZDB-GENE-080317-5	int	122	0.0105327	198	0.0418301	97	2.65622	1	12.7338	[PATO:0000462^inheres_in_part_of(UBERON:FMA_69050-XAO_0001010-ZFA_0001079)]
ZFIN:ZDB-GENE-990714-24	tcp1	123	0.0104757	131	0.045756	126	2.4866	99	7.77956	[PATO:0000617]
ZFIN:ZDB-GENE-030715-1	fgf10a	124	0.0104689	179	0.0424437	77	2.7684	33	10.2743	[PATO:0000599]
ZFIN:ZDB-GENE-070117-521	unm ti205	125	0.0104446	129	0.045925	161	2.30628	149	6.43914	[UBERON:FMA_76621-XAO_0003059-ZFA_0001424]
ZFIN:ZDB-GENE-990415-238	rx3	126	0.0104228	128	0.045925	176	2.25282	128	6.88827	[PATO:0001507]
ZFIN:ZDB-GENE-070117-501	unm tm130e	127	0.010419	121	0.0466623	164	2.29084	149	6.43914	[UBERON:FMA_76621-XAO_0003059-ZFA_0001424]
ZFIN:ZDB-GENE-070117-167	unm tt279c	128	0.010414	159	0.0436508	98	2.65618	62	9.41183	[PATO:0000407]
ZFIN:ZDB-GENE-030616-132	mycbp2	129	0.0104049	117	0.0474055	180	2.23869	20	11.1488	[PATO:0000462^inheres_in_part_of(UBERON:FMA_61992-MA_0000170-MIAA_0000105-XAO_0000011-ZFA_0000109)]
ZFIN:ZDB-GENE-070117-786	unm p32cqeg	130	0.0103575	126	0.0460441	178	2.24012	149	6.43914	[UBERON:FMA_76621-XAO_0003059-ZFA_0001424]
ZFIN:ZDB-GENE-070117-2285	pun	131	0.0103572	136	0.0456005	172	2.26506	149	6.43914	[UBERON:FMA_76621-XAO_0003059-ZFA_0001424]
ZFIN:ZDB-GENE-080318-9	unm b1128	132	0.0103218	144	0.0447861	130	2.47505	20	11.1488	[PATO:0000051^OBO_REL:inheres_in(UBERON:FMA_76621-XAO_0003059-ZFA_0001424)]
ZFIN:ZDB-GENE-080318-8	unm b1127	132	0.0103218	144	0.0447861	131	2.47505	20	11.1488	[PATO:0000051^OBO_REL:inheres_in(UBERON:FMA_76621-XAO_0003059-ZFA_0001424)]
ZFIN:ZDB-GENE-070117-2146	kik	134	0.0102716	162	0.043364	112	2.54787	149	6.43914	[UBERON:FMA_76621-XAO_0003059-ZFA_0001424]
ZFIN:ZDB-GENE-030825-6	birc2	135	0.0102662	153	0.0441176	141	2.4382	30	10.5638	[PATO:0000001^OBO_REL:towards(UBERON:FMA_50720-MA_0000061-MA_0000064-MIAA_0000034-XAO_0000114-ZFA_0000005)]
ZFIN:ZDB-GENE-041007-1	mybl2	136	0.010252	115	0.0475297	142	2.43448	128	6.88827	[PATO:0001507]
ZFIN:ZDB-GENE-050913-1	cwf19l2	137	0.0102106	137	0.0455746	139	2.44624	99	7.77956	[PATO:0000617]
ZFIN:ZDB-GENE-070117-253	unm tk259	138	0.0101797	118	0.0469055	167	2.27964	149	6.43914	[UBERON:FMA_76621-XAO_0003059-ZFA_0001424]
ZFIN:ZDB-GENE-070117-75	puo	139	0.0101599	116	0.0474934	156	2.34942	195	5.27433	[UBERON:FMA_45733-MA_0000589]
ZFIN:ZDB-GENE-980526-137	chrna1	140	0.0101413	95	0.0507426	192	2.20829	203	5.21019	[PATO:0000001^OBO_REL:inheres_in(UBERON:FBbt_00003126-FMA_20292-FMA_46490-FMA_49184-MA_0000341-MA_0002474-MIAA_0000038-WBbt_0005255-XAO_0000126-XAO_0003029-ZFA_0000547-ZFA_0000590-ZFA_0001027)]
ZFIN:ZDB-GENE-041007-3	twistnb	141	0.0101095	140	0.0451527	140	2.44624	99	7.77956	[PATO:0000617]
ZFIN:ZDB-GENE-040426-2140	nol5	142	0.0100947	122	0.0466321	147	2.39943	192	5.539	[PATO:0000406]
ZFIN:ZDB-GENE-070117-78	sff	143	0.0100854	114	0.047619	168	2.27825	195	5.27433	[UBERON:FMA_45733-MA_0000589]
ZFIN:ZDB-GENE-020905-2	copa	144	0.010082	135	0.0456298	143	2.43066	149	6.43914	[UBERON:FMA_76621-XAO_0003059-ZFA_0001424]
ZFIN:ZDB-GENE-070117-2184	luc	145	0.0100377	148	0.0445449	153	2.3652	149	6.43914	[UBERON:FMA_76621-XAO_0003059-ZFA_0001424]
ZFIN:ZDB-GENE-030114-9	pola1	146	0.00999725	149	0.0445183	133	2.46757	99	7.77956	[PATO:0000617]
ZFIN:ZDB-GENE-041124-3	ext2	147	0.00997411	109	0.048951	169	2.27271	202	5.21019	[PATO:0000001^OBO_REL:inheres_in(UBERON:FBbt_00003126-FMA_20292-FMA_46490-FMA_49184-MA_0000341-MA_0002474-MIAA_0000038-WBbt_0005255-XAO_0000126-XAO_0003029-ZFA_0000547-ZFA_0000590-ZFA_0001027)]
ZFIN:ZDB-GENE-070117-2338	sla	148	0.00991932	127	0.0459845	175	2.25689	149	6.43914	[UBERON:FMA_76621-XAO_0003059-ZFA_0001424]
ZFIN:ZDB-GENE-980526-253	mef2ca	149	0.00988875	139	0.0451654	125	2.48741	84	8.11905	[PATO:0000001^OBO_REL:inheres_in(UBERON:FMA_54398-MA_0001906-XAO_0003084-ZFA_0001273)]
ZFIN:ZDB-GENE-030421-3	plcg1	150	0.00988184	143	0.0448161	127	2.48476	99	7.77956	[PATO:0000617]
ZFIN:ZDB-GENE-040426-1828	plxnd1	151	0.00986685	197	0.0419441	105	2.6136	40	9.82687	[PATO:0000640]
ZFIN:ZDB-GENE-070117-2291	qam	152	0.00986101	205	0.0415315	135	2.46271	149	6.43914	[UBERON:FMA_76621-XAO_0003059-ZFA_0001424]
ZFIN:ZDB-GENE-040426-2854	skiv2l2	153	0.0098136	98	0.0502254	184	2.21837	128	6.88827	[PATO:0001507]
ZFIN:ZDB-GENE-071205-1	kof	154	0.00979987	166	0.0430925	93	2.69248	128	6.88827	[PATO:0001507]
ZFIN:ZDB-GENE-030131-2281	col4a5	155	0.00979653	108	0.0489771	158	2.32776	148	6.51459	[PATO:0001617]
ZFIN:ZDB-GENE-040712-6	ccm2	156	0.00977881	123	0.0463619	138	2.44749	71	9.0899	[PATO:0000467]
ZFIN:ZDB-GENE-021031-4	plod3	157	0.00975261	169	0.0430315	128	2.48172	149	6.43914	[UBERON:FMA_76621-XAO_0003059-ZFA_0001424]
ZFIN:ZDB-GENE-070117-559	unm tm97d	158	0.0097507	173	0.0427461	162	2.305	149	6.43914	[UBERON:FMA_76621-XAO_0003059-ZFA_0001424]
ZFIN:ZDB-GENE-070117-2107	ham	159	0.0097241	241	0.0402336	95	2.6654	84	8.11905	[PATO:0000001^OBO_REL:inheres_in(UBERON:FMA_54398-MA_0001906-XAO_0003084-ZFA_0001273)]
ZFIN:ZDB-GENE-040426-1960	atp6ap2	160	0.00956812	130	0.0459016	218	2.08701	204	4.89455	[UBERON:MIAA_0000242-XAO_0000096-ZFA_0001306]
ZFIN:ZDB-GENE-070117-2292	que	161	0.00950273	155	0.0439921	174	2.26404	149	6.43914	[UBERON:FMA_76621-XAO_0003059-ZFA_0001424]
ZFIN:ZDB-GENE-070117-210	unm th242b	162	0.00949808	165	0.043222	179	2.23918	149	6.43914	[UBERON:FMA_76621-XAO_0003059-ZFA_0001424]
ZFIN:ZDB-GENE-071108-1	psoriasis	163	0.00949124	125	0.0460441	165	2.28948	126	6.97887	[UBERON:CL_0000362-FMA_62411-ZFA_0009183]
ZFIN:ZDB-GENE-040801-106	glrbb	164	0.00945324	201	0.0416938	146	2.41717	149	6.43914	[UBERON:FMA_76621-XAO_0003059-ZFA_0001424]
ZFIN:ZDB-GENE-990415-180	nar	165	0.00940129	132	0.0456621	194	2.20534	204	4.89455	[UBERON:MIAA_0000242-XAO_0000096-ZFA_0001306]
ZFIN:ZDB-GENE-030131-555	krit1	166	0.00939729	203	0.04164	206	2.16882	90	8.06133	[PATO:0002014]
ZFIN:ZDB-GENE-070117-564	unm to219	167	0.00938262	199	0.0418027	154	2.36102	149	6.43914	[UBERON:FMA_76621-XAO_0003059-ZFA_0001424]
ZFIN:ZDB-GENE-070117-492	unm tx239	168	0.00936395	146	0.0445902	201	2.18512	149	6.43914	[UBERON:FMA_76621-XAO_0003059-ZFA_0001424]
ZFIN:ZDB-GENE-020419-27	mcm7	169	0.00933173	182	0.042328	132	2.46811	99	7.77956	[PATO:0000617]
ZFIN:ZDB-GENE-070117-2152	kon	170	0.00928017	172	0.0428195	173	2.26497	149	6.43914	[UBERON:FMA_76621-XAO_0003059-ZFA_0001424]
ZFIN:ZDB-GENE-070117-676	mgf	171	0.00925228	230	0.0406557	111	2.55743	114	7.60447	[PATO:0000587^inheres_in_part_of(UBERON:FBbt_00004508-FMA_54448-MA_0000261-MIAA_0000140-XAO_0000179-ZFA_0000107)]
ZFIN:ZDB-GENE-030131-574	ift88	172	0.0092455	141	0.0450392	144	2.42531	128	6.88827	[PATO:0001507]
ZFIN:ZDB-GENE-070117-1582	unm dtdi3	173	0.00923096	220	0.0409782	150	2.36752	149	6.43914	[UBERON:FMA_76621-XAO_0003059-ZFA_0001424]
ZFIN:ZDB-GENE-070117-2004	ctd	174	0.00920915	224	0.0407895	151	2.36752	149	6.43914	[UBERON:FMA_76621-XAO_0003059-ZFA_0001424]
ZFIN:ZDB-GENE-031210-1	slc24a5	175	0.00913554	177	0.0425532	163	2.30457	77	8.56383	[PATO:0001032^OBO_REL:inheres_in(UBERON:FBbt_00004508-FMA_54448-MA_0000261-MIAA_0000140-XAO_0000179-ZFA_0000107), PATO:0001608^OBO_REL:inheres_in(UBERON:FBbt_00004508-FMA_54448-MA_0000261-MIAA_0000140-XAO_0000179-ZFA_0000107)]
ZFIN:ZDB-GENE-070117-2335	sch	176	0.00912521	170	0.0429894	191	2.20909	149	6.43914	[UBERON:FMA_76621-XAO_0003059-ZFA_0001424]
ZFIN:ZDB-GENE-070117-2344	sml	177	0.00912346	223	0.040856	183	2.22548	149	6.43914	[UBERON:FMA_76621-XAO_0003059-ZFA_0001424]
ZFIN:ZDB-GENE-040728-1	mgc45866l	178	0.00912315	215	0.0411141	136	2.45429	99	7.77956	[PATO:0000617]
ZFIN:ZDB-GENE-040715-8	nup205	178	0.00912315	215	0.0411141	137	2.45429	99	7.77956	[PATO:0000617]
ZFIN:ZDB-GENE-070117-2046	exp	180	0.00912052	183	0.0423177	171	2.26538	149	6.43914	[UBERON:FMA_76621-XAO_0003059-ZFA_0001424]
ZFIN:ZDB-GENE-030131-5566	kiaa0947l	181	0.0090843	142	0.0449735	210	2.12146	204	4.89455	[UBERON:MIAA_0000242-XAO_0000096-ZFA_0001306]
ZFIN:ZDB-GENE-070117-2422	tnt	182	0.00906917	180	0.0424005	181	2.2304	149	6.43914	[UBERON:FMA_76621-XAO_0003059-ZFA_0001424]
ZFIN:ZDB-GENE-070627-6	gin5	183	0.0090266	250	0.0400267	82	2.74311	77	8.56383	[PATO:0001032^OBO_REL:inheres_in(UBERON:FBbt_00004508-FMA_54448-MA_0000261-MIAA_0000140-XAO_0000179-ZFA_0000107), PATO:0001608^OBO_REL:inheres_in(UBERON:FBbt_00004508-FMA_54448-MA_0000261-MIAA_0000140-XAO_0000179-ZFA_0000107)]
ZFIN:ZDB-GENE-070117-2029	dul	184	0.00902648	151	0.0442997	209	2.13475	204	4.89455	[UBERON:MIAA_0000242-XAO_0000096-ZFA_0001306]
ZFIN:ZDB-GENE-070117-1579	unm tc311x	185	0.00897297	222	0.0408573	177	2.2426	190	5.88201	[PATO:0000001^OBO_REL:inheres_in(UBERON:FMA_54396-MA_0001905-ZFA_0001227)]
ZFIN:ZDB-GENE-070117-331	unm to2a	186	0.008946	217	0.0410423	186	2.21626	149	6.43914	[UBERON:FMA_76621-XAO_0003059-ZFA_0001424]
ZFIN:ZDB-GENE-070427-5	gpa	187	0.00891694	192	0.0420776	123	2.49609	62	9.41183	[PATO:0000407]
ZFIN:ZDB-GENE-070117-432	unm tn21	188	0.00890769	219	0.0410156	182	2.22974	149	6.43914	[UBERON:FMA_76621-XAO_0003059-ZFA_0001424]
ZFIN:ZDB-GENE-070117-607	unm tu46	189	0.00889991	225	0.0407767	187	2.21626	149	6.43914	[UBERON:FMA_76621-XAO_0003059-ZFA_0001424]
ZFIN:ZDB-GENE-040426-1287	bysl	190	0.00889132	150	0.0443575	216	2.09233	223	4.51459	[PATO:0000587^inheres_in_part_of(UBERON:FMA_24728-MA_0002473)]
ZFIN:ZDB-GENE-070117-342	unm tg415	191	0.00888871	176	0.0425671	188	2.2154	149	6.43914	[UBERON:FMA_76621-XAO_0003059-ZFA_0001424]
ZFIN:ZDB-GENE-070117-274	unm tu238	192	0.00887428	189	0.0421885	190	2.21288	149	6.43914	[UBERON:FMA_76621-XAO_0003059-ZFA_0001424]
ZFIN:ZDB-GENE-070117-2373	sof	193	0.00887066	180	0.0424005	189	2.2154	149	6.43914	[UBERON:FMA_76621-XAO_0003059-ZFA_0001424]
ZFIN:ZDB-GENE-030131-6435	synbl	194	0.00885795	189	0.0421885	198	2.193	204	4.89455	[UBERON:MIAA_0000242-XAO_0000096-ZFA_0001306]
ZFIN:ZDB-GENE-070117-2321	bil	195	0.00882701	193	0.0420499	193	2.20795	204	4.89455	[UBERON:MIAA_0000242-XAO_0000096-ZFA_0001306]
ZFIN:ZDB-GENE-030131-8646	rpl9	196	0.00875956	168	0.0430464	204	2.17383	195	5.27433	[UBERON:FMA_45733-MA_0000589]
ZFIN:ZDB-GENE-030131-8663	rplp1	197	0.0087542	170	0.0429894	205	2.17383	195	5.27433	[UBERON:FMA_45733-MA_0000589]
ZFIN:ZDB-GENE-070117-497	unm tc313	198	0.00873967	231	0.0406025	195	2.20231	149	6.43914	[UBERON:FMA_76621-XAO_0003059-ZFA_0001424]
ZFIN:ZDB-GENE-070117-494	unm tv214a	198	0.00873967	231	0.0406025	196	2.20231	149	6.43914	[UBERON:FMA_76621-XAO_0003059-ZFA_0001424]
ZFIN:ZDB-GENE-070117-275	unm tf244	198	0.00873967	231	0.0406025	197	2.20231	149	6.43914	[UBERON:FMA_76621-XAO_0003059-ZFA_0001424]
ZFIN:ZDB-GENE-040426-764	nol10	201	0.00871498	154	0.044021	222	2.06001	223	4.51459	[PATO:0000587^inheres_in_part_of(UBERON:FMA_24728-MA_0002473)]
ZFIN:ZDB-GENE-070117-741	chy	202	0.00869671	167	0.0430809	185	2.21833	195	5.27433	[UBERON:FMA_45733-MA_0000589]
ZFIN:ZDB-GENE-030131-9837	rrp1	203	0.00865556	156	0.0438195	226	2.04404	223	4.51459	[PATO:0000587^inheres_in_part_of(UBERON:FMA_24728-MA_0002473)]
ZFIN:ZDB-GENE-030219-38	copb1	204	0.00863687	194	0.0420223	202	2.17922	149	6.43914	[UBERON:FMA_76621-XAO_0003059-ZFA_0001424]
ZFIN:ZDB-GENE-010724-7	copb2	205	0.00863687	194	0.0420223	202	2.17922	149	6.43914	[UBERON:FMA_76621-XAO_0003059-ZFA_0001424]
ZFIN:ZDB-GENE-010614-1	cxcr4b	206	0.00862889	207	0.0414805	148	2.37598	118	7.5243	[UBERON:FMA_45661-MA_0000442]
ZFIN:ZDB-GENE-070117-2297	rdy	207	0.00858505	211	0.0412304	166	2.2811	204	4.89455	[UBERON:MIAA_0000242-XAO_0000096-ZFA_0001306]
ZFIN:ZDB-GENE-070117-39	gin10	208	0.00854792	217	0.0410423	241	1.94376	194	5.49058	[PATO:0000117^OBO_REL:inheres_in(UBERON:CARO_0000027-FBbt_00004927-FBbt_00004928-FBbt_00007004-FMA_45664-FMA_7210-MA_0000396-MA_0000411-MIAA_0000029-MIAA_0000132-WBbt_0006794-XAO_0000155-XAO_0000157-XAO_0003006-ZFA_0000242-ZFA_0000598)]
ZFIN:ZDB-GENE-070117-71	cnc	209	0.00852158	174	0.0426951	211	2.11481	195	5.27433	[UBERON:FMA_45733-MA_0000589]
ZFIN:ZDB-GENE-040718-259	atp6v1f	210	0.00848515	163	0.043364	240	1.95507	223	4.51459	[PATO:0000587^inheres_in_part_of(UBERON:FMA_24728-MA_0002473)]
ZFIN:ZDB-GENE-040513-7	cdh23	211	0.00846128	204	0.0415854	145	2.4174	128	6.88827	[PATO:0001507]
ZFIN:ZDB-GENE-030131-1723	flj12716l	212	0.00845457	196	0.0419672	200	2.18606	204	4.89455	[UBERON:MIAA_0000242-XAO_0000096-ZFA_0001306]
ZFIN:ZDB-GENE-051113-60	spna2	213	0.00841984	184	0.0423077	157	2.34499	127	6.96557	[PATO:0000573]
ZFIN:ZDB-GENE-020419-23	atp6v0c	214	0.0083869	208	0.0414776	149	2.36828	128	6.88827	[PATO:0001507]
ZFIN:ZDB-GENE-040426-2833	stxbp3	215	0.00836062	185	0.0423001	231	2.00495	223	4.51459	[PATO:0000587^inheres_in_part_of(UBERON:FMA_24728-MA_0002473)]
ZFIN:ZDB-GENE-030131-6986	ncl	216	0.00829244	178	0.0424685	235	1.98057	223	4.51459	[PATO:0000587^inheres_in_part_of(UBERON:FMA_24728-MA_0002473)]
ZFIN:ZDB-GENE-040718-150	ufd1l	217	0.00828453	200	0.0417772	221	2.06401	204	4.89455	[UBERON:MIAA_0000242-XAO_0000096-ZFA_0001306]
ZFIN:ZDB-GENE-040426-811	rpsa	218	0.00826642	186	0.0422164	228	2.00995	223	4.51459	[PATO:0000587^inheres_in_part_of(UBERON:FMA_24728-MA_0002473)]
ZFIN:ZDB-GENE-030131-8064	nkapl	218	0.00826642	186	0.0422164	228	2.00995	223	4.51459	[PATO:0000587^inheres_in_part_of(UBERON:FMA_24728-MA_0002473)]
ZFIN:ZDB-GENE-030131-6378	heatr1	218	0.00826642	186	0.0422164	228	2.00995	223	4.51459	[PATO:0000587^inheres_in_part_of(UBERON:FMA_24728-MA_0002473)]
ZFIN:ZDB-GENE-070117-2079	aoi	221	0.00824701	249	0.0400525	199	2.18735	204	4.89455	[UBERON:MIAA_0000242-XAO_0000096-ZFA_0001306]
ZFIN:ZDB-GENE-070117-2207	mlk	222	0.00820475	234	0.0405494	208	2.16426	204	4.89455	[UBERON:MIAA_0000242-XAO_0000096-ZFA_0001306]
ZFIN:ZDB-GENE-990603-6	prim1	223	0.00815501	160	0.0435339	217	2.09001	246	4.50254	[PATO:0000141^inheres_in_part_of(UBERON:FBbt_00005093-FMA_7157-MA_0000016-MIAA_0000026-WBbt_0005735-XAO_0000177-ZFA_0000396)]
ZFIN:ZDB-GENE-040426-2536	cdipt	224	0.00812257	212	0.0411687	213	2.09251	204	4.89455	[UBERON:MIAA_0000242-XAO_0000096-ZFA_0001306]
ZFIN:ZDB-GENE-021219-1	flj20508l	224	0.00812257	212	0.0411687	213	2.09251	204	4.89455	[UBERON:MIAA_0000242-XAO_0000096-ZFA_0001306]
ZFIN:ZDB-GENE-040923-1	slc25a24l	224	0.00812257	212	0.0411687	223	2.05016	204	4.89455	[UBERON:MIAA_0000242-XAO_0000096-ZFA_0001306]
ZFIN:ZDB-GENE-070117-237	unm m756	227	0.00801674	240	0.0402375	212	2.1146	204	4.89455	[UBERON:MIAA_0000242-XAO_0000096-ZFA_0001306]
ZFIN:ZDB-GENE-070117-215	unm tl17a	228	0.00801235	239	0.0402906	227	2.03916	204	4.89455	[UBERON:MIAA_0000242-XAO_0000096-ZFA_0001306]
ZFIN:ZDB-GENE-030616-450	epb41l5	229	0.00799324	134	0.0456349	232	2.00454	248	4.13013	[GO:0048646]
ZFIN:ZDB-GENE-040907-1	rfc5	230	0.00795651	242	0.0402145	207	2.166	195	5.27433	[UBERON:FMA_45733-MA_0000589]
ZFIN:ZDB-GENE-040426-1076	eif3g	231	0.0079386	191	0.0420842	248	1.87286	223	4.51459	[PATO:0000587^inheres_in_part_of(UBERON:FMA_24728-MA_0002473)]
ZFIN:ZDB-GENE-070117-2365	bch	232	0.00792402	235	0.0405405	239	1.9626	223	4.51459	[PATO:0000587^inheres_in_part_of(UBERON:FMA_24728-MA_0002473)]
ZFIN:ZDB-GENE-040109-1	nol5a	233	0.00791002	210	0.0412508	236	1.97604	223	4.51459	[PATO:0000587^inheres_in_part_of(UBERON:FMA_24728-MA_0002473)]
ZFIN:ZDB-GENE-070117-2223	nev	234	0.00790566	158	0.0437018	224	2.0444	250	3.86185	[PATO:0000001^inheres_in_part_of(UBERON:FBbt_00004508-FMA_54448-MA_0000261-MIAA_0000140-XAO_0000179-ZFA_0000107)]
ZFIN:ZDB-GENE-040426-804	wdr1	235	0.00787358	245	0.0400534	219	2.08634	204	4.89455	[UBERON:MIAA_0000242-XAO_0000096-ZFA_0001306]
ZFIN:ZDB-GENE-030131-333	wdr82	236	0.00787358	245	0.0400534	225	2.04419	204	4.89455	[UBERON:MIAA_0000242-XAO_0000096-ZFA_0001306]
ZFIN:ZDB-GENE-030616-554	slc17a6	237	0.00784824	202	0.0416934	213	2.09251	246	4.50254	[PATO:0000141^inheres_in_part_of(UBERON:FBbt_00005093-FMA_7157-MA_0000016-MIAA_0000026-WBbt_0005735-XAO_0000177-ZFA_0000396)]
ZFIN:ZDB-GENE-070117-1565	dri	238	0.00784437	227	0.0406938	233	1.99121	223	4.51459	[PATO:0000587^inheres_in_part_of(UBERON:FMA_24728-MA_0002473)]
ZFIN:ZDB-GENE-030131-2085	rpl14	239	0.00781721	236	0.0404778	233	1.99121	223	4.51459	[PATO:0000587^inheres_in_part_of(UBERON:FMA_24728-MA_0002473)]
ZFIN:ZDB-GENE-001207-1	supt5h	240	0.00779211	206	0.0415045	242	1.92833	249	4.07198	[UBERON:FMA_7192-MA_0002443]
ZFIN:ZDB-GENE-040426-1333	surf6l	241	0.00772182	237	0.0404241	237	1.96889	223	4.51459	[PATO:0000587^inheres_in_part_of(UBERON:FMA_24728-MA_0002473)]
ZFIN:ZDB-GENE-030131-9864	mybbp1a	242	0.00772182	237	0.0404241	237	1.96889	223	4.51459	[PATO:0000587^inheres_in_part_of(UBERON:FMA_24728-MA_0002473)]
ZFIN:ZDB-GENE-070117-2268	pic	243	0.00765508	221	0.0409091	220	2.06424	204	4.89455	[UBERON:MIAA_0000242-XAO_0000096-ZFA_0001306]
ZFIN:ZDB-GENE-030131-2492	sf1	244	0.00762149	226	0.0407754	244	1.915	223	4.51459	[PATO:0000587^inheres_in_part_of(UBERON:FMA_24728-MA_0002473)]
ZFIN:ZDB-GENE-030131-2590	clint1	245	0.00761165	228	0.0406667	245	1.9052	223	4.51459	[PATO:0000587^inheres_in_part_of(UBERON:FMA_24728-MA_0002473)]
ZFIN:ZDB-GENE-030131-977	cct5	246	0.00757522	228	0.0406667	246	1.90153	223	4.51459	[PATO:0000587^inheres_in_part_of(UBERON:FMA_24728-MA_0002473)]
ZFIN:ZDB-GENE-031001-8	ddx27	247	0.00752453	245	0.0400534	243	1.92216	223	4.51459	[PATO:0000587^inheres_in_part_of(UBERON:FMA_24728-MA_0002473)]
ZFIN:ZDB-GENE-040426-1707	skp1	248	0.00741225	245	0.0400534	247	1.88303	223	4.51459	[PATO:0000587^inheres_in_part_of(UBERON:FMA_24728-MA_0002473)]
ZFIN:ZDB-GENE-040831-4	gle1l	249	0.00737823	243	0.040107	249	1.86313	223	4.51459	[PATO:0000587^inheres_in_part_of(UBERON:FMA_24728-MA_0002473)]
ZFIN:ZDB-GENE-040823-3	prpf3	249	0.00737823	243	0.040107	249	1.86313	223	4.51459	[PATO:0000587^inheres_in_part_of(UBERON:FMA_24728-MA_0002473)]
