# Supplementary material for: Linking Human Diseases to Animal Models Using Ontology-Based Phenotype Annotation
Source: PLoS Biol. 2009 Nov 24;7(11):e1000247. doi: 10.1371/journal.pbio.1000247 (PMC2774506; doi:10.1371/journal.pbio.1000247)
Supplement: Table S11 — Comparison between human TNNT2 and zebrafish genes. The top 250 genes (by simJ) are reported, together with the rank and score for each metric (simIC, simJ, avgICCS, and maxIC). Additionally, the maxIC phenotype is reported using ontology identifiers. See Materials and Methods for a list of ontology prefixes. Known sequence orthologs are highlighted in yellow and listed in Table 6, if present. Genes at rank 1 are listed in Table 7. (0.08 MB XLS) [file pbio.1000247.s011.xls]

## Sheet: NCBI_Gene_7139-vs-allg-allscore
zfin gene id	zfin gene name	simIC rank	simIC	simJ rank	simJ	avgICCS rank	avgICCS	maxIC rank	maxIC	maxIC phenotype
ZFIN:ZDB-GENE-050616-5	cx36.7	1	0.051307	1	0.146484	2	3.86477	3	6.39391	[PATO:0001571^OBO_REL:inheres_in(UBERON:FBbt_00003154-FMA_7088-MA_0000072-MIAA_0000036-XAO_0000064-ZFA_0000114)]
ZFIN:ZDB-GENE-991123-5	vmhc	2	0.0428384	4	0.13467	1	3.88607	4	6.35872	[PATO:0000586^OBO_REL:inheres_in(UBERON:FMA_7100-MA_0000091-ZFA_0000009), PATO:0001202^OBO_REL:inheres_in(UBERON:FMA_7100-MA_0000091-ZFA_0000009)]
ZFIN:ZDB-GENE-030131-6778	rtf1	3	0.041418	2	0.144208	99	2.44211	89	4.1357	[MP:0000266, PATO:0000051^OBO_REL:inheres_in(MA:0000072)]
ZFIN:ZDB-GENE-030113-2	ttna	4	0.040788	11	0.122353	15	3.16855	1	7.9264	[PATO:0001624]
ZFIN:ZDB-GENE-031112-1	myh6	5	0.039436	5	0.132565	3	3.74529	15	5.13757	[PATO:0000051^OBO_REL:inheres_in(UBERON:FMA_7100-MA_0000091-ZFA_0000009)]
ZFIN:ZDB-GENE-990415-9	acvr1	6	0.0369284	21	0.111364	19	3.11092	1	7.9264	[PATO:0001624]
ZFIN:ZDB-GENE-070627-2	gin1	7	0.0363581	3	0.137184	30	2.89928	18	5.04376	[PATO:0000586^OBO_REL:inheres_in(UBERON:FBbt_00003154-FMA_7088-MA_0000072-MIAA_0000036-XAO_0000064-ZFA_0000114), PATO:0000644^OBO_REL:inheres_in(UBERON:FBbt_00003154-FMA_7088-MA_0000072-MIAA_0000036-XAO_0000064-ZFA_0000114)]
ZFIN:ZDB-GENE-070117-512	grb	8	0.0351578	9	0.123552	56	2.6273	13	5.21019	[PATO:0001571]
ZFIN:ZDB-GENE-980526-340	gata5	9	0.0345307	6	0.131206	4	3.61676	5	6.2419	[PATO:0000052^OBO_REL:inheres_in(UBERON:FBbt_00003154-FMA_7088-MA_0000072-MIAA_0000036-XAO_0000064-ZFA_0000114)]
ZFIN:ZDB-GENE-051108-1	hmgcrb	10	0.0344373	12	0.119107	16	3.1317	9	5.96557	[PATO:0000591]
ZFIN:ZDB-GENE-040426-1435	ilk	11	0.0333949	15	0.117347	11	3.28695	13	5.21019	[PATO:0001571]
ZFIN:ZDB-GENE-000526-1	hey2	12	0.0322366	63	0.101695	6	3.35476	7	5.98556	[PATO:0000586^inheres_in_part_of(UBERON:FBbt_00003154-FMA_7088-MA_0000072-MIAA_0000036-XAO_0000064-ZFA_0000114)]
ZFIN:ZDB-GENE-990415-277	foxn4	13	0.0314302	7	0.128852	48	2.70985	22	4.66498	[PATO:0000169]
ZFIN:ZDB-GENE-030131-555	krit1	14	0.0290693	19	0.112565	23	2.93556	18	5.04376	[PATO:0000586^OBO_REL:inheres_in(UBERON:FBbt_00003154-FMA_7088-MA_0000072-MIAA_0000036-XAO_0000064-ZFA_0000114), PATO:0000644^OBO_REL:inheres_in(UBERON:FBbt_00003154-FMA_7088-MA_0000072-MIAA_0000036-XAO_0000064-ZFA_0000114)]
ZFIN:ZDB-GENE-050809-1	slc8a1a	15	0.0290116	14	0.117647	5	3.3605	15	5.11537	[PATO:0000001^OBO_REL:inheres_in(UBERON:FMA_7100-MA_0000091-ZFA_0000009)]
ZFIN:ZDB-GENE-070117-2515	clo	16	0.0285704	136	0.098646	35	2.82583	7	5.98556	[PATO:0000586^inheres_in_part_of(UBERON:FBbt_00003154-FMA_7088-MA_0000072-MIAA_0000036-XAO_0000064-ZFA_0000114)]
ZFIN:ZDB-GENE-050913-90	aplnrb	17	0.0277904	8	0.128713	51	2.68011	21	4.71974	[PATO:0000117^OBO_REL:inheres_in(UBERON:FBbt_00003154-FMA_7088-MA_0000072-MIAA_0000036-XAO_0000064-ZFA_0000114)]
ZFIN:ZDB-GENE-040702-5	kcnh2	18	0.027553	17	0.116848	29	2.9242	15	5.11537	[PATO:0000001^OBO_REL:inheres_in(UBERON:FMA_7100-MA_0000091-ZFA_0000009)]
ZFIN:ZDB-GENE-070117-2442	tur	19	0.0264796	16	0.117089	31	2.87185	22	4.66498	[PATO:0000169]
ZFIN:ZDB-GENE-040704-44	fam32al	20	0.0261566	86	0.0995146	72	2.47347	9	5.96557	[PATO:0000591]
ZFIN:ZDB-GENE-070117-2137	jam	21	0.0261446	13	0.117857	12	3.25098	22	4.66498	[PATO:0000169]
ZFIN:ZDB-GENE-070117-2360	sky	22	0.0256874	18	0.114187	12	3.25098	22	4.66498	[PATO:0000169]
ZFIN:ZDB-GENE-070117-2060	fub	23	0.0253116	20	0.111486	69	2.52024	22	4.66498	[PATO:0000169]
ZFIN:ZDB-GENE-070117-1124	unm t30379	24	0.0238933	10	0.123077	20	3.03929	6	6.04726	[PATO:0000584]
ZFIN:ZDB-GENE-070117-2327	ruz	25	0.0231875	205	0.0936902	14	3.22838	20	4.99905	[PATO:0000051^inheres_in_part_of(UBERON:FBbt_00005069-FMA_30316-FMA_32558-MA_0000015-MIAA_0000025-WBbt_0005737-XAO_0000172-ZFA_0000548-ZFA_0005145)]
ZFIN:ZDB-GENE-991124-7	tbx5	26	0.0229085	52	0.106109	64	2.59008	90	4.09895	[PATO:0000051^OBO_REL:inheres_in(UBERON:FBbt_00003154-FMA_7088-MA_0000072-MIAA_0000036-XAO_0000064-ZFA_0000114)]
ZFIN:ZDB-GENE-070117-2152	kon	27	0.0219817	144	0.0977011	95	2.46766	22	4.66498	[PATO:0000169]
ZFIN:ZDB-GENE-070117-2463	web	28	0.0218289	50	0.106796	65	2.57144	22	4.66498	[PATO:0000169]
ZFIN:ZDB-GENE-051113-60	spna2	29	0.0218054	140	0.0981912	100	2.43661	22	4.66498	[PATO:0000169]
ZFIN:ZDB-GENE-040426-2784	sass6	30	0.0217495	56	0.104034	215	1.90808	90	4.09895	[PATO:0000051^OBO_REL:inheres_in(UBERON:FBbt_00003154-FMA_7088-MA_0000072-MIAA_0000036-XAO_0000064-ZFA_0000114)]
ZFIN:ZDB-GENE-990615-5	tbx16	31	0.0217294	220	0.0923913	73	2.47063	22	4.66498	[PATO:0000169]
ZFIN:ZDB-GENE-040718-181	sf3b5	32	0.0216868	85	0.0996979	107	2.35284	22	4.66498	[PATO:0000169]
ZFIN:ZDB-GENE-070117-202	unm m195	33	0.0213718	78	0.100358	162	2.12445	93	3.85571	[PATO:0000001^OBO_REL:inheres_in(UBERON:FBbt_00005069-FMA_30316-FMA_32558-MA_0000015-MIAA_0000025-WBbt_0005737-XAO_0000172-ZFA_0000548-ZFA_0005145)]
ZFIN:ZDB-GENE-030114-9	pola1	34	0.0212917	145	0.0976331	55	2.6351	22	4.66498	[PATO:0000169]
ZFIN:ZDB-GENE-070117-71	cnc	35	0.0212432	57	0.103659	172	2.04712	96	3.56508	[PATO:0000001^OBO_REL:inheres_in(UBERON:FBbt_00003154-FMA_7088-MA_0000072-MIAA_0000036-XAO_0000064-ZFA_0000114)]
ZFIN:ZDB-GENE-041007-3	twistnb	36	0.0212362	148	0.0970588	44	2.7813	22	4.66498	[PATO:0000169]
ZFIN:ZDB-GENE-021011-2	pak2a	37	0.0212325	76	0.100917	50	2.68848	90	4.09895	[PATO:0000051^OBO_REL:inheres_in(UBERON:FBbt_00003154-FMA_7088-MA_0000072-MIAA_0000036-XAO_0000064-ZFA_0000114)]
ZFIN:ZDB-GENE-070117-2202	bad(l)	38	0.021173	75	0.100977	66	2.55589	22	4.66498	[PATO:0000169]
ZFIN:ZDB-GENE-070117-2477	yqe	39	0.0211586	49	0.107143	37	2.81888	22	4.66498	[PATO:0000169]
ZFIN:ZDB-GENE-021115-7	plk1	40	0.0211157	58	0.101911	24	2.92977	22	4.66498	[PATO:0000169]
ZFIN:ZDB-GENE-020419-36	baf53a	40	0.0211157	58	0.101911	24	2.92977	22	4.66498	[PATO:0000169]
ZFIN:ZDB-GENE-020419-31	ncbp2	40	0.0211157	58	0.101911	24	2.92977	22	4.66498	[PATO:0000169]
ZFIN:ZDB-GENE-020419-21	smc4	40	0.0211157	58	0.101911	24	2.92977	22	4.66498	[PATO:0000169]
ZFIN:ZDB-GENE-020419-13	ars2	40	0.0211157	58	0.101911	24	2.92977	22	4.66498	[PATO:0000169]
ZFIN:ZDB-GENE-070117-2004	ctd	40	0.0211057	177	0.0948276	7	3.33875	11	5.45763	[PATO:0000052^inheres_in_part_of(UBERON:FBbt_00000015-FMA_9576-MA_0000022-MIAA_0000295)]
ZFIN:ZDB-GENE-070117-2407	str	46	0.021089	23	0.107807	37	2.81888	22	4.66498	[PATO:0000169]
ZFIN:ZDB-GENE-070117-2293	quh	46	0.021089	23	0.107807	37	2.81888	22	4.66498	[PATO:0000169]
ZFIN:ZDB-GENE-070117-2278	plk	46	0.021089	23	0.107807	37	2.81888	22	4.66498	[PATO:0000169]
ZFIN:ZDB-GENE-070117-2270	pip	46	0.021089	23	0.107807	37	2.81888	22	4.66498	[PATO:0000169]
ZFIN:ZDB-GENE-070117-2178	loa	46	0.021089	23	0.107807	37	2.81888	22	4.66498	[PATO:0000169]
ZFIN:ZDB-GENE-070117-2166	leg	46	0.021089	23	0.107807	37	2.81888	22	4.66498	[PATO:0000169]
ZFIN:ZDB-GENE-990714-24	tcp1	52	0.0210527	167	0.0962099	36	2.82146	22	4.66498	[PATO:0000169]
ZFIN:ZDB-GENE-070117-2122	hel	53	0.020868	51	0.106618	45	2.77664	22	4.66498	[PATO:0000169]
ZFIN:ZDB-GENE-070117-2395	sth	54	0.0208417	53	0.106007	98	2.44382	22	4.66498	[PATO:0000169]
ZFIN:ZDB-GENE-050913-1	cwf19l2	55	0.0207766	179	0.0945559	49	2.69572	22	4.66498	[PATO:0000169]
ZFIN:ZDB-GENE-030131-9184	rps3a	56	0.0207284	83	0.1	67	2.54265	22	4.66498	[PATO:0000169]
ZFIN:ZDB-GENE-070117-2077	ful	57	0.0207158	178	0.0947075	171	2.06441	22	4.66498	[PATO:0000169]
ZFIN:ZDB-GENE-030109-2	ruvbl1	58	0.0206669	139	0.0983607	17	3.12817	22	4.66498	[PATO:0000169]
ZFIN:ZDB-GENE-070117-2482	ziz	59	0.0204494	218	0.092437	18	3.11599	11	5.45763	[PATO:0000052^inheres_in_part_of(UBERON:FBbt_00000015-FMA_9576-MA_0000022-MIAA_0000295)]
ZFIN:ZDB-GENE-000426-1	fn1	60	0.0203655	74	0.101227	70	2.49532	22	4.66498	[PATO:0000169]
ZFIN:ZDB-GENE-030109-1	ruvbl2	61	0.0202257	218	0.092437	53	2.64782	22	4.66498	[PATO:0000169]
ZFIN:ZDB-GENE-040930-4	polr1d	62	0.0202013	153	0.0966767	57	2.62515	22	4.66498	[PATO:0000169]
ZFIN:ZDB-GENE-040715-1	mcm3ap	62	0.0202013	153	0.0966767	57	2.62515	22	4.66498	[PATO:0000169]
ZFIN:ZDB-GENE-040426-940	cdc37	62	0.0202013	153	0.0966767	57	2.62515	22	4.66498	[PATO:0000169]
ZFIN:ZDB-GENE-040426-2764	mizf	62	0.0202013	153	0.0966767	57	2.62515	22	4.66498	[PATO:0000169]
ZFIN:ZDB-GENE-030131-9878	noc3l	62	0.0202013	153	0.0966767	57	2.62515	22	4.66498	[PATO:0000169]
ZFIN:ZDB-GENE-030131-8442	eif3d	62	0.0202013	153	0.0966767	57	2.62515	22	4.66498	[PATO:0000169]
ZFIN:ZDB-GENE-030131-3197	zmat2	62	0.0202013	153	0.0966767	57	2.62515	22	4.66498	[PATO:0000169]
ZFIN:ZDB-GENE-040728-3	pdcd7	69	0.0201968	78	0.100358	8	3.32866	22	4.66498	[PATO:0000169]
ZFIN:ZDB-GENE-031001-11	hspa5	69	0.0201968	78	0.100358	8	3.32866	22	4.66498	[PATO:0000169]
ZFIN:ZDB-GENE-020423-4	naca	69	0.0201968	78	0.100358	8	3.32866	22	4.66498	[PATO:0000169]
ZFIN:ZDB-GENE-001212-1	atp1a1	72	0.0199865	240	0.0913706	230	1.76678	22	4.66498	[PATO:0000169]
ZFIN:ZDB-GENE-070117-2415	tan	73	0.0199591	83	0.1	52	2.66766	22	4.66498	[PATO:0000169]
ZFIN:ZDB-GENE-041011-3	ppp1r12a	74	0.0198785	137	0.0985915	34	2.82785	22	4.66498	[PATO:0000169]
ZFIN:ZDB-GENE-040426-1333	surf6l	75	0.0198466	175	0.0949555	102	2.37288	22	4.66498	[PATO:0000169]
ZFIN:ZDB-GENE-030131-9864	mybbp1a	75	0.0198466	176	0.0949555	102	2.37288	22	4.66498	[PATO:0000169]
ZFIN:ZDB-GENE-030131-2085	rpl14	77	0.0198397	171	0.0955224	68	2.54265	22	4.66498	[PATO:0000169]
ZFIN:ZDB-GENE-070117-2414	sug	78	0.0198386	94	0.0993151	97	2.45024	22	4.66498	[PATO:0000169]
ZFIN:ZDB-GENE-040727-4	med19	79	0.0197432	146	0.097561	22	2.98903	22	4.66498	[PATO:0000169]
ZFIN:ZDB-GENE-070117-2373	sof	80	0.0197268	206	0.0936639	21	2.99939	22	4.66498	[PATO:0000169]
ZFIN:ZDB-GENE-070117-2029	dul	81	0.019569	220	0.0923913	169	2.07266	22	4.66498	[PATO:0000169]
ZFIN:ZDB-GENE-070117-2015	dgn	82	0.01954	204	0.0939394	212	1.91701	22	4.66498	[PATO:0000169]
ZFIN:ZDB-GENE-070117-2032	alb	83	0.0194713	217	0.0925553	150	2.22524	21	4.71974	[PATO:0000117^OBO_REL:inheres_in(UBERON:FBbt_00003154-FMA_7088-MA_0000072-MIAA_0000036-XAO_0000064-ZFA_0000114)]
ZFIN:ZDB-GENE-070117-75	puo	84	0.0194406	166	0.0963173	201	1.99235	96	3.56508	[PATO:0000001^OBO_REL:inheres_in(UBERON:FBbt_00003154-FMA_7088-MA_0000072-MIAA_0000036-XAO_0000064-ZFA_0000114)]
ZFIN:ZDB-GENE-070117-1448	unm t30644	85	0.0194127	43	0.107527	74	2.46779	96	3.56508	[PATO:0000001^OBO_REL:inheres_in(UBERON:FBbt_00003154-FMA_7088-MA_0000072-MIAA_0000036-XAO_0000064-ZFA_0000114)]
ZFIN:ZDB-GENE-070117-1097	unm t30544	86	0.0194127	43	0.107527	74	2.46779	96	3.56508	[PATO:0000001^OBO_REL:inheres_in(UBERON:FBbt_00003154-FMA_7088-MA_0000072-MIAA_0000036-XAO_0000064-ZFA_0000114)]
ZFIN:ZDB-GENE-070117-1095	unm t30588	87	0.0194127	43	0.107527	74	2.46779	96	3.56508	[PATO:0000001^OBO_REL:inheres_in(UBERON:FBbt_00003154-FMA_7088-MA_0000072-MIAA_0000036-XAO_0000064-ZFA_0000114)]
ZFIN:ZDB-GENE-070117-1093	unm t30643	88	0.0194127	43	0.107527	74	2.46779	96	3.56508	[PATO:0000001^OBO_REL:inheres_in(UBERON:FBbt_00003154-FMA_7088-MA_0000072-MIAA_0000036-XAO_0000064-ZFA_0000114)]
ZFIN:ZDB-GENE-070117-1092	unm t30706	89	0.0194127	43	0.107527	74	2.46779	96	3.56508	[PATO:0000001^OBO_REL:inheres_in(UBERON:FBbt_00003154-FMA_7088-MA_0000072-MIAA_0000036-XAO_0000064-ZFA_0000114)]
ZFIN:ZDB-GENE-070117-1091	unm t30705	90	0.0194127	43	0.107527	74	2.46779	96	3.56508	[PATO:0000001^OBO_REL:inheres_in(UBERON:FBbt_00003154-FMA_7088-MA_0000072-MIAA_0000036-XAO_0000064-ZFA_0000114)]
ZFIN:ZDB-GENE-040426-811	rpsa	91	0.019324	223	0.092219	102	2.37288	22	4.66498	[PATO:0000169]
ZFIN:ZDB-GENE-030131-8064	nkapl	91	0.019324	223	0.092219	102	2.37288	22	4.66498	[PATO:0000169]
ZFIN:ZDB-GENE-030131-6378	heatr1	91	0.019324	223	0.092219	102	2.37288	22	4.66498	[PATO:0000169]
ZFIN:ZDB-GENE-070117-873	unm s277	94	0.0191659	22	0.11	200	2.01796	96	3.56508	[PATO:0000001^OBO_REL:inheres_in(UBERON:FBbt_00003154-FMA_7088-MA_0000072-MIAA_0000036-XAO_0000064-ZFA_0000114)]
ZFIN:ZDB-GENE-070117-983	unm t30499	95	0.0190913	29	0.107692	74	2.46779	96	3.56508	[PATO:0000001^OBO_REL:inheres_in(UBERON:FBbt_00003154-FMA_7088-MA_0000072-MIAA_0000036-XAO_0000064-ZFA_0000114)]
ZFIN:ZDB-GENE-070117-981	unm t30412	95	0.0190913	29	0.107692	74	2.46779	96	3.56508	[PATO:0000001^OBO_REL:inheres_in(UBERON:FBbt_00003154-FMA_7088-MA_0000072-MIAA_0000036-XAO_0000064-ZFA_0000114)]
ZFIN:ZDB-GENE-070117-950	unm t30707	95	0.0190913	29	0.107692	74	2.46779	96	3.56508	[PATO:0000001^OBO_REL:inheres_in(UBERON:FBbt_00003154-FMA_7088-MA_0000072-MIAA_0000036-XAO_0000064-ZFA_0000114)]
ZFIN:ZDB-GENE-070117-1488	unm t30550	95	0.0190913	29	0.107692	74	2.46779	96	3.56508	[PATO:0000001^OBO_REL:inheres_in(UBERON:FBbt_00003154-FMA_7088-MA_0000072-MIAA_0000036-XAO_0000064-ZFA_0000114)]
ZFIN:ZDB-GENE-070117-1464	unm t30591	95	0.0190913	29	0.107692	74	2.46779	96	3.56508	[PATO:0000001^OBO_REL:inheres_in(UBERON:FBbt_00003154-FMA_7088-MA_0000072-MIAA_0000036-XAO_0000064-ZFA_0000114)]
ZFIN:ZDB-GENE-070117-1455	unm t30592	95	0.0190913	29	0.107692	74	2.46779	96	3.56508	[PATO:0000001^OBO_REL:inheres_in(UBERON:FBbt_00003154-FMA_7088-MA_0000072-MIAA_0000036-XAO_0000064-ZFA_0000114)]
ZFIN:ZDB-GENE-070117-1354	unm t30568	95	0.0190913	29	0.107692	74	2.46779	96	3.56508	[PATO:0000001^OBO_REL:inheres_in(UBERON:FBbt_00003154-FMA_7088-MA_0000072-MIAA_0000036-XAO_0000064-ZFA_0000114)]
ZFIN:ZDB-GENE-070117-1353	unm t30642	95	0.0190913	29	0.107692	74	2.46779	96	3.56508	[PATO:0000001^OBO_REL:inheres_in(UBERON:FBbt_00003154-FMA_7088-MA_0000072-MIAA_0000036-XAO_0000064-ZFA_0000114)]
ZFIN:ZDB-GENE-070117-1108	unm t30348	95	0.0190913	29	0.107692	74	2.46779	96	3.56508	[PATO:0000001^OBO_REL:inheres_in(UBERON:FBbt_00003154-FMA_7088-MA_0000072-MIAA_0000036-XAO_0000064-ZFA_0000114)]
ZFIN:ZDB-GENE-070117-1018	unm t30411	95	0.0190913	29	0.107692	74	2.46779	96	3.56508	[PATO:0000001^OBO_REL:inheres_in(UBERON:FBbt_00003154-FMA_7088-MA_0000072-MIAA_0000036-XAO_0000064-ZFA_0000114)]
ZFIN:ZDB-GENE-070117-1017	unm t30547	95	0.0190913	29	0.107692	74	2.46779	96	3.56508	[PATO:0000001^OBO_REL:inheres_in(UBERON:FBbt_00003154-FMA_7088-MA_0000072-MIAA_0000036-XAO_0000064-ZFA_0000114)]
ZFIN:ZDB-GENE-070117-1016	unm t30654	95	0.0190913	29	0.107692	74	2.46779	96	3.56508	[PATO:0000001^OBO_REL:inheres_in(UBERON:FBbt_00003154-FMA_7088-MA_0000072-MIAA_0000036-XAO_0000064-ZFA_0000114)]
ZFIN:ZDB-GENE-070117-1015	unm t30353	95	0.0190913	29	0.107692	74	2.46779	96	3.56508	[PATO:0000001^OBO_REL:inheres_in(UBERON:FBbt_00003154-FMA_7088-MA_0000072-MIAA_0000036-XAO_0000064-ZFA_0000114)]
ZFIN:ZDB-GENE-070117-1014	unm t30381	95	0.0190913	29	0.107692	74	2.46779	96	3.56508	[PATO:0000001^OBO_REL:inheres_in(UBERON:FBbt_00003154-FMA_7088-MA_0000072-MIAA_0000036-XAO_0000064-ZFA_0000114)]
ZFIN:ZDB-GENE-070117-2422	tnt	109	0.0190159	206	0.0936639	54	2.64031	22	4.66498	[PATO:0000169]
ZFIN:ZDB-GENE-040426-1076	eif3g	110	0.0186839	142	0.0978593	231	1.7394	96	3.56508	[PATO:0000001^OBO_REL:inheres_in(UBERON:FBbt_00003154-FMA_7088-MA_0000072-MIAA_0000036-XAO_0000064-ZFA_0000114)]
ZFIN:ZDB-GENE-030219-38	copb1	111	0.0186772	208	0.0934844	32	2.83469	22	4.66498	[PATO:0000169]
ZFIN:ZDB-GENE-010724-7	copb2	111	0.0186772	209	0.0934844	33	2.83469	22	4.66498	[PATO:0000169]
ZFIN:ZDB-GENE-070117-2335	sch	113	0.0186554	212	0.0930233	101	2.41334	22	4.66498	[PATO:0000169]
ZFIN:ZDB-GENE-011026-1	sox32	114	0.0186393	138	0.0984127	160	2.21385	22	4.66498	[PATO:0000169]
ZFIN:ZDB-GENE-040825-1	rnf113a	115	0.0186249	142	0.0978593	196	2.02001	96	3.56508	[PATO:0000001^OBO_REL:inheres_in(UBERON:FBbt_00003154-FMA_7088-MA_0000072-MIAA_0000036-XAO_0000064-ZFA_0000114)]
ZFIN:ZDB-GENE-020123-2	s1pr2	116	0.018463	82	0.100313	71	2.48952	22	4.66498	[PATO:0000169]
ZFIN:ZDB-GENE-000626-1	tnnt2	117	0.0184118	210	0.0932476	161	2.1617	22	4.66498	[PATO:0000169]
ZFIN:ZDB-GENE-070117-88	knu	118	0.018392	77	0.100746	74	2.46779	96	3.56508	[PATO:0000001^OBO_REL:inheres_in(UBERON:FBbt_00003154-FMA_7088-MA_0000072-MIAA_0000036-XAO_0000064-ZFA_0000114)]
ZFIN:ZDB-GENE-030421-3	plcg1	119	0.0183545	147	0.0972644	170	2.0647	96	3.56508	[PATO:0000001^OBO_REL:inheres_in(UBERON:FBbt_00003154-FMA_7088-MA_0000072-MIAA_0000036-XAO_0000064-ZFA_0000114)]
ZFIN:ZDB-GENE-040109-1	nol5a	120	0.0183487	165	0.0963855	234	1.71522	96	3.56508	[PATO:0000001^OBO_REL:inheres_in(UBERON:FBbt_00003154-FMA_7088-MA_0000072-MIAA_0000036-XAO_0000064-ZFA_0000114)]
ZFIN:ZDB-GENE-980526-137	chrna1	121	0.0180008	222	0.0923077	96	2.45541	22	4.66498	[PATO:0000169]
ZFIN:ZDB-GENE-070117-225	unm tf212	122	0.0178319	213	0.0929577	46	2.72179	93	3.85571	[PATO:0000001^OBO_REL:inheres_in(UBERON:FBbt_00005069-FMA_30316-FMA_32558-MA_0000015-MIAA_0000025-WBbt_0005737-XAO_0000172-ZFA_0000548-ZFA_0005145)]
ZFIN:ZDB-GENE-070117-283	unm m203	123	0.017826	164	0.0965517	202	1.9919	96	3.56508	[PATO:0000001^OBO_REL:inheres_in(UBERON:FBbt_00003154-FMA_7088-MA_0000072-MIAA_0000036-XAO_0000064-ZFA_0000114)]
ZFIN:ZDB-GENE-070117-342	unm tg415	124	0.0178214	230	0.0921788	46	2.72179	93	3.85571	[PATO:0000001^OBO_REL:inheres_in(UBERON:FBbt_00005069-FMA_30316-FMA_32558-MA_0000015-MIAA_0000025-WBbt_0005737-XAO_0000172-ZFA_0000548-ZFA_0005145)]
ZFIN:ZDB-GENE-030131-970	rpl7l1	125	0.0177031	87	0.0993377	164	2.09669	96	3.56508	[PATO:0000001^OBO_REL:inheres_in(UBERON:FBbt_00003154-FMA_7088-MA_0000072-MIAA_0000036-XAO_0000064-ZFA_0000114)]
ZFIN:ZDB-GENE-030102-1	flj20272l	125	0.0177031	87	0.0993377	164	2.09669	96	3.56508	[PATO:0000001^OBO_REL:inheres_in(UBERON:FBbt_00003154-FMA_7088-MA_0000072-MIAA_0000036-XAO_0000064-ZFA_0000114)]
ZFIN:ZDB-GENE-020419-7	cct7	125	0.0177031	87	0.0993377	164	2.09669	96	3.56508	[PATO:0000001^OBO_REL:inheres_in(UBERON:FBbt_00003154-FMA_7088-MA_0000072-MIAA_0000036-XAO_0000064-ZFA_0000114)]
ZFIN:ZDB-GENE-020419-6	cct2	125	0.0177031	87	0.0993377	164	2.09669	96	3.56508	[PATO:0000001^OBO_REL:inheres_in(UBERON:FBbt_00003154-FMA_7088-MA_0000072-MIAA_0000036-XAO_0000064-ZFA_0000114)]
ZFIN:ZDB-GENE-010601-1	vars	125	0.0177031	87	0.0993377	164	2.09669	96	3.56508	[PATO:0000001^OBO_REL:inheres_in(UBERON:FBbt_00003154-FMA_7088-MA_0000072-MIAA_0000036-XAO_0000064-ZFA_0000114)]
ZFIN:ZDB-GENE-030131-2590	clint1	130	0.0175722	180	0.0942249	213	1.91697	96	3.56508	[PATO:0000001^OBO_REL:inheres_in(UBERON:FBbt_00003154-FMA_7088-MA_0000072-MIAA_0000036-XAO_0000064-ZFA_0000114)]
ZFIN:ZDB-GENE-070117-1506	unm t30715	131	0.0175487	65	0.101449	151	2.21569	96	3.56508	[PATO:0000001^OBO_REL:inheres_in(UBERON:FBbt_00003154-FMA_7088-MA_0000072-MIAA_0000036-XAO_0000064-ZFA_0000114)]
ZFIN:ZDB-GENE-070117-1502	unm t30587	131	0.0175487	65	0.101449	151	2.21569	96	3.56508	[PATO:0000001^OBO_REL:inheres_in(UBERON:FBbt_00003154-FMA_7088-MA_0000072-MIAA_0000036-XAO_0000064-ZFA_0000114)]
ZFIN:ZDB-GENE-070117-1447	unm t30645	131	0.0175487	65	0.101449	151	2.21569	96	3.56508	[PATO:0000001^OBO_REL:inheres_in(UBERON:FBbt_00003154-FMA_7088-MA_0000072-MIAA_0000036-XAO_0000064-ZFA_0000114)]
ZFIN:ZDB-GENE-070117-1162	unm t30545	131	0.0175487	65	0.101449	151	2.21569	96	3.56508	[PATO:0000001^OBO_REL:inheres_in(UBERON:FBbt_00003154-FMA_7088-MA_0000072-MIAA_0000036-XAO_0000064-ZFA_0000114)]
ZFIN:ZDB-GENE-070117-1161	unm t30543	131	0.0175487	65	0.101449	151	2.21569	96	3.56508	[PATO:0000001^OBO_REL:inheres_in(UBERON:FBbt_00003154-FMA_7088-MA_0000072-MIAA_0000036-XAO_0000064-ZFA_0000114)]
ZFIN:ZDB-GENE-070117-1133	unm t30546	131	0.0175487	65	0.101449	151	2.21569	96	3.56508	[PATO:0000001^OBO_REL:inheres_in(UBERON:FBbt_00003154-FMA_7088-MA_0000072-MIAA_0000036-XAO_0000064-ZFA_0000114)]
ZFIN:ZDB-GENE-070117-1125	unm t30351	131	0.0175487	65	0.101449	151	2.21569	96	3.56508	[PATO:0000001^OBO_REL:inheres_in(UBERON:FBbt_00003154-FMA_7088-MA_0000072-MIAA_0000036-XAO_0000064-ZFA_0000114)]
ZFIN:ZDB-GENE-070117-1106	unm t30350	131	0.0175487	65	0.101449	151	2.21569	96	3.56508	[PATO:0000001^OBO_REL:inheres_in(UBERON:FBbt_00003154-FMA_7088-MA_0000072-MIAA_0000036-XAO_0000064-ZFA_0000114)]
ZFIN:ZDB-GENE-070117-1105	unm t30349	131	0.0175487	65	0.101449	151	2.21569	96	3.56508	[PATO:0000001^OBO_REL:inheres_in(UBERON:FBbt_00003154-FMA_7088-MA_0000072-MIAA_0000036-XAO_0000064-ZFA_0000114)]
ZFIN:ZDB-GENE-030616-450	epb41l5	140	0.0174739	55	0.104651	229	1.7714	96	3.56508	[PATO:0000001^OBO_REL:inheres_in(UBERON:FBbt_00003154-FMA_7088-MA_0000072-MIAA_0000036-XAO_0000064-ZFA_0000114)]
ZFIN:ZDB-GENE-040927-28	ddx51	141	0.0173188	149	0.0967742	197	2.01898	96	3.56508	[PATO:0000001^OBO_REL:inheres_in(UBERON:FBbt_00003154-FMA_7088-MA_0000072-MIAA_0000036-XAO_0000064-ZFA_0000114)]
ZFIN:ZDB-GENE-040801-236	suds3	141	0.0173188	149	0.0967742	197	2.01898	96	3.56508	[PATO:0000001^OBO_REL:inheres_in(UBERON:FBbt_00003154-FMA_7088-MA_0000072-MIAA_0000036-XAO_0000064-ZFA_0000114)]
ZFIN:ZDB-GENE-030131-1736	exosc8	141	0.0173188	149	0.0967742	197	2.01898	96	3.56508	[PATO:0000001^OBO_REL:inheres_in(UBERON:FBbt_00003154-FMA_7088-MA_0000072-MIAA_0000036-XAO_0000064-ZFA_0000114)]
ZFIN:ZDB-GENE-030131-5566	kiaa0947l	144	0.0172661	223	0.092219	163	2.12083	96	3.56508	[PATO:0000001^OBO_REL:inheres_in(UBERON:FBbt_00003154-FMA_7088-MA_0000072-MIAA_0000036-XAO_0000064-ZFA_0000114)]
ZFIN:ZDB-GENE-040915-1	cnot1	145	0.0172513	160	0.0965732	218	1.87379	96	3.56508	[PATO:0000001^OBO_REL:inheres_in(UBERON:FBbt_00003154-FMA_7088-MA_0000072-MIAA_0000036-XAO_0000064-ZFA_0000114)]
ZFIN:ZDB-GENE-040618-2	psmb1	145	0.0172513	160	0.0965732	218	1.87379	96	3.56508	[PATO:0000001^OBO_REL:inheres_in(UBERON:FBbt_00003154-FMA_7088-MA_0000072-MIAA_0000036-XAO_0000064-ZFA_0000114)]
ZFIN:ZDB-GENE-030616-54	thoc2	145	0.0172513	160	0.0965732	218	1.87379	96	3.56508	[PATO:0000001^OBO_REL:inheres_in(UBERON:FBbt_00003154-FMA_7088-MA_0000072-MIAA_0000036-XAO_0000064-ZFA_0000114)]
ZFIN:ZDB-GENE-030411-2	seph	145	0.0172513	160	0.0965732	218	1.87379	96	3.56508	[PATO:0000001^OBO_REL:inheres_in(UBERON:FBbt_00003154-FMA_7088-MA_0000072-MIAA_0000036-XAO_0000064-ZFA_0000114)]
ZFIN:ZDB-GENE-030131-215	cfl1	149	0.0172283	149	0.0967742	239	1.6693	96	3.56508	[PATO:0000001^OBO_REL:inheres_in(UBERON:FBbt_00003154-FMA_7088-MA_0000072-MIAA_0000036-XAO_0000064-ZFA_0000114)]
ZFIN:ZDB-GENE-070117-2092	gon	150	0.0171849	63	0.101695	240	1.61793	96	3.56508	[PATO:0000001^OBO_REL:inheres_in(UBERON:FBbt_00003154-FMA_7088-MA_0000072-MIAA_0000036-XAO_0000064-ZFA_0000114)]
ZFIN:ZDB-GENE-030131-667	ddx46	151	0.0171529	168	0.0958466	225	1.84836	96	3.56508	[PATO:0000001^OBO_REL:inheres_in(UBERON:FBbt_00003154-FMA_7088-MA_0000072-MIAA_0000036-XAO_0000064-ZFA_0000114)]
ZFIN:ZDB-GENE-040831-4	gle1l	152	0.0171314	169	0.095679	218	1.87379	96	3.56508	[PATO:0000001^OBO_REL:inheres_in(UBERON:FBbt_00003154-FMA_7088-MA_0000072-MIAA_0000036-XAO_0000064-ZFA_0000114)]
ZFIN:ZDB-GENE-040823-3	prpf3	152	0.0171314	169	0.095679	218	1.87379	96	3.56508	[PATO:0000001^OBO_REL:inheres_in(UBERON:FBbt_00003154-FMA_7088-MA_0000072-MIAA_0000036-XAO_0000064-ZFA_0000114)]
ZFIN:ZDB-GENE-030131-2492	sf1	154	0.0170478	172	0.0953846	227	1.81479	96	3.56508	[PATO:0000001^OBO_REL:inheres_in(UBERON:FBbt_00003154-FMA_7088-MA_0000072-MIAA_0000036-XAO_0000064-ZFA_0000114)]
ZFIN:ZDB-GENE-040824-2	clasp1	155	0.0169828	214	0.0926518	228	1.79787	96	3.56508	[PATO:0000001^OBO_REL:inheres_in(UBERON:FBbt_00003154-FMA_7088-MA_0000072-MIAA_0000036-XAO_0000064-ZFA_0000114)]
ZFIN:ZDB-GENE-040426-1707	skp1	156	0.0169661	173	0.095092	236	1.70748	96	3.56508	[PATO:0000001^OBO_REL:inheres_in(UBERON:FBbt_00003154-FMA_7088-MA_0000072-MIAA_0000036-XAO_0000064-ZFA_0000114)]
ZFIN:ZDB-GENE-050909-1	crfb5	157	0.0169125	183	0.0940439	175	2.03008	96	3.56508	[PATO:0000001^OBO_REL:inheres_in(UBERON:FBbt_00003154-FMA_7088-MA_0000072-MIAA_0000036-XAO_0000064-ZFA_0000114)]
ZFIN:ZDB-GENE-050522-437	ndufs5	157	0.0169125	183	0.0940439	175	2.03008	96	3.56508	[PATO:0000001^OBO_REL:inheres_in(UBERON:FBbt_00003154-FMA_7088-MA_0000072-MIAA_0000036-XAO_0000064-ZFA_0000114)]
ZFIN:ZDB-GENE-041007-4	nola3	157	0.0169125	183	0.0940439	175	2.03008	96	3.56508	[PATO:0000001^OBO_REL:inheres_in(UBERON:FBbt_00003154-FMA_7088-MA_0000072-MIAA_0000036-XAO_0000064-ZFA_0000114)]
ZFIN:ZDB-GENE-040930-11	rcl1	157	0.0169125	183	0.0940439	175	2.03008	96	3.56508	[PATO:0000001^OBO_REL:inheres_in(UBERON:FBbt_00003154-FMA_7088-MA_0000072-MIAA_0000036-XAO_0000064-ZFA_0000114)]
ZFIN:ZDB-GENE-040924-3	wdr33	157	0.0169125	183	0.0940439	175	2.03008	96	3.56508	[PATO:0000001^OBO_REL:inheres_in(UBERON:FBbt_00003154-FMA_7088-MA_0000072-MIAA_0000036-XAO_0000064-ZFA_0000114)]
ZFIN:ZDB-GENE-040915-3	kri1l	157	0.0169125	183	0.0940439	175	2.03008	96	3.56508	[PATO:0000001^OBO_REL:inheres_in(UBERON:FBbt_00003154-FMA_7088-MA_0000072-MIAA_0000036-XAO_0000064-ZFA_0000114)]
ZFIN:ZDB-GENE-040712-1	ltv1	157	0.0169125	183	0.0940439	175	2.03008	96	3.56508	[PATO:0000001^OBO_REL:inheres_in(UBERON:FBbt_00003154-FMA_7088-MA_0000072-MIAA_0000036-XAO_0000064-ZFA_0000114)]
ZFIN:ZDB-GENE-040426-1995	abce1	157	0.0169125	183	0.0940439	175	2.03008	96	3.56508	[PATO:0000001^OBO_REL:inheres_in(UBERON:FBbt_00003154-FMA_7088-MA_0000072-MIAA_0000036-XAO_0000064-ZFA_0000114)]
ZFIN:ZDB-GENE-040426-1495	polr1c	157	0.0169125	183	0.0940439	175	2.03008	96	3.56508	[PATO:0000001^OBO_REL:inheres_in(UBERON:FBbt_00003154-FMA_7088-MA_0000072-MIAA_0000036-XAO_0000064-ZFA_0000114)]
ZFIN:ZDB-GENE-040426-1029	rae1	157	0.0169125	183	0.0940439	175	2.03008	96	3.56508	[PATO:0000001^OBO_REL:inheres_in(UBERON:FBbt_00003154-FMA_7088-MA_0000072-MIAA_0000036-XAO_0000064-ZFA_0000114)]
ZFIN:ZDB-GENE-040426-1011	qars	157	0.0169125	183	0.0940439	175	2.03008	96	3.56508	[PATO:0000001^OBO_REL:inheres_in(UBERON:FBbt_00003154-FMA_7088-MA_0000072-MIAA_0000036-XAO_0000064-ZFA_0000114)]
ZFIN:ZDB-GENE-031030-2	eif4a1a	157	0.0169125	183	0.0940439	175	2.03008	96	3.56508	[PATO:0000001^OBO_REL:inheres_in(UBERON:FBbt_00003154-FMA_7088-MA_0000072-MIAA_0000036-XAO_0000064-ZFA_0000114)]
ZFIN:ZDB-GENE-030828-12	hspa9	157	0.0169125	183	0.0940439	175	2.03008	96	3.56508	[PATO:0000001^OBO_REL:inheres_in(UBERON:FBbt_00003154-FMA_7088-MA_0000072-MIAA_0000036-XAO_0000064-ZFA_0000114)]
ZFIN:ZDB-GENE-030131-8522	si:ch211-114c12.2	157	0.0169125	183	0.0940439	175	2.03008	96	3.56508	[PATO:0000001^OBO_REL:inheres_in(UBERON:FBbt_00003154-FMA_7088-MA_0000072-MIAA_0000036-XAO_0000064-ZFA_0000114)]
ZFIN:ZDB-GENE-030131-616	gnl3	157	0.0169125	183	0.0940439	175	2.03008	96	3.56508	[PATO:0000001^OBO_REL:inheres_in(UBERON:FBbt_00003154-FMA_7088-MA_0000072-MIAA_0000036-XAO_0000064-ZFA_0000114)]
ZFIN:ZDB-GENE-030131-3275	cpsf3	157	0.0169125	183	0.0940439	175	2.03008	96	3.56508	[PATO:0000001^OBO_REL:inheres_in(UBERON:FBbt_00003154-FMA_7088-MA_0000072-MIAA_0000036-XAO_0000064-ZFA_0000114)]
ZFIN:ZDB-GENE-030131-3207	taf2	157	0.0169125	183	0.0940439	175	2.03008	96	3.56508	[PATO:0000001^OBO_REL:inheres_in(UBERON:FBbt_00003154-FMA_7088-MA_0000072-MIAA_0000036-XAO_0000064-ZFA_0000114)]
ZFIN:ZDB-GENE-030102-2	zcchc7l	157	0.0169125	183	0.0940439	175	2.03008	96	3.56508	[PATO:0000001^OBO_REL:inheres_in(UBERON:FBbt_00003154-FMA_7088-MA_0000072-MIAA_0000036-XAO_0000064-ZFA_0000114)]
ZFIN:ZDB-GENE-021231-2	dt1p1a10l	157	0.0169125	183	0.0940439	175	2.03008	96	3.56508	[PATO:0000001^OBO_REL:inheres_in(UBERON:FBbt_00003154-FMA_7088-MA_0000072-MIAA_0000036-XAO_0000064-ZFA_0000114)]
ZFIN:ZDB-GENE-021213-1	sdad1	157	0.0169125	183	0.0940439	175	2.03008	96	3.56508	[PATO:0000001^OBO_REL:inheres_in(UBERON:FBbt_00003154-FMA_7088-MA_0000072-MIAA_0000036-XAO_0000064-ZFA_0000114)]
ZFIN:ZDB-GENE-021115-8	kars	157	0.0169125	183	0.0940439	175	2.03008	96	3.56508	[PATO:0000001^OBO_REL:inheres_in(UBERON:FBbt_00003154-FMA_7088-MA_0000072-MIAA_0000036-XAO_0000064-ZFA_0000114)]
ZFIN:ZDB-GENE-070117-563	unm m272	178	0.016881	141	0.0981013	242	1.49989	96	3.56508	[PATO:0000001^OBO_REL:inheres_in(UBERON:FBbt_00003154-FMA_7088-MA_0000072-MIAA_0000036-XAO_0000064-ZFA_0000114)]
ZFIN:ZDB-GENE-020712-1	mpp5a	179	0.0168739	237	0.0915332	214	1.91299	96	3.56508	[PATO:0000001^OBO_REL:inheres_in(UBERON:FBbt_00003154-FMA_7088-MA_0000072-MIAA_0000036-XAO_0000064-ZFA_0000114)]
ZFIN:ZDB-GENE-030131-977	cct5	180	0.0168501	180	0.0942249	236	1.70748	96	3.56508	[PATO:0000001^OBO_REL:inheres_in(UBERON:FBbt_00003154-FMA_7088-MA_0000072-MIAA_0000036-XAO_0000064-ZFA_0000114)]
ZFIN:ZDB-GENE-050320-149	nmd3	181	0.0167543	211	0.0931677	216	1.8794	96	3.56508	[PATO:0000001^OBO_REL:inheres_in(UBERON:FBbt_00003154-FMA_7088-MA_0000072-MIAA_0000036-XAO_0000064-ZFA_0000114)]
ZFIN:ZDB-GENE-030131-6349	nolc1l	181	0.0167543	211	0.0931677	216	1.8794	96	3.56508	[PATO:0000001^OBO_REL:inheres_in(UBERON:FBbt_00003154-FMA_7088-MA_0000072-MIAA_0000036-XAO_0000064-ZFA_0000114)]
ZFIN:ZDB-GENE-021030-4	cad	183	0.0166317	216	0.0925926	226	1.82345	96	3.56508	[PATO:0000001^OBO_REL:inheres_in(UBERON:FBbt_00003154-FMA_7088-MA_0000072-MIAA_0000036-XAO_0000064-ZFA_0000114)]
ZFIN:ZDB-GENE-031001-8	ddx27	184	0.0166189	235	0.0917431	224	1.8522	96	3.56508	[PATO:0000001^OBO_REL:inheres_in(UBERON:FBbt_00003154-FMA_7088-MA_0000072-MIAA_0000036-XAO_0000064-ZFA_0000114)]
ZFIN:ZDB-GENE-070117-996	unm t30873	185	0.0166077	95	0.0988593	109	2.2873	96	3.56508	[PATO:0000001^OBO_REL:inheres_in(UBERON:FBbt_00003154-FMA_7088-MA_0000072-MIAA_0000036-XAO_0000064-ZFA_0000114)]
ZFIN:ZDB-GENE-070117-985	unm t30872	185	0.0166077	95	0.0988593	109	2.2873	96	3.56508	[PATO:0000001^OBO_REL:inheres_in(UBERON:FBbt_00003154-FMA_7088-MA_0000072-MIAA_0000036-XAO_0000064-ZFA_0000114)]
ZFIN:ZDB-GENE-070117-974	unm t30843	185	0.0166077	95	0.0988593	109	2.2873	96	3.56508	[PATO:0000001^OBO_REL:inheres_in(UBERON:FBbt_00003154-FMA_7088-MA_0000072-MIAA_0000036-XAO_0000064-ZFA_0000114)]
ZFIN:ZDB-GENE-070117-963	unm t30841	185	0.0166077	95	0.0988593	109	2.2873	96	3.56508	[PATO:0000001^OBO_REL:inheres_in(UBERON:FBbt_00003154-FMA_7088-MA_0000072-MIAA_0000036-XAO_0000064-ZFA_0000114)]
ZFIN:ZDB-GENE-070117-952	unm t30840	185	0.0166077	95	0.0988593	109	2.2873	96	3.56508	[PATO:0000001^OBO_REL:inheres_in(UBERON:FBbt_00003154-FMA_7088-MA_0000072-MIAA_0000036-XAO_0000064-ZFA_0000114)]
ZFIN:ZDB-GENE-070117-941	unm t30809	185	0.0166077	95	0.0988593	109	2.2873	96	3.56508	[PATO:0000001^OBO_REL:inheres_in(UBERON:FBbt_00003154-FMA_7088-MA_0000072-MIAA_0000036-XAO_0000064-ZFA_0000114)]
ZFIN:ZDB-GENE-070117-940	unm t30975	185	0.0166077	95	0.0988593	109	2.2873	96	3.56508	[PATO:0000001^OBO_REL:inheres_in(UBERON:FBbt_00003154-FMA_7088-MA_0000072-MIAA_0000036-XAO_0000064-ZFA_0000114)]
ZFIN:ZDB-GENE-070117-939	unm t30974	185	0.0166077	95	0.0988593	109	2.2873	96	3.56508	[PATO:0000001^OBO_REL:inheres_in(UBERON:FBbt_00003154-FMA_7088-MA_0000072-MIAA_0000036-XAO_0000064-ZFA_0000114)]
ZFIN:ZDB-GENE-070117-938	unm t30796	185	0.0166077	95	0.0988593	109	2.2873	96	3.56508	[PATO:0000001^OBO_REL:inheres_in(UBERON:FBbt_00003154-FMA_7088-MA_0000072-MIAA_0000036-XAO_0000064-ZFA_0000114)]
ZFIN:ZDB-GENE-070117-934	unm t30976	185	0.0166077	95	0.0988593	109	2.2873	96	3.56508	[PATO:0000001^OBO_REL:inheres_in(UBERON:FBbt_00003154-FMA_7088-MA_0000072-MIAA_0000036-XAO_0000064-ZFA_0000114)]
ZFIN:ZDB-GENE-070117-930	unm t30808	185	0.0166077	95	0.0988593	109	2.2873	96	3.56508	[PATO:0000001^OBO_REL:inheres_in(UBERON:FBbt_00003154-FMA_7088-MA_0000072-MIAA_0000036-XAO_0000064-ZFA_0000114)]
ZFIN:ZDB-GENE-070117-921	unm t30973	185	0.0166077	95	0.0988593	109	2.2873	96	3.56508	[PATO:0000001^OBO_REL:inheres_in(UBERON:FBbt_00003154-FMA_7088-MA_0000072-MIAA_0000036-XAO_0000064-ZFA_0000114)]
ZFIN:ZDB-GENE-070117-919	unm t30807	185	0.0166077	95	0.0988593	109	2.2873	96	3.56508	[PATO:0000001^OBO_REL:inheres_in(UBERON:FBbt_00003154-FMA_7088-MA_0000072-MIAA_0000036-XAO_0000064-ZFA_0000114)]
ZFIN:ZDB-GENE-070117-908	unm t30804	185	0.0166077	95	0.0988593	109	2.2873	96	3.56508	[PATO:0000001^OBO_REL:inheres_in(UBERON:FBbt_00003154-FMA_7088-MA_0000072-MIAA_0000036-XAO_0000064-ZFA_0000114)]
ZFIN:ZDB-GENE-070117-897	unm t30798	185	0.0166077	95	0.0988593	109	2.2873	96	3.56508	[PATO:0000001^OBO_REL:inheres_in(UBERON:FBbt_00003154-FMA_7088-MA_0000072-MIAA_0000036-XAO_0000064-ZFA_0000114)]
ZFIN:ZDB-GENE-070117-1628	unm t31180	185	0.0166077	95	0.0988593	109	2.2873	96	3.56508	[PATO:0000001^OBO_REL:inheres_in(UBERON:FBbt_00003154-FMA_7088-MA_0000072-MIAA_0000036-XAO_0000064-ZFA_0000114)]
ZFIN:ZDB-GENE-070117-1627	unm t31173	185	0.0166077	95	0.0988593	109	2.2873	96	3.56508	[PATO:0000001^OBO_REL:inheres_in(UBERON:FBbt_00003154-FMA_7088-MA_0000072-MIAA_0000036-XAO_0000064-ZFA_0000114)]
ZFIN:ZDB-GENE-070117-1626	unm t31171	185	0.0166077	95	0.0988593	109	2.2873	96	3.56508	[PATO:0000001^OBO_REL:inheres_in(UBERON:FBbt_00003154-FMA_7088-MA_0000072-MIAA_0000036-XAO_0000064-ZFA_0000114)]
ZFIN:ZDB-GENE-070117-1625	unm t31134	185	0.0166077	95	0.0988593	109	2.2873	96	3.56508	[PATO:0000001^OBO_REL:inheres_in(UBERON:FBbt_00003154-FMA_7088-MA_0000072-MIAA_0000036-XAO_0000064-ZFA_0000114)]
ZFIN:ZDB-GENE-070117-1624	unm t31131	185	0.0166077	95	0.0988593	109	2.2873	96	3.56508	[PATO:0000001^OBO_REL:inheres_in(UBERON:FBbt_00003154-FMA_7088-MA_0000072-MIAA_0000036-XAO_0000064-ZFA_0000114)]
ZFIN:ZDB-GENE-070117-1623	unm t31130	185	0.0166077	95	0.0988593	109	2.2873	96	3.56508	[PATO:0000001^OBO_REL:inheres_in(UBERON:FBbt_00003154-FMA_7088-MA_0000072-MIAA_0000036-XAO_0000064-ZFA_0000114)]
ZFIN:ZDB-GENE-070117-1541	unm t30794	185	0.0166077	95	0.0988593	109	2.2873	96	3.56508	[PATO:0000001^OBO_REL:inheres_in(UBERON:FBbt_00003154-FMA_7088-MA_0000072-MIAA_0000036-XAO_0000064-ZFA_0000114)]
ZFIN:ZDB-GENE-070117-1484	unm t30803	185	0.0166077	95	0.0988593	109	2.2873	96	3.56508	[PATO:0000001^OBO_REL:inheres_in(UBERON:FBbt_00003154-FMA_7088-MA_0000072-MIAA_0000036-XAO_0000064-ZFA_0000114)]
ZFIN:ZDB-GENE-070117-1482	unm t30881	185	0.0166077	95	0.0988593	109	2.2873	96	3.56508	[PATO:0000001^OBO_REL:inheres_in(UBERON:FBbt_00003154-FMA_7088-MA_0000072-MIAA_0000036-XAO_0000064-ZFA_0000114)]
ZFIN:ZDB-GENE-070117-1481	unm t30797	185	0.0166077	95	0.0988593	109	2.2873	96	3.56508	[PATO:0000001^OBO_REL:inheres_in(UBERON:FBbt_00003154-FMA_7088-MA_0000072-MIAA_0000036-XAO_0000064-ZFA_0000114)]
ZFIN:ZDB-GENE-070117-1480	unm t30977	185	0.0166077	95	0.0988593	109	2.2873	96	3.56508	[PATO:0000001^OBO_REL:inheres_in(UBERON:FBbt_00003154-FMA_7088-MA_0000072-MIAA_0000036-XAO_0000064-ZFA_0000114)]
ZFIN:ZDB-GENE-070117-1479	unm t30970	185	0.0166077	95	0.0988593	109	2.2873	96	3.56508	[PATO:0000001^OBO_REL:inheres_in(UBERON:FBbt_00003154-FMA_7088-MA_0000072-MIAA_0000036-XAO_0000064-ZFA_0000114)]
ZFIN:ZDB-GENE-070117-1478	unm t30842	185	0.0166077	95	0.0988593	109	2.2873	96	3.56508	[PATO:0000001^OBO_REL:inheres_in(UBERON:FBbt_00003154-FMA_7088-MA_0000072-MIAA_0000036-XAO_0000064-ZFA_0000114)]
ZFIN:ZDB-GENE-070117-1241	unm t30971	185	0.0166077	95	0.0988593	109	2.2873	96	3.56508	[PATO:0000001^OBO_REL:inheres_in(UBERON:FBbt_00003154-FMA_7088-MA_0000072-MIAA_0000036-XAO_0000064-ZFA_0000114)]
ZFIN:ZDB-GENE-070117-1119	unm t30972	185	0.0166077	95	0.0988593	109	2.2873	96	3.56508	[PATO:0000001^OBO_REL:inheres_in(UBERON:FBbt_00003154-FMA_7088-MA_0000072-MIAA_0000036-XAO_0000064-ZFA_0000114)]
ZFIN:ZDB-GENE-070117-1107	unm t30969	185	0.0166077	95	0.0988593	109	2.2873	96	3.56508	[PATO:0000001^OBO_REL:inheres_in(UBERON:FBbt_00003154-FMA_7088-MA_0000072-MIAA_0000036-XAO_0000064-ZFA_0000114)]
ZFIN:ZDB-GENE-070117-1096	unm t30898	185	0.0166077	95	0.0988593	109	2.2873	96	3.56508	[PATO:0000001^OBO_REL:inheres_in(UBERON:FBbt_00003154-FMA_7088-MA_0000072-MIAA_0000036-XAO_0000064-ZFA_0000114)]
ZFIN:ZDB-GENE-070117-1085	unm t30897	185	0.0166077	95	0.0988593	109	2.2873	96	3.56508	[PATO:0000001^OBO_REL:inheres_in(UBERON:FBbt_00003154-FMA_7088-MA_0000072-MIAA_0000036-XAO_0000064-ZFA_0000114)]
ZFIN:ZDB-GENE-070117-1074	unm t30880	185	0.0166077	95	0.0988593	109	2.2873	96	3.56508	[PATO:0000001^OBO_REL:inheres_in(UBERON:FBbt_00003154-FMA_7088-MA_0000072-MIAA_0000036-XAO_0000064-ZFA_0000114)]
ZFIN:ZDB-GENE-070117-1063	unm t30879	185	0.0166077	95	0.0988593	109	2.2873	96	3.56508	[PATO:0000001^OBO_REL:inheres_in(UBERON:FBbt_00003154-FMA_7088-MA_0000072-MIAA_0000036-XAO_0000064-ZFA_0000114)]
ZFIN:ZDB-GENE-070117-1052	unm t30878	185	0.0166077	95	0.0988593	109	2.2873	96	3.56508	[PATO:0000001^OBO_REL:inheres_in(UBERON:FBbt_00003154-FMA_7088-MA_0000072-MIAA_0000036-XAO_0000064-ZFA_0000114)]
ZFIN:ZDB-GENE-070117-1041	unm t30877	185	0.0166077	95	0.0988593	109	2.2873	96	3.56508	[PATO:0000001^OBO_REL:inheres_in(UBERON:FBbt_00003154-FMA_7088-MA_0000072-MIAA_0000036-XAO_0000064-ZFA_0000114)]
ZFIN:ZDB-GENE-070117-1030	unm t30876	185	0.0166077	95	0.0988593	109	2.2873	96	3.56508	[PATO:0000001^OBO_REL:inheres_in(UBERON:FBbt_00003154-FMA_7088-MA_0000072-MIAA_0000036-XAO_0000064-ZFA_0000114)]
ZFIN:ZDB-GENE-070117-1020	unm t30795	185	0.0166077	95	0.0988593	109	2.2873	96	3.56508	[PATO:0000001^OBO_REL:inheres_in(UBERON:FBbt_00003154-FMA_7088-MA_0000072-MIAA_0000036-XAO_0000064-ZFA_0000114)]
ZFIN:ZDB-GENE-070117-1019	unm t30875	185	0.0166077	95	0.0988593	109	2.2873	96	3.56508	[PATO:0000001^OBO_REL:inheres_in(UBERON:FBbt_00003154-FMA_7088-MA_0000072-MIAA_0000036-XAO_0000064-ZFA_0000114)]
ZFIN:ZDB-GENE-070117-1008	unm t30874	185	0.0166077	95	0.0988593	109	2.2873	96	3.56508	[PATO:0000001^OBO_REL:inheres_in(UBERON:FBbt_00003154-FMA_7088-MA_0000072-MIAA_0000036-XAO_0000064-ZFA_0000114)]
ZFIN:ZDB-GENE-070117-1565	dri	226	0.0164701	242	0.0911854	238	1.6932	96	3.56508	[PATO:0000001^OBO_REL:inheres_in(UBERON:FBbt_00003154-FMA_7088-MA_0000072-MIAA_0000036-XAO_0000064-ZFA_0000114)]
ZFIN:ZDB-GENE-040426-972	polr3f	227	0.0164568	238	0.0914634	210	1.92113	96	3.56508	[PATO:0000001^OBO_REL:inheres_in(UBERON:FBbt_00003154-FMA_7088-MA_0000072-MIAA_0000036-XAO_0000064-ZFA_0000114)]
ZFIN:ZDB-GENE-030131-2165	nfyc	228	0.0164568	239	0.0914634	210	1.92113	96	3.56508	[PATO:0000001^OBO_REL:inheres_in(UBERON:FBbt_00003154-FMA_7088-MA_0000072-MIAA_0000036-XAO_0000064-ZFA_0000114)]
ZFIN:ZDB-GENE-070117-2476	yyo	229	0.0163916	243	0.0909091	204	1.96129	96	3.56508	[PATO:0000001^OBO_REL:inheres_in(UBERON:FBbt_00003154-FMA_7088-MA_0000072-MIAA_0000036-XAO_0000064-ZFA_0000114)]
ZFIN:ZDB-GENE-070117-134	unm m558	230	0.0162701	236	0.0915751	233	1.72916	96	3.56508	[PATO:0000001^OBO_REL:inheres_in(UBERON:FBbt_00003154-FMA_7088-MA_0000072-MIAA_0000036-XAO_0000064-ZFA_0000114)]
ZFIN:ZDB-GENE-070117-282	unm m154	231	0.0162013	227	0.0921986	232	1.73205	96	3.56508	[PATO:0000001^OBO_REL:inheres_in(UBERON:FBbt_00003154-FMA_7088-MA_0000072-MIAA_0000036-XAO_0000064-ZFA_0000114)]
ZFIN:ZDB-GENE-070117-627	unm tm96	232	0.0161821	243	0.0909091	204	1.96129	96	3.56508	[PATO:0000001^OBO_REL:inheres_in(UBERON:FBbt_00003154-FMA_7088-MA_0000072-MIAA_0000036-XAO_0000064-ZFA_0000114)]
ZFIN:ZDB-GENE-070117-577	unm tw212e	232	0.0161821	243	0.0909091	204	1.96129	96	3.56508	[PATO:0000001^OBO_REL:inheres_in(UBERON:FBbt_00003154-FMA_7088-MA_0000072-MIAA_0000036-XAO_0000064-ZFA_0000114)]
ZFIN:ZDB-GENE-070117-468	unm tr206d	232	0.0161821	243	0.0909091	204	1.96129	96	3.56508	[PATO:0000001^OBO_REL:inheres_in(UBERON:FBbt_00003154-FMA_7088-MA_0000072-MIAA_0000036-XAO_0000064-ZFA_0000114)]
ZFIN:ZDB-GENE-070117-436	unm ts206	232	0.0161821	243	0.0909091	204	1.96129	96	3.56508	[PATO:0000001^OBO_REL:inheres_in(UBERON:FBbt_00003154-FMA_7088-MA_0000072-MIAA_0000036-XAO_0000064-ZFA_0000114)]
ZFIN:ZDB-GENE-070117-385	unm m27	232	0.0161821	243	0.0909091	204	1.96129	96	3.56508	[PATO:0000001^OBO_REL:inheres_in(UBERON:FBbt_00003154-FMA_7088-MA_0000072-MIAA_0000036-XAO_0000064-ZFA_0000114)]
ZFIN:ZDB-GENE-030131-9102	col1a1	237	0.0161734	182	0.0940767	108	2.30612	238	3.18976	[PATO:0000052]
ZFIN:ZDB-GENE-070117-551	unm m334	238	0.0154337	243	0.0909091	241	1.61744	96	3.56508	[PATO:0000001^OBO_REL:inheres_in(UBERON:FBbt_00003154-FMA_7088-MA_0000072-MIAA_0000036-XAO_0000064-ZFA_0000114)]
ZFIN:ZDB-GENE-070117-63	bll	239	0.0150891	227	0.0921986	173	2.04563	238	3.18976	[PATO:0000052]
ZFIN:ZDB-GENE-070117-62	anc	240	0.0150891	227	0.0921986	173	2.04563	238	3.18976	[PATO:0000052]
ZFIN:ZDB-GENE-070117-83	exb	241	0.0149363	241	0.0912281	203	1.98632	238	3.18976	[PATO:0000052]
ZFIN:ZDB-GENE-070117-1022	unm t30222	242	0.0146199	174	0.0950704	235	1.71518	243	2.81266	[UBERON:FMA_7565-MA_0000032]
ZFIN:ZDB-GENE-070117-2413	sri(l)	243	0.0141902	214	0.0927318	243	1.48889	238	3.18976	[PATO:0000052]
ZFIN:ZDB-GENE-070117-1021	unm t30566	244	0.0141312	54	0.105802	244	1.32995	244	2.71	[PATO:0000586]
ZFIN:ZDB-GENE-070117-1375	unm t30650	245	0.0122253	87	0.0993377	246	0.984938	245	2.26462	[UBERON:FMA_85006-MA_0002447-ZFA_0001438]
ZFIN:ZDB-GENE-070117-1373	unm t30649	245	0.0122253	87	0.0993377	246	0.984938	245	2.26462	[UBERON:FMA_85006-MA_0002447-ZFA_0001438]
ZFIN:ZDB-GENE-070117-1206	unm t30471	247	0.0116045	234	0.0919118	245	1.12374	245	2.26462	[UBERON:FMA_85006-MA_0002447-ZFA_0001438]
ZFIN:ZDB-GENE-070117-1487	unm t30487	248	0.0113499	231	0.0921502	246	0.984938	245	2.26462	[UBERON:FMA_85006-MA_0002447-ZFA_0001438]
ZFIN:ZDB-GENE-070117-1477	unm t30582	248	0.0113499	231	0.0921502	246	0.984938	245	2.26462	[UBERON:FMA_85006-MA_0002447-ZFA_0001438]
ZFIN:ZDB-GENE-070117-1135	unm t30581	248	0.0113499	231	0.0921502	246	0.984938	245	2.26462	[UBERON:FMA_85006-MA_0002447-ZFA_0001438]
