# Supplementary material for: Linking Human Diseases to Animal Models Using Ontology-Based Phenotype Annotation
Source: PLoS Biol. 2009 Nov 24;7(11):e1000247. doi: 10.1371/journal.pbio.1000247 (PMC2774506; doi:10.1371/journal.pbio.1000247)
Supplement: Table S14 — Comparison between human EPB41 and mouse genes. The top 250 genes (by simJ) are reported, together with the rank and score for each metric (simIC, simJ, avgICCS, and maxIC). Additionally, the maxIC phenotype is reported using ontology identifiers. See Materials and Methods for a list of ontology prefixes. Known sequence orthologs are highlighted in yellow and listed in Table 6, if present. Genes at rank 1 are listed in Table 7. (0.08 MB XLS) [file pbio.1000247.s014.xls]

## Sheet: NCBI_Gene_2035-vs-allg-allscore
MGI gene id	mgi gene name	simGIC rank	simGIC	simJ rank	simJ	avgICCS rank	avgICCS	maxIC rank	maxIC	maxIC phenotype
MGI:99670	Epb4.9	1	0.0983662	4	0.201238	2	5.35866	1	10.4118	[PATO:0001865^OBO_REL:inheres_in(UBERON:CL_0000232-CL_0000562-FMA_62845-ZFA_0009256)]
MGI:95402	Epb4.2	2	0.0965433	21	0.192037	3	5.13843	1	10.4118	[PATO:0001865^OBO_REL:inheres_in(UBERON:CL_0000232-CL_0000562-FMA_62845-ZFA_0009256)]
MGI:95401	Epb4.1	3	0.0901861	6	0.196532	1	5.38589	1	10.4118	[PATO:0001865^OBO_REL:inheres_in(UBERON:CL_0000232-CL_0000562-FMA_62845-ZFA_0009256)]
MGI:1858512	Mnek1a	4	0.0825674	1	0.214511	4	4.74359	10	6.70033	[PATO:0000419^OBO_REL:inheres_in(UBERON:CL_0000232-CL_0000562-FMA_62845-ZFA_0009256), PATO:0001997^OBO_REL:inheres_in(UBERON:CL_0000232-CL_0000562-FMA_62845-ZFA_0009256)]
MGI:107576	Sipa1	5	0.0820177	19	0.193122	25	4.11928	10	6.70033	[PATO:0000419^OBO_REL:inheres_in(UBERON:CL_0000232-CL_0000562-FMA_62845-ZFA_0009256), PATO:0001997^OBO_REL:inheres_in(UBERON:CL_0000232-CL_0000562-FMA_62845-ZFA_0009256)]
MGI:1927072	Ppp1r15a	6	0.0814821	18	0.193717	24	4.15138	10	6.70033	[PATO:0000419^OBO_REL:inheres_in(UBERON:CL_0000232-CL_0000562-FMA_62845-ZFA_0009256), PATO:0001997^OBO_REL:inheres_in(UBERON:CL_0000232-CL_0000562-FMA_62845-ZFA_0009256)]
MGI:98821	Trf	7	0.0810641	86	0.16624	29	3.93389	1	10.4118	[PATO:0001865^OBO_REL:inheres_in(UBERON:CL_0000232-CL_0000562-FMA_62845-ZFA_0009256)]
MGI:1858511	Mnek1b	8	0.0776585	2	0.205993	6	4.66529	10	6.70033	[PATO:0000419^OBO_REL:inheres_in(UBERON:CL_0000232-CL_0000562-FMA_62845-ZFA_0009256), PATO:0001997^OBO_REL:inheres_in(UBERON:CL_0000232-CL_0000562-FMA_62845-ZFA_0009256)]
MGI:98813	Tpo	9	0.0755593	24	0.185567	87	3.34316	10	6.70033	[PATO:0000419^OBO_REL:inheres_in(UBERON:CL_0000232-CL_0000562-FMA_62845-ZFA_0009256), PATO:0001997^OBO_REL:inheres_in(UBERON:CL_0000232-CL_0000562-FMA_62845-ZFA_0009256)]
MGI:1922083	Ciapin1	10	0.0736	23	0.185792	81	3.43818	10	6.70033	[PATO:0000419^OBO_REL:inheres_in(UBERON:CL_0000232-CL_0000562-FMA_62845-ZFA_0009256), PATO:0001997^OBO_REL:inheres_in(UBERON:CL_0000232-CL_0000562-FMA_62845-ZFA_0009256)]
MGI:2158492	Eraf	11	0.0722912	48	0.172897	50	3.85702	10	6.70033	[PATO:0000419^OBO_REL:inheres_in(UBERON:CL_0000232-CL_0000562-FMA_62845-ZFA_0009256), PATO:0001997^OBO_REL:inheres_in(UBERON:CL_0000232-CL_0000562-FMA_62845-ZFA_0009256)]
MGI:1342771	Klf1	12	0.0703139	40	0.180556	51	3.83214	10	6.70033	[PATO:0000419^OBO_REL:inheres_in(UBERON:CL_0000232-CL_0000562-FMA_62845-ZFA_0009256), PATO:0001997^OBO_REL:inheres_in(UBERON:CL_0000232-CL_0000562-FMA_62845-ZFA_0009256)]
MGI:109486	Prdx2	13	0.069779	3	0.20339	5	4.71494	56	5.83894	[PATO:0000051^OBO_REL:inheres_in(UBERON:CL_0000232-CL_0000562-FMA_62845-ZFA_0009256)]
MGI:97604	Pklr	14	0.0692457	7	0.194969	26	4.09429	56	5.83894	[PATO:0000051^OBO_REL:inheres_in(UBERON:CL_0000232-CL_0000562-FMA_62845-ZFA_0009256)]
MGI:95554	Fli1	15	0.0676669	167	0.146535	98	3.22404	10	6.70033	[PATO:0000419^OBO_REL:inheres_in(UBERON:CL_0000232-CL_0000562-FMA_62845-ZFA_0009256), PATO:0001997^OBO_REL:inheres_in(UBERON:CL_0000232-CL_0000562-FMA_62845-ZFA_0009256)]
MGI:109258	Mare	16	0.0670517	47	0.173333	73	3.52436	10	6.70033	[PATO:0000419^OBO_REL:inheres_in(UBERON:CL_0000232-CL_0000562-FMA_62845-ZFA_0009256), PATO:0001997^OBO_REL:inheres_in(UBERON:CL_0000232-CL_0000562-FMA_62845-ZFA_0009256)]
MGI:88117	Slc7a1	17	0.0670285	45	0.174699	91	3.30478	10	6.70033	[PATO:0000419^OBO_REL:inheres_in(UBERON:CL_0000232-CL_0000562-FMA_62845-ZFA_0009256), PATO:0001997^OBO_REL:inheres_in(UBERON:CL_0000232-CL_0000562-FMA_62845-ZFA_0009256)]
MGI:102559	Hbb-ar	18	0.0667035	63	0.169231	79	3.47447	10	6.70033	[PATO:0000419^OBO_REL:inheres_in(UBERON:CL_0000232-CL_0000562-FMA_62845-ZFA_0009256), PATO:0001997^OBO_REL:inheres_in(UBERON:CL_0000232-CL_0000562-FMA_62845-ZFA_0009256)]
MGI:1889411	Tnfrsf13b	19	0.0659651	20	0.192308	70	3.56317	65	5.53408	[PATO:0000586^OBO_REL:inheres_in(UBERON:FMA_7196-MA_0000141-MIAA_0000085-XAO_0000328-ZFA_0000436), PATO:0001202^OBO_REL:inheres_in(UBERON:FMA_7196-MA_0000141-MIAA_0000085-XAO_0000328-ZFA_0000436)]
MGI:1349481	Ing1	20	0.0646555	94	0.164251	231	2.3106	65	5.53408	[PATO:0000586^OBO_REL:inheres_in(UBERON:FMA_7196-MA_0000141-MIAA_0000085-XAO_0000328-ZFA_0000436), PATO:0001202^OBO_REL:inheres_in(UBERON:FMA_7196-MA_0000141-MIAA_0000085-XAO_0000328-ZFA_0000436)]
MGI:106621	?	21	0.0644548	91	0.164589	106	3.18666	10	6.70033	[PATO:0000419^OBO_REL:inheres_in(UBERON:CL_0000232-CL_0000562-FMA_62845-ZFA_0009256), PATO:0001997^OBO_REL:inheres_in(UBERON:CL_0000232-CL_0000562-FMA_62845-ZFA_0009256)]
MGI:1351611	Exoc6	22	0.0643906	101	0.159827	82	3.42616	10	6.70033	[PATO:0000419^OBO_REL:inheres_in(UBERON:CL_0000232-CL_0000562-FMA_62845-ZFA_0009256), PATO:0001997^OBO_REL:inheres_in(UBERON:CL_0000232-CL_0000562-FMA_62845-ZFA_0009256)]
MGI:1203737	Lmb2	23	0.0641938	113	0.155606	94	3.27416	65	5.53408	[PATO:0000586^OBO_REL:inheres_in(UBERON:FMA_7196-MA_0000141-MIAA_0000085-XAO_0000328-ZFA_0000436), PATO:0001202^OBO_REL:inheres_in(UBERON:FMA_7196-MA_0000141-MIAA_0000085-XAO_0000328-ZFA_0000436)]
MGI:95408	Epor	24	0.063749	138	0.150424	27	3.98811	10	6.70033	[PATO:0000419^OBO_REL:inheres_in(UBERON:CL_0000232-CL_0000562-FMA_62845-ZFA_0009256), PATO:0001997^OBO_REL:inheres_in(UBERON:CL_0000232-CL_0000562-FMA_62845-ZFA_0009256)]
MGI:109191	Hfe	25	0.0635221	98	0.160839	83	3.42486	10	6.70033	[PATO:0000419^OBO_REL:inheres_in(UBERON:CL_0000232-CL_0000562-FMA_62845-ZFA_0009256), PATO:0001997^OBO_REL:inheres_in(UBERON:CL_0000232-CL_0000562-FMA_62845-ZFA_0009256)]
MGI:1933825	Jam3	26	0.0634578	213	0.140725	109	3.13512	5	8.97887	[GO:0005856]
MGI:109169	Epas1	27	0.0633775	156	0.147638	85	3.36794	10	6.70033	[PATO:0000419^OBO_REL:inheres_in(UBERON:CL_0000232-CL_0000562-FMA_62845-ZFA_0009256), PATO:0001997^OBO_REL:inheres_in(UBERON:CL_0000232-CL_0000562-FMA_62845-ZFA_0009256)]
MGI:97602	Prkcz	28	0.0621615	32	0.184971	88	3.33339	128	4.63047	[PATO:0000051^OBO_REL:inheres_in(UBERON:FMA_7196-MA_0000141-MIAA_0000085-XAO_0000328-ZFA_0000436)]
MGI:1270839	Cacybp	29	0.0616619	49	0.172872	89	3.32121	108	4.98556	[PATO:0000117^OBO_REL:inheres_in(UBERON:FMA_7196-MA_0000141-MIAA_0000085-XAO_0000328-ZFA_0000436)]
MGI:88588	Cyp1a1	30	0.0614545	90	0.164619	160	2.89361	108	4.98556	[PATO:0000117^OBO_REL:inheres_in(UBERON:FMA_7196-MA_0000141-MIAA_0000085-XAO_0000328-ZFA_0000436)]
MGI:1924872	Apex2	31	0.0614222	177	0.145833	71	3.53819	10	6.70033	[PATO:0000419^OBO_REL:inheres_in(UBERON:CL_0000232-CL_0000562-FMA_62845-ZFA_0009256), PATO:0001997^OBO_REL:inheres_in(UBERON:CL_0000232-CL_0000562-FMA_62845-ZFA_0009256)]
MGI:1919003	Tmprss6	32	0.0611925	125	0.153509	93	3.27539	10	6.70033	[PATO:0000419^OBO_REL:inheres_in(UBERON:CL_0000232-CL_0000562-FMA_62845-ZFA_0009256), PATO:0001997^OBO_REL:inheres_in(UBERON:CL_0000232-CL_0000562-FMA_62845-ZFA_0009256)]
MGI:1095405	Ptch2	33	0.0607542	235	0.13945	100	3.21498	10	6.70033	[PATO:0000419^OBO_REL:inheres_in(UBERON:CL_0000232-CL_0000562-FMA_62845-ZFA_0009256), PATO:0001997^OBO_REL:inheres_in(UBERON:CL_0000232-CL_0000562-FMA_62845-ZFA_0009256)]
MGI:95487	Fbln1	34	0.0607131	114	0.155251	163	2.87314	10	6.70033	[PATO:0000419^OBO_REL:inheres_in(UBERON:CL_0000232-CL_0000562-FMA_62845-ZFA_0009256), PATO:0001997^OBO_REL:inheres_in(UBERON:CL_0000232-CL_0000562-FMA_62845-ZFA_0009256)]
MGI:1932287	Egln2	35	0.0606749	237	0.139394	69	3.56857	36	6.1413	[PATO:0000070^OBO_REL:inheres_in(UBERON:CL_0000232-CL_0000562-FMA_62845-ZFA_0009256)]
MGI:108212	Ripk1	36	0.0602901	84	0.166667	216	2.42445	128	4.63047	[PATO:0000051^OBO_REL:inheres_in(UBERON:FMA_7196-MA_0000141-MIAA_0000085-XAO_0000328-ZFA_0000436)]
MGI:2149946	Gopc	37	0.0601671	100	0.159851	71	3.55819	5	8.97887	[GO:0005856]
MGI:1858306	Srpx	38	0.0600886	34	0.182965	166	2.83824	65	5.53408	[PATO:0000586^OBO_REL:inheres_in(UBERON:FMA_7196-MA_0000141-MIAA_0000085-XAO_0000328-ZFA_0000436), PATO:0001202^OBO_REL:inheres_in(UBERON:FMA_7196-MA_0000141-MIAA_0000085-XAO_0000328-ZFA_0000436)]
MGI:88547	Csnk2a2	39	0.0598549	178	0.145658	54	3.7145	5	8.97887	[GO:0005856]
MGI:1197009	Birc2	40	0.059765	22	0.188679	115	3.01198	139	4.23192	[PATO:0000419^OBO_REL:inheres_in(UBERON:CL_0000081-FMA_62844-ZFA_0009044), PATO:0001997^OBO_REL:inheres_in(UBERON:CL_0000081-FMA_62844-ZFA_0009044)]
MGI:98507	Tcf7	41	0.0590168	36	0.18125	115	3.01198	139	4.23192	[PATO:0000419^OBO_REL:inheres_in(UBERON:CL_0000081-FMA_62844-ZFA_0009044), PATO:0001997^OBO_REL:inheres_in(UBERON:CL_0000081-FMA_62844-ZFA_0009044)]
MGI:107527	Ly6a	42	0.0589079	160	0.147239	78	3.50042	36	6.1413	[PATO:0000070^OBO_REL:inheres_in(UBERON:CL_0000232-CL_0000562-FMA_62845-ZFA_0009256)]
MGI:1891150	Styx	43	0.0587224	105	0.156584	66	3.62615	5	8.97887	[GO:0005856]
MGI:88021	an	44	0.0586223	61	0.170455	218	2.41273	103	5.06133	[UBERON:CL_0000232-CL_0000562-FMA_62845-ZFA_0009256]
MGI:96079	Hgf	45	0.0584271	132	0.151724	159	2.89503	10	6.70033	[PATO:0000419^OBO_REL:inheres_in(UBERON:CL_0000232-CL_0000562-FMA_62845-ZFA_0009256), PATO:0001997^OBO_REL:inheres_in(UBERON:CL_0000232-CL_0000562-FMA_62845-ZFA_0009256)]
MGI:98587	Tcrb-V13	46	0.058108	37	0.181159	115	3.01198	139	4.23192	[PATO:0000419^OBO_REL:inheres_in(UBERON:CL_0000081-FMA_62844-ZFA_0009044), PATO:0001997^OBO_REL:inheres_in(UBERON:CL_0000081-FMA_62844-ZFA_0009044)]
MGI:1298377	Itgae	46	0.058108	37	0.181159	115	3.01198	139	4.23192	[PATO:0000419^OBO_REL:inheres_in(UBERON:CL_0000081-FMA_62844-ZFA_0009044), PATO:0001997^OBO_REL:inheres_in(UBERON:CL_0000081-FMA_62844-ZFA_0009044)]
MGI:1346316	Ccl19	46	0.058108	37	0.181159	168	2.83226	139	4.23192	[PATO:0000419^OBO_REL:inheres_in(UBERON:CL_0000081-FMA_62844-ZFA_0009044), PATO:0001997^OBO_REL:inheres_in(UBERON:CL_0000081-FMA_62844-ZFA_0009044)]
MGI:101919	Ap1g1	49	0.0580461	41	0.180272	223	2.3627	139	4.23192	[PATO:0000419^OBO_REL:inheres_in(UBERON:CL_0000081-FMA_62844-ZFA_0009044), PATO:0001997^OBO_REL:inheres_in(UBERON:CL_0000081-FMA_62844-ZFA_0009044)]
MGI:2139135	Anapc2	50	0.0580141	164	0.146727	108	3.16297	10	6.70033	[PATO:0000419^OBO_REL:inheres_in(UBERON:CL_0000232-CL_0000562-FMA_62845-ZFA_0009256), PATO:0001997^OBO_REL:inheres_in(UBERON:CL_0000232-CL_0000562-FMA_62845-ZFA_0009256)]
MGI:1099800	Nfkb2	51	0.057424	42	0.179811	113	3.07397	139	4.23192	[PATO:0000419^OBO_REL:inheres_in(UBERON:CL_0000081-FMA_62844-ZFA_0009044), PATO:0001997^OBO_REL:inheres_in(UBERON:CL_0000081-FMA_62844-ZFA_0009044)]
MGI:2152434	Crip3	52	0.0574236	43	0.179211	115	3.01198	139	4.23192	[PATO:0000419^OBO_REL:inheres_in(UBERON:CL_0000081-FMA_62844-ZFA_0009044), PATO:0001997^OBO_REL:inheres_in(UBERON:CL_0000081-FMA_62844-ZFA_0009044)]
MGI:97756	Srgn	53	0.057366	33	0.184502	115	3.01198	139	4.23192	[PATO:0000419^OBO_REL:inheres_in(UBERON:CL_0000081-FMA_62844-ZFA_0009044), PATO:0001997^OBO_REL:inheres_in(UBERON:CL_0000081-FMA_62844-ZFA_0009044)]
MGI:97748	Sypl	54	0.0572882	126	0.153425	176	2.7478	65	5.53408	[PATO:0000586^OBO_REL:inheres_in(UBERON:FMA_7196-MA_0000141-MIAA_0000085-XAO_0000328-ZFA_0000436), PATO:0001202^OBO_REL:inheres_in(UBERON:FMA_7196-MA_0000141-MIAA_0000085-XAO_0000328-ZFA_0000436)]
MGI:98785	Tnp2	55	0.0571081	159	0.147335	104	3.20193	5	8.97887	[GO:0005856]
MGI:1274787	Trdmt1	56	0.0568597	35	0.181495	203	2.53412	139	4.23192	[PATO:0000419^OBO_REL:inheres_in(UBERON:CL_0000081-FMA_62844-ZFA_0009044), PATO:0001997^OBO_REL:inheres_in(UBERON:CL_0000081-FMA_62844-ZFA_0009044)]
MGI:101786	Mtf1	57	0.0563594	83	0.167116	230	2.33262	139	4.23192	[PATO:0000419^OBO_REL:inheres_in(UBERON:CL_0000081-FMA_62844-ZFA_0009044), PATO:0001997^OBO_REL:inheres_in(UBERON:CL_0000081-FMA_62844-ZFA_0009044)]
MGI:1354193	Igk-Eik	58	0.0562444	175	0.146067	86	3.34756	108	4.98556	[PATO:0000117^OBO_REL:inheres_in(UBERON:FMA_7196-MA_0000141-MIAA_0000085-XAO_0000328-ZFA_0000436)]
MGI:1917514	Pggt1b	59	0.0557834	136	0.150685	217	2.41908	128	4.63047	[PATO:0000051^OBO_REL:inheres_in(UBERON:FMA_7196-MA_0000141-MIAA_0000085-XAO_0000328-ZFA_0000436)]
MGI:98625	Tcrg-C1	60	0.0548225	46	0.173611	115	3.01198	139	4.23192	[PATO:0000419^OBO_REL:inheres_in(UBERON:CL_0000081-FMA_62844-ZFA_0009044), PATO:0001997^OBO_REL:inheres_in(UBERON:CL_0000081-FMA_62844-ZFA_0009044)]
MGI:2656541	Lmr8	61	0.0546776	129	0.152231	75	3.51088	65	5.53408	[PATO:0000586^OBO_REL:inheres_in(UBERON:FMA_7196-MA_0000141-MIAA_0000085-XAO_0000328-ZFA_0000436), PATO:0001202^OBO_REL:inheres_in(UBERON:FMA_7196-MA_0000141-MIAA_0000085-XAO_0000328-ZFA_0000436)]
MGI:3578624	Itgad	62	0.0545869	185	0.144144	74	3.52402	128	4.63047	[PATO:0000051^OBO_REL:inheres_in(UBERON:FMA_7196-MA_0000141-MIAA_0000085-XAO_0000328-ZFA_0000436)]
MGI:103187	Nqo1	63	0.0545002	103	0.15847	202	2.54068	139	4.23192	[PATO:0000419^OBO_REL:inheres_in(UBERON:CL_0000081-FMA_62844-ZFA_0009044), PATO:0001997^OBO_REL:inheres_in(UBERON:CL_0000081-FMA_62844-ZFA_0009044)]
MGI:1889208	Cks1b	64	0.0544502	241	0.138889	233	2.29063	108	4.98556	[PATO:0000117^OBO_REL:inheres_in(UBERON:FMA_7196-MA_0000141-MIAA_0000085-XAO_0000328-ZFA_0000436)]
MGI:96526	Igl	65	0.0542411	197	0.142241	53	3.74177	108	4.98556	[PATO:0000117^OBO_REL:inheres_in(UBERON:FMA_7196-MA_0000141-MIAA_0000085-XAO_0000328-ZFA_0000436)]
MGI:1891748	Maea	66	0.0540759	120	0.154494	174	2.78055	56	5.83894	[PATO:0000051^OBO_REL:inheres_in(UBERON:CL_0000232-CL_0000562-FMA_62845-ZFA_0009256)]
MGI:1339941	Cxcl15	67	0.0539693	62	0.17	169	2.83226	139	4.23192	[PATO:0000419^OBO_REL:inheres_in(UBERON:CL_0000081-FMA_62844-ZFA_0009044), PATO:0001997^OBO_REL:inheres_in(UBERON:CL_0000081-FMA_62844-ZFA_0009044)]
MGI:2384761	Rapgef6	68	0.0539427	5	0.19917	96	3.2488	65	5.53408	[PATO:0000586^OBO_REL:inheres_in(UBERON:FMA_7196-MA_0000141-MIAA_0000085-XAO_0000328-ZFA_0000436), PATO:0001202^OBO_REL:inheres_in(UBERON:FMA_7196-MA_0000141-MIAA_0000085-XAO_0000328-ZFA_0000436)]
MGI:98086	Polr2a	69	0.0539049	88	0.165625	241	2.02629	139	4.23192	[PATO:0000419^OBO_REL:inheres_in(UBERON:CL_0000081-FMA_62844-ZFA_0009044), PATO:0001997^OBO_REL:inheres_in(UBERON:CL_0000081-FMA_62844-ZFA_0009044)]
MGI:94905	dm	70	0.0538917	108	0.15601	201	2.54627	103	5.06133	[UBERON:CL_0000232-CL_0000562-FMA_62845-ZFA_0009256]
MGI:2686922	Klhl6	71	0.0538629	208	0.141304	90	3.31763	108	4.98556	[PATO:0000117^OBO_REL:inheres_in(UBERON:FMA_7196-MA_0000141-MIAA_0000085-XAO_0000328-ZFA_0000436)]
MGI:98659	Dntt	72	0.0536055	70	0.16835	189	2.61384	139	4.23192	[PATO:0000419^OBO_REL:inheres_in(UBERON:CL_0000081-FMA_62844-ZFA_0009044), PATO:0001997^OBO_REL:inheres_in(UBERON:CL_0000081-FMA_62844-ZFA_0009044)]
MGI:95767	Gna12	73	0.0533642	236	0.139434	222	2.3718	128	4.63047	[PATO:0000051^OBO_REL:inheres_in(UBERON:FMA_7196-MA_0000141-MIAA_0000085-XAO_0000328-ZFA_0000436)]
MGI:1332236	Cds2	74	0.0531618	96	0.162939	214	2.44801	139	4.23192	[PATO:0000419^OBO_REL:inheres_in(UBERON:CL_0000081-FMA_62844-ZFA_0009044), PATO:0001997^OBO_REL:inheres_in(UBERON:CL_0000081-FMA_62844-ZFA_0009044)]
MGI:96617	Cd47	75	0.0531433	139	0.150289	203	2.53412	139	4.23192	[PATO:0000419^OBO_REL:inheres_in(UBERON:CL_0000081-FMA_62844-ZFA_0009044), PATO:0001997^OBO_REL:inheres_in(UBERON:CL_0000081-FMA_62844-ZFA_0009044)]
MGI:2676364	Hsh2d	76	0.0531214	247	0.138636	52	3.7705	65	5.53408	[PATO:0000586^OBO_REL:inheres_in(UBERON:FMA_7196-MA_0000141-MIAA_0000085-XAO_0000328-ZFA_0000436), PATO:0001202^OBO_REL:inheres_in(UBERON:FMA_7196-MA_0000141-MIAA_0000085-XAO_0000328-ZFA_0000436)]
MGI:1351654	Slc14a1	77	0.0530052	87	0.165663	107	3.18254	36	6.1413	[PATO:0000070^OBO_REL:inheres_in(UBERON:CL_0000232-CL_0000562-FMA_62845-ZFA_0009256)]
MGI:1921152	Psmb11	78	0.0529831	89	0.165563	115	3.01198	139	4.23192	[PATO:0000419^OBO_REL:inheres_in(UBERON:CL_0000081-FMA_62844-ZFA_0009044), PATO:0001997^OBO_REL:inheres_in(UBERON:CL_0000081-FMA_62844-ZFA_0009044)]
MGI:2386052	Cerk	79	0.0529415	136	0.150685	212	2.46789	139	4.23192	[PATO:0000419^OBO_REL:inheres_in(UBERON:CL_0000081-FMA_62844-ZFA_0009044), PATO:0001997^OBO_REL:inheres_in(UBERON:CL_0000081-FMA_62844-ZFA_0009044)]
MGI:88333	Cd3g	80	0.0527978	140	0.149856	115	3.01198	139	4.23192	[PATO:0000419^OBO_REL:inheres_in(UBERON:CL_0000081-FMA_62844-ZFA_0009044), PATO:0001997^OBO_REL:inheres_in(UBERON:CL_0000081-FMA_62844-ZFA_0009044)]
MGI:96529	Igll1	81	0.0527717	227	0.140389	68	3.58321	108	4.98556	[PATO:0000117^OBO_REL:inheres_in(UBERON:FMA_7196-MA_0000141-MIAA_0000085-XAO_0000328-ZFA_0000436)]
MGI:106190	Bcl11a	82	0.0527046	84	0.166667	178	2.711	139	4.23192	[PATO:0000419^OBO_REL:inheres_in(UBERON:CL_0000081-FMA_62844-ZFA_0009044), PATO:0001997^OBO_REL:inheres_in(UBERON:CL_0000081-FMA_62844-ZFA_0009044)]
MGI:102561	Cd1	83	0.052557	92	0.164557	102	3.20836	139	4.23192	[PATO:0000419^OBO_REL:inheres_in(UBERON:CL_0000081-FMA_62844-ZFA_0009044), PATO:0001997^OBO_REL:inheres_in(UBERON:CL_0000081-FMA_62844-ZFA_0009044)]
MGI:107675	Cd1d2	84	0.0523394	104	0.157729	169	2.83226	139	4.23192	[PATO:0000419^OBO_REL:inheres_in(UBERON:CL_0000081-FMA_62844-ZFA_0009044), PATO:0001997^OBO_REL:inheres_in(UBERON:CL_0000081-FMA_62844-ZFA_0009044)]
MGI:2443205	Rbm15	85	0.0519472	228	0.140351	167	2.8336	128	4.63047	[PATO:0000051^OBO_REL:inheres_in(UBERON:FMA_7196-MA_0000141-MIAA_0000085-XAO_0000328-ZFA_0000436)]
MGI:1277947	Fhit	86	0.0515232	121	0.154255	229	2.34025	139	4.23192	[PATO:0000419^OBO_REL:inheres_in(UBERON:CL_0000081-FMA_62844-ZFA_0009044), PATO:0001997^OBO_REL:inheres_in(UBERON:CL_0000081-FMA_62844-ZFA_0009044)]
MGI:3625868	Lmr18	87	0.0513978	8	0.194805	22	4.16103	65	5.53408	[PATO:0000586^OBO_REL:inheres_in(UBERON:FMA_7196-MA_0000141-MIAA_0000085-XAO_0000328-ZFA_0000436), PATO:0001202^OBO_REL:inheres_in(UBERON:FMA_7196-MA_0000141-MIAA_0000085-XAO_0000328-ZFA_0000436)]
MGI:2656513	Lmr7	87	0.0513978	8	0.194805	22	4.16103	65	5.53408	[PATO:0000586^OBO_REL:inheres_in(UBERON:FMA_7196-MA_0000141-MIAA_0000085-XAO_0000328-ZFA_0000436), PATO:0001202^OBO_REL:inheres_in(UBERON:FMA_7196-MA_0000141-MIAA_0000085-XAO_0000328-ZFA_0000436)]
MGI:3625869	Lmr19	87	0.0513978	8	0.194805	30	3.92631	65	5.53408	[PATO:0000586^OBO_REL:inheres_in(UBERON:FMA_7196-MA_0000141-MIAA_0000085-XAO_0000328-ZFA_0000436), PATO:0001202^OBO_REL:inheres_in(UBERON:FMA_7196-MA_0000141-MIAA_0000085-XAO_0000328-ZFA_0000436)]
MGI:3625866	Lmr16	87	0.0513978	8	0.194805	31	3.92631	65	5.53408	[PATO:0000586^OBO_REL:inheres_in(UBERON:FMA_7196-MA_0000141-MIAA_0000085-XAO_0000328-ZFA_0000436), PATO:0001202^OBO_REL:inheres_in(UBERON:FMA_7196-MA_0000141-MIAA_0000085-XAO_0000328-ZFA_0000436)]
MGI:3046813	Gcsfis	87	0.0513978	8	0.194805	31	3.92631	65	5.53408	[PATO:0000586^OBO_REL:inheres_in(UBERON:FMA_7196-MA_0000141-MIAA_0000085-XAO_0000328-ZFA_0000436), PATO:0001202^OBO_REL:inheres_in(UBERON:FMA_7196-MA_0000141-MIAA_0000085-XAO_0000328-ZFA_0000436)]
MGI:3036326	Lxw6	87	0.0513978	8	0.194805	31	3.92631	65	5.53408	[PATO:0000586^OBO_REL:inheres_in(UBERON:FMA_7196-MA_0000141-MIAA_0000085-XAO_0000328-ZFA_0000436), PATO:0001202^OBO_REL:inheres_in(UBERON:FMA_7196-MA_0000141-MIAA_0000085-XAO_0000328-ZFA_0000436)]
MGI:3036325	Lxw5	87	0.0513978	8	0.194805	31	3.92631	65	5.53408	[PATO:0000586^OBO_REL:inheres_in(UBERON:FMA_7196-MA_0000141-MIAA_0000085-XAO_0000328-ZFA_0000436), PATO:0001202^OBO_REL:inheres_in(UBERON:FMA_7196-MA_0000141-MIAA_0000085-XAO_0000328-ZFA_0000436)]
MGI:2149006	Lprm4	87	0.0513978	8	0.194805	31	3.92631	65	5.53408	[PATO:0000586^OBO_REL:inheres_in(UBERON:FMA_7196-MA_0000141-MIAA_0000085-XAO_0000328-ZFA_0000436), PATO:0001202^OBO_REL:inheres_in(UBERON:FMA_7196-MA_0000141-MIAA_0000085-XAO_0000328-ZFA_0000436)]
MGI:105970	Sbw1	87	0.0513978	8	0.194805	31	3.92631	65	5.53408	[PATO:0000586^OBO_REL:inheres_in(UBERON:FMA_7196-MA_0000141-MIAA_0000085-XAO_0000328-ZFA_0000436), PATO:0001202^OBO_REL:inheres_in(UBERON:FMA_7196-MA_0000141-MIAA_0000085-XAO_0000328-ZFA_0000436)]
MGI:105964	Sbw2	87	0.0513978	8	0.194805	31	3.92631	65	5.53408	[PATO:0000586^OBO_REL:inheres_in(UBERON:FMA_7196-MA_0000141-MIAA_0000085-XAO_0000328-ZFA_0000436), PATO:0001202^OBO_REL:inheres_in(UBERON:FMA_7196-MA_0000141-MIAA_0000085-XAO_0000328-ZFA_0000436)]
MGI:1098434	Rgs5	97	0.0512763	122	0.154255	234	2.28744	139	4.23192	[PATO:0000419^OBO_REL:inheres_in(UBERON:CL_0000081-FMA_62844-ZFA_0009044), PATO:0001997^OBO_REL:inheres_in(UBERON:CL_0000081-FMA_62844-ZFA_0009044)]
MGI:1289164	Ncaph2	98	0.0512239	242	0.138829	92	3.28173	128	4.63047	[PATO:0000051^OBO_REL:inheres_in(UBERON:FMA_7196-MA_0000141-MIAA_0000085-XAO_0000328-ZFA_0000436)]
MGI:97846	Rac2	99	0.0509919	233	0.140044	80	3.47437	128	4.63047	[PATO:0000051^OBO_REL:inheres_in(UBERON:FMA_7196-MA_0000141-MIAA_0000085-XAO_0000328-ZFA_0000436)]
MGI:104644	Il15ra	100	0.050862	176	0.146067	115	3.01198	139	4.23192	[PATO:0000419^OBO_REL:inheres_in(UBERON:CL_0000081-FMA_62844-ZFA_0009044), PATO:0001997^OBO_REL:inheres_in(UBERON:CL_0000081-FMA_62844-ZFA_0009044)]
MGI:107399	Il17ra	101	0.0504507	201	0.141844	172	2.79825	139	4.23192	[PATO:0000419^OBO_REL:inheres_in(UBERON:CL_0000081-FMA_62844-ZFA_0009044), PATO:0001997^OBO_REL:inheres_in(UBERON:CL_0000081-FMA_62844-ZFA_0009044)]
MGI:1100870	Gcnt2	102	0.0502981	192	0.143192	162	2.8735	139	4.23192	[PATO:0000419^OBO_REL:inheres_in(UBERON:CL_0000081-FMA_62844-ZFA_0009044), PATO:0001997^OBO_REL:inheres_in(UBERON:CL_0000081-FMA_62844-ZFA_0009044)]
MGI:2444848	Ptrh2	103	0.0502604	165	0.146635	237	2.15611	139	4.23192	[PATO:0000419^OBO_REL:inheres_in(UBERON:CL_0000081-FMA_62844-ZFA_0009044), PATO:0001997^OBO_REL:inheres_in(UBERON:CL_0000081-FMA_62844-ZFA_0009044)]
MGI:98484	Tap2	104	0.0501962	107	0.156156	102	3.20836	139	4.23192	[PATO:0000419^OBO_REL:inheres_in(UBERON:CL_0000081-FMA_62844-ZFA_0009044), PATO:0001997^OBO_REL:inheres_in(UBERON:CL_0000081-FMA_62844-ZFA_0009044)]
MGI:1336166	Cflar	105	0.0501643	153	0.147783	224	2.3505	139	4.23192	[PATO:0000419^OBO_REL:inheres_in(UBERON:CL_0000081-FMA_62844-ZFA_0009044), PATO:0001997^OBO_REL:inheres_in(UBERON:CL_0000081-FMA_62844-ZFA_0009044)]
MGI:1860374	Mad2l1	106	0.050043	143	0.149296	114	3.03433	33	6.63572	[GO:0043228, GO:0043232]
MGI:1339759	Csf2rb	107	0.0498171	209	0.141148	185	2.66955	139	4.23192	[PATO:0000419^OBO_REL:inheres_in(UBERON:CL_0000081-FMA_62844-ZFA_0009044), PATO:0001997^OBO_REL:inheres_in(UBERON:CL_0000081-FMA_62844-ZFA_0009044)]
MGI:1915525	Rpa1	108	0.0497551	150	0.148148	205	2.52178	101	5.1946	[GO:0005622]
MGI:1921984	Rhoh	109	0.0496566	223	0.140436	115	3.01198	139	4.23192	[PATO:0000419^OBO_REL:inheres_in(UBERON:CL_0000081-FMA_62844-ZFA_0009044), PATO:0001997^OBO_REL:inheres_in(UBERON:CL_0000081-FMA_62844-ZFA_0009044)]
MGI:3699858	Bmrbc4	110	0.0496345	72	0.167286	10	4.35711	36	6.1413	[PATO:0000070^OBO_REL:inheres_in(UBERON:CL_0000232-CL_0000562-FMA_62845-ZFA_0009256)]
MGI:3699857	Bmrbc3	110	0.0496345	72	0.167286	10	4.35711	36	6.1413	[PATO:0000070^OBO_REL:inheres_in(UBERON:CL_0000232-CL_0000562-FMA_62845-ZFA_0009256)]
MGI:3699856	Bmrbc2	110	0.0496345	72	0.167286	10	4.35711	36	6.1413	[PATO:0000070^OBO_REL:inheres_in(UBERON:CL_0000232-CL_0000562-FMA_62845-ZFA_0009256)]
MGI:3699855	Bmrbc1	110	0.0496345	72	0.167286	10	4.35711	36	6.1413	[PATO:0000070^OBO_REL:inheres_in(UBERON:CL_0000232-CL_0000562-FMA_62845-ZFA_0009256)]
MGI:3699854	Pbrbc3	110	0.0496345	72	0.167286	10	4.35711	36	6.1413	[PATO:0000070^OBO_REL:inheres_in(UBERON:CL_0000232-CL_0000562-FMA_62845-ZFA_0009256)]
MGI:3699853	Pbrbc2	110	0.0496345	72	0.167286	10	4.35711	36	6.1413	[PATO:0000070^OBO_REL:inheres_in(UBERON:CL_0000232-CL_0000562-FMA_62845-ZFA_0009256)]
MGI:3699852	Pbrbc1	110	0.0496345	72	0.167286	10	4.35711	36	6.1413	[PATO:0000070^OBO_REL:inheres_in(UBERON:CL_0000232-CL_0000562-FMA_62845-ZFA_0009256)]
MGI:3622210	Rbcq4	110	0.0496345	72	0.167286	10	4.35711	36	6.1413	[PATO:0000070^OBO_REL:inheres_in(UBERON:CL_0000232-CL_0000562-FMA_62845-ZFA_0009256)]
MGI:3622209	Rbcq3	110	0.0496345	72	0.167286	10	4.35711	36	6.1413	[PATO:0000070^OBO_REL:inheres_in(UBERON:CL_0000232-CL_0000562-FMA_62845-ZFA_0009256)]
MGI:3622208	Rbcq2	110	0.0496345	72	0.167286	10	4.35711	36	6.1413	[PATO:0000070^OBO_REL:inheres_in(UBERON:CL_0000232-CL_0000562-FMA_62845-ZFA_0009256)]
MGI:3622207	Rbcq1	110	0.0496345	72	0.167286	10	4.35711	36	6.1413	[PATO:0000070^OBO_REL:inheres_in(UBERON:CL_0000232-CL_0000562-FMA_62845-ZFA_0009256)]
MGI:3713746	Pbwg1.9	121	0.0495278	25	0.185185	31	3.92631	65	5.53408	[PATO:0000586^OBO_REL:inheres_in(UBERON:FMA_7196-MA_0000141-MIAA_0000085-XAO_0000328-ZFA_0000436), PATO:0001202^OBO_REL:inheres_in(UBERON:FMA_7196-MA_0000141-MIAA_0000085-XAO_0000328-ZFA_0000436)]
MGI:3698536	Swq6	121	0.0495278	25	0.185185	31	3.92631	65	5.53408	[PATO:0000586^OBO_REL:inheres_in(UBERON:FMA_7196-MA_0000141-MIAA_0000085-XAO_0000328-ZFA_0000436), PATO:0001202^OBO_REL:inheres_in(UBERON:FMA_7196-MA_0000141-MIAA_0000085-XAO_0000328-ZFA_0000436)]
MGI:3604986	Spnw4	121	0.0495278	25	0.185185	31	3.92631	65	5.53408	[PATO:0000586^OBO_REL:inheres_in(UBERON:FMA_7196-MA_0000141-MIAA_0000085-XAO_0000328-ZFA_0000436), PATO:0001202^OBO_REL:inheres_in(UBERON:FMA_7196-MA_0000141-MIAA_0000085-XAO_0000328-ZFA_0000436)]
MGI:3604983	Spnw1	121	0.0495278	25	0.185185	31	3.92631	65	5.53408	[PATO:0000586^OBO_REL:inheres_in(UBERON:FMA_7196-MA_0000141-MIAA_0000085-XAO_0000328-ZFA_0000436), PATO:0001202^OBO_REL:inheres_in(UBERON:FMA_7196-MA_0000141-MIAA_0000085-XAO_0000328-ZFA_0000436)]
MGI:3525634	Splwt1	121	0.0495278	25	0.185185	31	3.92631	65	5.53408	[PATO:0000586^OBO_REL:inheres_in(UBERON:FMA_7196-MA_0000141-MIAA_0000085-XAO_0000328-ZFA_0000436), PATO:0001202^OBO_REL:inheres_in(UBERON:FMA_7196-MA_0000141-MIAA_0000085-XAO_0000328-ZFA_0000436)]
MGI:3042415	Orgwq6	121	0.0495278	25	0.185185	31	3.92631	65	5.53408	[PATO:0000586^OBO_REL:inheres_in(UBERON:FMA_7196-MA_0000141-MIAA_0000085-XAO_0000328-ZFA_0000436), PATO:0001202^OBO_REL:inheres_in(UBERON:FMA_7196-MA_0000141-MIAA_0000085-XAO_0000328-ZFA_0000436)]
MGI:3042411	Orgwq2	121	0.0495278	25	0.185185	31	3.92631	65	5.53408	[PATO:0000586^OBO_REL:inheres_in(UBERON:FMA_7196-MA_0000141-MIAA_0000085-XAO_0000328-ZFA_0000436), PATO:0001202^OBO_REL:inheres_in(UBERON:FMA_7196-MA_0000141-MIAA_0000085-XAO_0000328-ZFA_0000436)]
MGI:1346527	Psmb8	128	0.0492336	109	0.155963	209	2.49816	139	4.23192	[PATO:0000419^OBO_REL:inheres_in(UBERON:CL_0000081-FMA_62844-ZFA_0009044), PATO:0001997^OBO_REL:inheres_in(UBERON:CL_0000081-FMA_62844-ZFA_0009044)]
MGI:95895	H2-Aa	129	0.049131	149	0.148241	164	2.85843	139	4.23192	[PATO:0000419^OBO_REL:inheres_in(UBERON:CL_0000081-FMA_62844-ZFA_0009044), PATO:0001997^OBO_REL:inheres_in(UBERON:CL_0000081-FMA_62844-ZFA_0009044)]
MGI:102853	Elk4	130	0.0488395	244	0.138667	115	3.01198	139	4.23192	[PATO:0000419^OBO_REL:inheres_in(UBERON:CL_0000081-FMA_62844-ZFA_0009044), PATO:0001997^OBO_REL:inheres_in(UBERON:CL_0000081-FMA_62844-ZFA_0009044)]
MGI:98496	Tbxa2r	131	0.0487095	134	0.151596	190	2.61026	65	5.53408	[PATO:0000586^OBO_REL:inheres_in(UBERON:FMA_7196-MA_0000141-MIAA_0000085-XAO_0000328-ZFA_0000436), PATO:0001202^OBO_REL:inheres_in(UBERON:FMA_7196-MA_0000141-MIAA_0000085-XAO_0000328-ZFA_0000436)]
MGI:1858224	Chst3	132	0.0483299	199	0.142045	187	2.65819	139	4.23192	[PATO:0000419^OBO_REL:inheres_in(UBERON:CL_0000081-FMA_62844-ZFA_0009044), PATO:0001997^OBO_REL:inheres_in(UBERON:CL_0000081-FMA_62844-ZFA_0009044)]
MGI:1203735	Lmb4	133	0.0482934	44	0.17603	97	3.23816	65	5.53408	[PATO:0000586^OBO_REL:inheres_in(UBERON:FMA_7196-MA_0000141-MIAA_0000085-XAO_0000328-ZFA_0000436), PATO:0001202^OBO_REL:inheres_in(UBERON:FMA_7196-MA_0000141-MIAA_0000085-XAO_0000328-ZFA_0000436)]
MGI:1346526	Psmb9	134	0.0476288	169	0.146479	210	2.49744	139	4.23192	[PATO:0000419^OBO_REL:inheres_in(UBERON:CL_0000081-FMA_62844-ZFA_0009044), PATO:0001997^OBO_REL:inheres_in(UBERON:CL_0000081-FMA_62844-ZFA_0009044)]
MGI:3622218	Chcmq2	135	0.0473358	110	0.155932	7	4.55349	36	6.1413	[PATO:0000070^OBO_REL:inheres_in(UBERON:CL_0000232-CL_0000562-FMA_62845-ZFA_0009256)]
MGI:3622217	Chcmq1	135	0.0473358	110	0.155932	7	4.55349	36	6.1413	[PATO:0000070^OBO_REL:inheres_in(UBERON:CL_0000232-CL_0000562-FMA_62845-ZFA_0009256)]
MGI:3622211	Hgbq1	135	0.0473358	110	0.155932	7	4.55349	36	6.1413	[PATO:0000070^OBO_REL:inheres_in(UBERON:CL_0000232-CL_0000562-FMA_62845-ZFA_0009256)]
MGI:99440	Cd33	138	0.047127	162	0.146965	67	3.606	36	6.1413	[PATO:0000070^OBO_REL:inheres_in(UBERON:CL_0000232-CL_0000562-FMA_62845-ZFA_0009256)]
MGI:104737	Cdkn2b	139	0.047101	212	0.141026	177	2.72283	65	5.53408	[PATO:0000586^OBO_REL:inheres_in(UBERON:FMA_7196-MA_0000141-MIAA_0000085-XAO_0000328-ZFA_0000436), PATO:0001202^OBO_REL:inheres_in(UBERON:FMA_7196-MA_0000141-MIAA_0000085-XAO_0000328-ZFA_0000436)]
MGI:88329	Cd34	140	0.0469323	150	0.148148	200	2.54899	139	4.23192	[PATO:0000419^OBO_REL:inheres_in(UBERON:CL_0000081-FMA_62844-ZFA_0009044), PATO:0001997^OBO_REL:inheres_in(UBERON:CL_0000081-FMA_62844-ZFA_0009044)]
MGI:109275	Trim24	141	0.0467976	102	0.158915	129	2.92186	33	6.63572	[GO:0043228, GO:0043232]
MGI:99460	Notch3	142	0.0467321	207	0.141463	235	2.21919	139	4.23192	[PATO:0000419^OBO_REL:inheres_in(UBERON:CL_0000081-FMA_62844-ZFA_0009044), PATO:0001997^OBO_REL:inheres_in(UBERON:CL_0000081-FMA_62844-ZFA_0009044)]
MGI:700014	Sorbs1	143	0.0466323	238	0.139175	215	2.43154	139	4.23192	[PATO:0000419^OBO_REL:inheres_in(UBERON:CL_0000081-FMA_62844-ZFA_0009044), PATO:0001997^OBO_REL:inheres_in(UBERON:CL_0000081-FMA_62844-ZFA_0009044)]
MGI:1930076	Rps6ka4	144	0.0465658	230	0.140306	84	3.37375	108	4.98556	[PATO:0000117^OBO_REL:inheres_in(UBERON:FMA_7196-MA_0000141-MIAA_0000085-XAO_0000328-ZFA_0000436)]
MGI:96975	Mgl1	145	0.0461773	123	0.153846	10	4.35711	36	6.1413	[PATO:0000070^OBO_REL:inheres_in(UBERON:CL_0000232-CL_0000562-FMA_62845-ZFA_0009256)]
MGI:88384	F9	146	0.0457083	106	0.156463	245	1.85353	65	5.53408	[PATO:0000586^OBO_REL:inheres_in(UBERON:FMA_7196-MA_0000141-MIAA_0000085-XAO_0000328-ZFA_0000436), PATO:0001202^OBO_REL:inheres_in(UBERON:FMA_7196-MA_0000141-MIAA_0000085-XAO_0000328-ZFA_0000436)]
MGI:103567	Cxcr5	147	0.0456078	123	0.153846	112	3.11295	128	4.63047	[PATO:0000051^OBO_REL:inheres_in(UBERON:FMA_7196-MA_0000141-MIAA_0000085-XAO_0000328-ZFA_0000436)]
MGI:1099448	Ccl25	148	0.0455271	214	0.140541	158	2.89735	139	4.23192	[PATO:0000419^OBO_REL:inheres_in(UBERON:CL_0000081-FMA_62844-ZFA_0009044), PATO:0001997^OBO_REL:inheres_in(UBERON:CL_0000081-FMA_62844-ZFA_0009044)]
MGI:2387104	Nidd3k	149	0.0453003	166	0.14658	28	3.94278	36	6.1413	[PATO:0000070^OBO_REL:inheres_in(UBERON:CL_0000232-CL_0000562-FMA_62845-ZFA_0009256)]
MGI:3583085	Imebt1	150	0.044472	97	0.162455	183	2.67686	65	5.53408	[PATO:0000586^OBO_REL:inheres_in(UBERON:FMA_7196-MA_0000141-MIAA_0000085-XAO_0000328-ZFA_0000436), PATO:0001202^OBO_REL:inheres_in(UBERON:FMA_7196-MA_0000141-MIAA_0000085-XAO_0000328-ZFA_0000436)]
MGI:3042410	Orgwq1	151	0.0436846	127	0.153094	99	3.21779	65	5.53408	[PATO:0000586^OBO_REL:inheres_in(UBERON:FMA_7196-MA_0000141-MIAA_0000085-XAO_0000328-ZFA_0000436), PATO:0001202^OBO_REL:inheres_in(UBERON:FMA_7196-MA_0000141-MIAA_0000085-XAO_0000328-ZFA_0000436)]
MGI:1195972	Terf2	152	0.0436469	210	0.141129	195	2.55364	33	6.63572	[GO:0043228, GO:0043232]
MGI:1353495	Slc25a4	153	0.0432227	179	0.145401	182	2.68666	101	5.1946	[GO:0005622]
MGI:3574410	Wbcq6	154	0.043165	63	0.169291	130	2.92006	186	3.77231	[PATO:0000053^OBO_REL:inheres_in(UBERON:CL_0000081-FMA_62844-ZFA_0009044), PATO:0000070^OBO_REL:inheres_in(UBERON:CL_0000081-FMA_62844-ZFA_0009044)]
MGI:3574409	Wbcq5	154	0.043165	63	0.169291	130	2.92006	186	3.77231	[PATO:0000053^OBO_REL:inheres_in(UBERON:CL_0000081-FMA_62844-ZFA_0009044), PATO:0000070^OBO_REL:inheres_in(UBERON:CL_0000081-FMA_62844-ZFA_0009044)]
MGI:3574408	Wbcq4	154	0.043165	63	0.169291	130	2.92006	186	3.77231	[PATO:0000053^OBO_REL:inheres_in(UBERON:CL_0000081-FMA_62844-ZFA_0009044), PATO:0000070^OBO_REL:inheres_in(UBERON:CL_0000081-FMA_62844-ZFA_0009044)]
MGI:3574407	Wbcq3	154	0.043165	63	0.169291	130	2.92006	186	3.77231	[PATO:0000053^OBO_REL:inheres_in(UBERON:CL_0000081-FMA_62844-ZFA_0009044), PATO:0000070^OBO_REL:inheres_in(UBERON:CL_0000081-FMA_62844-ZFA_0009044)]
MGI:3574406	Wbcq2	154	0.043165	63	0.169291	130	2.92006	186	3.77231	[PATO:0000053^OBO_REL:inheres_in(UBERON:CL_0000081-FMA_62844-ZFA_0009044), PATO:0000070^OBO_REL:inheres_in(UBERON:CL_0000081-FMA_62844-ZFA_0009044)]
MGI:3574405	Wbcq1	154	0.043165	63	0.169291	130	2.92006	186	3.77231	[PATO:0000053^OBO_REL:inheres_in(UBERON:CL_0000081-FMA_62844-ZFA_0009044), PATO:0000070^OBO_REL:inheres_in(UBERON:CL_0000081-FMA_62844-ZFA_0009044)]
MGI:99908	Tnfrsf8	160	0.0429966	119	0.154545	171	2.8209	186	3.77231	[PATO:0000053^OBO_REL:inheres_in(UBERON:CL_0000081-FMA_62844-ZFA_0009044), PATO:0000070^OBO_REL:inheres_in(UBERON:CL_0000081-FMA_62844-ZFA_0009044)]
MGI:1917923	Prdm16	161	0.0428746	71	0.167315	213	2.45752	186	3.77231	[PATO:0000053^OBO_REL:inheres_in(UBERON:CL_0000081-FMA_62844-ZFA_0009044), PATO:0000070^OBO_REL:inheres_in(UBERON:CL_0000081-FMA_62844-ZFA_0009044)]
MGI:1933533	Hamp	162	0.0421328	191	0.143266	105	3.19122	103	5.06133	[UBERON:CL_0000232-CL_0000562-FMA_62845-ZFA_0009256]
MGI:1343153	Sprol1	163	0.0417041	99	0.160448	130	2.92006	186	3.77231	[PATO:0000053^OBO_REL:inheres_in(UBERON:CL_0000081-FMA_62844-ZFA_0009044), PATO:0000070^OBO_REL:inheres_in(UBERON:CL_0000081-FMA_62844-ZFA_0009044)]
MGI:3042417	Orgwq8	164	0.0416447	141	0.149502	75	3.52088	65	5.53408	[PATO:0000586^OBO_REL:inheres_in(UBERON:FMA_7196-MA_0000141-MIAA_0000085-XAO_0000328-ZFA_0000436), PATO:0001202^OBO_REL:inheres_in(UBERON:FMA_7196-MA_0000141-MIAA_0000085-XAO_0000328-ZFA_0000436)]
MGI:3042416	Orgwq7	165	0.0416447	141	0.149502	75	3.52088	65	5.53408	[PATO:0000586^OBO_REL:inheres_in(UBERON:FMA_7196-MA_0000141-MIAA_0000085-XAO_0000328-ZFA_0000436), PATO:0001202^OBO_REL:inheres_in(UBERON:FMA_7196-MA_0000141-MIAA_0000085-XAO_0000328-ZFA_0000436)]
MGI:1927238	Mllt1	166	0.0413431	187	0.14377	221	2.37254	65	5.53408	[PATO:0000586^OBO_REL:inheres_in(UBERON:FMA_7196-MA_0000141-MIAA_0000085-XAO_0000328-ZFA_0000436), PATO:0001202^OBO_REL:inheres_in(UBERON:FMA_7196-MA_0000141-MIAA_0000085-XAO_0000328-ZFA_0000436)]
MGI:98857	Tsta3	167	0.0408829	196	0.142458	244	1.93971	186	3.77231	[PATO:0000053^OBO_REL:inheres_in(UBERON:CL_0000081-FMA_62844-ZFA_0009044), PATO:0000070^OBO_REL:inheres_in(UBERON:CL_0000081-FMA_62844-ZFA_0009044)]
MGI:3723100	Mtbcq2	168	0.0407457	161	0.147059	101	3.21052	65	5.53408	[PATO:0000586^OBO_REL:inheres_in(UBERON:FMA_7196-MA_0000141-MIAA_0000085-XAO_0000328-ZFA_0000436), PATO:0001202^OBO_REL:inheres_in(UBERON:FMA_7196-MA_0000141-MIAA_0000085-XAO_0000328-ZFA_0000436)]
MGI:1930819	Pbbcp1	169	0.0403435	118	0.154676	130	2.92006	186	3.77231	[PATO:0000053^OBO_REL:inheres_in(UBERON:CL_0000081-FMA_62844-ZFA_0009044), PATO:0000070^OBO_REL:inheres_in(UBERON:CL_0000081-FMA_62844-ZFA_0009044)]
MGI:3723111	Swqnd2	170	0.040243	50	0.172131	55	3.65205	108	4.98556	[PATO:0000117^OBO_REL:inheres_in(UBERON:FMA_7196-MA_0000141-MIAA_0000085-XAO_0000328-ZFA_0000436)]
MGI:3723110	Swqnd1	170	0.040243	50	0.172131	55	3.65205	108	4.98556	[PATO:0000117^OBO_REL:inheres_in(UBERON:FMA_7196-MA_0000141-MIAA_0000085-XAO_0000328-ZFA_0000436)]
MGI:3042926	Splq9	170	0.040243	50	0.172131	55	3.65205	108	4.98556	[PATO:0000117^OBO_REL:inheres_in(UBERON:FMA_7196-MA_0000141-MIAA_0000085-XAO_0000328-ZFA_0000436)]
MGI:3042925	Splq8	170	0.040243	50	0.172131	55	3.65205	108	4.98556	[PATO:0000117^OBO_REL:inheres_in(UBERON:FMA_7196-MA_0000141-MIAA_0000085-XAO_0000328-ZFA_0000436)]
MGI:3042909	Splq4	170	0.040243	50	0.172131	55	3.65205	108	4.98556	[PATO:0000117^OBO_REL:inheres_in(UBERON:FMA_7196-MA_0000141-MIAA_0000085-XAO_0000328-ZFA_0000436)]
MGI:3042905	Splq7	170	0.040243	50	0.172131	55	3.65205	108	4.98556	[PATO:0000117^OBO_REL:inheres_in(UBERON:FMA_7196-MA_0000141-MIAA_0000085-XAO_0000328-ZFA_0000436)]
MGI:3042894	Splq6	170	0.040243	50	0.172131	55	3.65205	108	4.98556	[PATO:0000117^OBO_REL:inheres_in(UBERON:FMA_7196-MA_0000141-MIAA_0000085-XAO_0000328-ZFA_0000436)]
MGI:3042888	Splq2	170	0.040243	50	0.172131	55	3.65205	108	4.98556	[PATO:0000117^OBO_REL:inheres_in(UBERON:FMA_7196-MA_0000141-MIAA_0000085-XAO_0000328-ZFA_0000436)]
MGI:3042882	Splq1	170	0.040243	50	0.172131	55	3.65205	108	4.98556	[PATO:0000117^OBO_REL:inheres_in(UBERON:FMA_7196-MA_0000141-MIAA_0000085-XAO_0000328-ZFA_0000436)]
MGI:3042880	Splq5	170	0.040243	50	0.172131	55	3.65205	108	4.98556	[PATO:0000117^OBO_REL:inheres_in(UBERON:FMA_7196-MA_0000141-MIAA_0000085-XAO_0000328-ZFA_0000436)]
MGI:3042876	Splq3	170	0.040243	50	0.172131	55	3.65205	108	4.98556	[PATO:0000117^OBO_REL:inheres_in(UBERON:FMA_7196-MA_0000141-MIAA_0000085-XAO_0000328-ZFA_0000436)]
MGI:88072	Arp	181	0.0400108	182	0.145062	127	2.97185	65	5.53408	[PATO:0000586^OBO_REL:inheres_in(UBERON:FMA_7196-MA_0000141-MIAA_0000085-XAO_0000328-ZFA_0000436), PATO:0001202^OBO_REL:inheres_in(UBERON:FMA_7196-MA_0000141-MIAA_0000085-XAO_0000328-ZFA_0000436)]
MGI:96187	Hoxb6	182	0.0399652	240	0.138965	161	2.8786	103	5.06133	[UBERON:CL_0000232-CL_0000562-FMA_62845-ZFA_0009256]
MGI:2443160	Pag1	183	0.0398753	131	0.151943	130	2.92006	186	3.77231	[PATO:0000053^OBO_REL:inheres_in(UBERON:CL_0000081-FMA_62844-ZFA_0009044), PATO:0000070^OBO_REL:inheres_in(UBERON:CL_0000081-FMA_62844-ZFA_0009044)]
MGI:1098272	Rnasel	184	0.0398637	130	0.152174	194	2.57861	226	3.04376	[PATO:0000460^OBO_REL:inheres_in(UBERON:0000008)]
MGI:96944	Mcr	185	0.0397485	115	0.155235	130	2.92006	186	3.77231	[PATO:0000053^OBO_REL:inheres_in(UBERON:CL_0000081-FMA_62844-ZFA_0009044), PATO:0000070^OBO_REL:inheres_in(UBERON:CL_0000081-FMA_62844-ZFA_0009044)]
MGI:2385436	Bcmd2	186	0.0397485	115	0.155235	130	2.92006	186	3.77231	[PATO:0000053^OBO_REL:inheres_in(UBERON:CL_0000081-FMA_62844-ZFA_0009044), PATO:0000070^OBO_REL:inheres_in(UBERON:CL_0000081-FMA_62844-ZFA_0009044)]
MGI:95880	Gypa	187	0.0389559	135	0.150794	45	3.91106	56	5.83894	[PATO:0000051^OBO_REL:inheres_in(UBERON:CL_0000232-CL_0000562-FMA_62845-ZFA_0009256)]
MGI:1347095	Cd97	188	0.0386692	169	0.146259	219	2.38268	186	3.77231	[PATO:0000053^OBO_REL:inheres_in(UBERON:CL_0000081-FMA_62844-ZFA_0009044), PATO:0000070^OBO_REL:inheres_in(UBERON:CL_0000081-FMA_62844-ZFA_0009044)]
MGI:107442	Tsil	189	0.0386455	193	0.142857	232	2.29401	186	3.77231	[PATO:0000053^OBO_REL:inheres_in(UBERON:CL_0000081-FMA_62844-ZFA_0009044), PATO:0000070^OBO_REL:inheres_in(UBERON:CL_0000081-FMA_62844-ZFA_0009044)]
MGI:95660	Gas6	190	0.038631	183	0.144543	236	2.17791	182	4.01266	[GO:0051234]
MGI:3622216	Mcvq3	191	0.0385529	144	0.149254	45	3.91106	56	5.83894	[PATO:0000051^OBO_REL:inheres_in(UBERON:CL_0000232-CL_0000562-FMA_62845-ZFA_0009256)]
MGI:3622214	Mcvq1	192	0.0385529	144	0.149254	45	3.91106	56	5.83894	[PATO:0000051^OBO_REL:inheres_in(UBERON:CL_0000232-CL_0000562-FMA_62845-ZFA_0009256)]
MGI:2681137	Nktcn2	193	0.0384142	154	0.147766	130	2.92006	186	3.77231	[PATO:0000053^OBO_REL:inheres_in(UBERON:CL_0000081-FMA_62844-ZFA_0009044), PATO:0000070^OBO_REL:inheres_in(UBERON:CL_0000081-FMA_62844-ZFA_0009044)]
MGI:2681136	Nktcn1	193	0.0384142	154	0.147766	130	2.92006	186	3.77231	[PATO:0000053^OBO_REL:inheres_in(UBERON:CL_0000081-FMA_62844-ZFA_0009044), PATO:0000070^OBO_REL:inheres_in(UBERON:CL_0000081-FMA_62844-ZFA_0009044)]
MGI:3622215	Mcvq2	195	0.0383633	146	0.148699	45	3.91106	56	5.83894	[PATO:0000051^OBO_REL:inheres_in(UBERON:CL_0000232-CL_0000562-FMA_62845-ZFA_0009256)]
MGI:2653620	Hsm1	196	0.0383633	146	0.148699	45	3.91106	56	5.83894	[PATO:0000051^OBO_REL:inheres_in(UBERON:CL_0000232-CL_0000562-FMA_62845-ZFA_0009256)]
MGI:894697	Rad54l	197	0.0383516	150	0.148148	95	3.25344	56	5.83894	[PATO:0000051^OBO_REL:inheres_in(UBERON:CL_0000232-CL_0000562-FMA_62845-ZFA_0009256)]
MGI:1340030	Crlf1	198	0.0383105	200	0.141975	238	2.11623	226	3.04376	[PATO:0000460^OBO_REL:inheres_in(UBERON:0000008)]
MGI:88266	Capns1	199	0.0381312	117	0.15493	242	1.98976	226	3.04376	[PATO:0000460^OBO_REL:inheres_in(UBERON:0000008)]
MGI:2661277	Cd8mts4	200	0.0379953	169	0.146259	130	2.92006	186	3.77231	[PATO:0000053^OBO_REL:inheres_in(UBERON:CL_0000081-FMA_62844-ZFA_0009044), PATO:0000070^OBO_REL:inheres_in(UBERON:CL_0000081-FMA_62844-ZFA_0009044)]
MGI:2661248	Cd8mts3	200	0.0379953	169	0.146259	130	2.92006	186	3.77231	[PATO:0000053^OBO_REL:inheres_in(UBERON:CL_0000081-FMA_62844-ZFA_0009044), PATO:0000070^OBO_REL:inheres_in(UBERON:CL_0000081-FMA_62844-ZFA_0009044)]
MGI:2661243	Cd8mts2	200	0.0379953	169	0.146259	130	2.92006	186	3.77231	[PATO:0000053^OBO_REL:inheres_in(UBERON:CL_0000081-FMA_62844-ZFA_0009044), PATO:0000070^OBO_REL:inheres_in(UBERON:CL_0000081-FMA_62844-ZFA_0009044)]
MGI:2661242	Cd8mts1	200	0.0379953	169	0.146259	130	2.92006	186	3.77231	[PATO:0000053^OBO_REL:inheres_in(UBERON:CL_0000081-FMA_62844-ZFA_0009044), PATO:0000070^OBO_REL:inheres_in(UBERON:CL_0000081-FMA_62844-ZFA_0009044)]
MGI:1351865	Slco1a5	204	0.0377627	189	0.143333	130	2.92006	186	3.77231	[PATO:0000053^OBO_REL:inheres_in(UBERON:CL_0000081-FMA_62844-ZFA_0009044), PATO:0000070^OBO_REL:inheres_in(UBERON:CL_0000081-FMA_62844-ZFA_0009044)]
MGI:1890082	Idd9.1	205	0.0377405	193	0.142857	192	2.58159	186	3.77231	[PATO:0000053^OBO_REL:inheres_in(UBERON:CL_0000081-FMA_62844-ZFA_0009044), PATO:0000070^OBO_REL:inheres_in(UBERON:CL_0000081-FMA_62844-ZFA_0009044)]
MGI:109546	Tlf	206	0.0376973	189	0.143333	130	2.92006	186	3.77231	[PATO:0000053^OBO_REL:inheres_in(UBERON:CL_0000081-FMA_62844-ZFA_0009044), PATO:0000070^OBO_REL:inheres_in(UBERON:CL_0000081-FMA_62844-ZFA_0009044)]
MGI:98889	Ubc	207	0.0373155	168	0.146497	239	2.07296	226	3.04376	[PATO:0000460^OBO_REL:inheres_in(UBERON:0000008)]
MGI:2151486	Char4	208	0.0371373	95	0.16309	175	2.75566	186	3.77231	[PATO:0000053^OBO_REL:inheres_in(UBERON:CL_0000081-FMA_62844-ZFA_0009044), PATO:0000070^OBO_REL:inheres_in(UBERON:CL_0000081-FMA_62844-ZFA_0009044)]
MGI:96404	Idd2	209	0.0370483	243	0.13871	193	2.58159	186	3.77231	[PATO:0000053^OBO_REL:inheres_in(UBERON:CL_0000081-FMA_62844-ZFA_0009044), PATO:0000070^OBO_REL:inheres_in(UBERON:CL_0000081-FMA_62844-ZFA_0009044)]
MGI:3575698	Cspt	210	0.036837	215	0.140523	130	2.92006	186	3.77231	[PATO:0000053^OBO_REL:inheres_in(UBERON:CL_0000081-FMA_62844-ZFA_0009044), PATO:0000070^OBO_REL:inheres_in(UBERON:CL_0000081-FMA_62844-ZFA_0009044)]
MGI:2661284	Cd8mts6	210	0.036837	215	0.140523	130	2.92006	186	3.77231	[PATO:0000053^OBO_REL:inheres_in(UBERON:CL_0000081-FMA_62844-ZFA_0009044), PATO:0000070^OBO_REL:inheres_in(UBERON:CL_0000081-FMA_62844-ZFA_0009044)]
MGI:2661281	Cd8ts3	210	0.036837	215	0.140523	130	2.92006	186	3.77231	[PATO:0000053^OBO_REL:inheres_in(UBERON:CL_0000081-FMA_62844-ZFA_0009044), PATO:0000070^OBO_REL:inheres_in(UBERON:CL_0000081-FMA_62844-ZFA_0009044)]
MGI:2661275	Cd8ts2	210	0.036837	215	0.140523	130	2.92006	186	3.77231	[PATO:0000053^OBO_REL:inheres_in(UBERON:CL_0000081-FMA_62844-ZFA_0009044), PATO:0000070^OBO_REL:inheres_in(UBERON:CL_0000081-FMA_62844-ZFA_0009044)]
MGI:2661259	Pcd8ts1	210	0.036837	215	0.140523	130	2.92006	186	3.77231	[PATO:0000053^OBO_REL:inheres_in(UBERON:CL_0000081-FMA_62844-ZFA_0009044), PATO:0000070^OBO_REL:inheres_in(UBERON:CL_0000081-FMA_62844-ZFA_0009044)]
MGI:2661257	Cd8ts1	210	0.036837	215	0.140523	130	2.92006	186	3.77231	[PATO:0000053^OBO_REL:inheres_in(UBERON:CL_0000081-FMA_62844-ZFA_0009044), PATO:0000070^OBO_REL:inheres_in(UBERON:CL_0000081-FMA_62844-ZFA_0009044)]
MGI:1330232	Tlf2	210	0.036837	215	0.140523	130	2.92006	186	3.77231	[PATO:0000053^OBO_REL:inheres_in(UBERON:CL_0000081-FMA_62844-ZFA_0009044), PATO:0000070^OBO_REL:inheres_in(UBERON:CL_0000081-FMA_62844-ZFA_0009044)]
MGI:2661283	Cd8mts5	217	0.0365012	231	0.140065	130	2.92006	186	3.77231	[PATO:0000053^OBO_REL:inheres_in(UBERON:CL_0000081-FMA_62844-ZFA_0009044), PATO:0000070^OBO_REL:inheres_in(UBERON:CL_0000081-FMA_62844-ZFA_0009044)]
MGI:2661278	Cd4ts5	217	0.0365012	232	0.140065	130	2.92006	186	3.77231	[PATO:0000053^OBO_REL:inheres_in(UBERON:CL_0000081-FMA_62844-ZFA_0009044), PATO:0000070^OBO_REL:inheres_in(UBERON:CL_0000081-FMA_62844-ZFA_0009044)]
MGI:98769	Tlx1	219	0.036229	146	0.148649	184	2.67399	128	4.63047	[PATO:0000051^OBO_REL:inheres_in(UBERON:FMA_7196-MA_0000141-MIAA_0000085-XAO_0000328-ZFA_0000436)]
MGI:1924897	Trat1	220	0.0354371	186	0.143791	186	2.6589	108	4.98556	[PATO:0000117^OBO_REL:inheres_in(UBERON:FMA_7196-MA_0000141-MIAA_0000085-XAO_0000328-ZFA_0000436)]
MGI:1351646	Abca7	221	0.0343134	184	0.144231	165	2.85321	222	3.40733	[PATO:0000460^OBO_REL:inheres_in(UBERON:FMA_62970-MA_0002501-MIAA_0000052)]
MGI:1890950	Capop	222	0.033203	188	0.143411	179	2.707	226	3.04376	[PATO:0000460^OBO_REL:inheres_in(UBERON:0000008)]
MGI:88479	Cpa3	223	0.0331266	181	0.145098	179	2.707	226	3.04376	[PATO:0000460^OBO_REL:inheres_in(UBERON:0000008)]
MGI:87915	Ad	224	0.033122	180	0.145161	220	2.38224	222	3.40733	[PATO:0000460^OBO_REL:inheres_in(UBERON:FMA_62970-MA_0002501-MIAA_0000052)]
MGI:88210	Bsp	225	0.0328411	93	0.164319	208	2.50585	128	4.63047	[PATO:0000051^OBO_REL:inheres_in(UBERON:FMA_7196-MA_0000141-MIAA_0000085-XAO_0000328-ZFA_0000436)]
MGI:2180140	Tnfsf15	226	0.032434	193	0.142857	196	2.55233	226	3.04376	[PATO:0000460^OBO_REL:inheres_in(UBERON:0000008)]
MGI:107546	Art2a	227	0.0323063	248	0.138577	196	2.55233	226	3.04376	[PATO:0000460^OBO_REL:inheres_in(UBERON:0000008)]
MGI:107545	Art2b	228	0.0323063	248	0.138577	196	2.55233	226	3.04376	[PATO:0000460^OBO_REL:inheres_in(UBERON:0000008)]
MGI:3038477	Fbgl2	229	0.0321336	202	0.141818	110	3.11848	182	4.01266	[GO:0051234]
MGI:3038476	Fbgl1	229	0.0321336	202	0.141818	110	3.11848	182	4.01266	[GO:0051234]
MGI:1891123	Kcne2	231	0.0317993	250	0.138554	128	2.95474	182	4.01266	[GO:0051234]
MGI:2385902	Picalm	232	0.0316133	234	0.139535	173	2.78488	103	5.06133	[UBERON:CL_0000232-CL_0000562-FMA_62845-ZFA_0009256]
MGI:102701	Lilrb4	233	0.0295094	206	0.141593	196	2.55233	226	3.04376	[PATO:0000460^OBO_REL:inheres_in(UBERON:0000008)]
MGI:3045765	Rplag	234	0.0294577	224	0.140426	179	2.707	226	3.04376	[PATO:0000460^OBO_REL:inheres_in(UBERON:0000008)]
MGI:88263	Capn1	234	0.0294577	224	0.140426	225	2.34345	226	3.04376	[PATO:0000460^OBO_REL:inheres_in(UBERON:0000008)]
MGI:1931295	Rab27b	234	0.0294577	224	0.140426	225	2.34345	226	3.04376	[PATO:0000460^OBO_REL:inheres_in(UBERON:0000008)]
MGI:1926943	Atp12a	237	0.0294514	229	0.140351	211	2.46924	222	3.40733	[PATO:0000460^OBO_REL:inheres_in(UBERON:FMA_62970-MA_0002501-MIAA_0000052)]
MGI:1333849	Rasgrp2	238	0.0293983	211	0.141079	225	2.34345	226	3.04376	[PATO:0000460^OBO_REL:inheres_in(UBERON:0000008)]
MGI:1298208	F2rl2	239	0.0292695	222	0.140496	225	2.34345	226	3.04376	[PATO:0000460^OBO_REL:inheres_in(UBERON:0000008)]
MGI:3579880	Drsi	240	0.0292603	128	0.152263	188	2.63533	222	3.40733	[PATO:0000460^OBO_REL:inheres_in(UBERON:FMA_62970-MA_0002501-MIAA_0000052)]
MGI:98940	Vtn	241	0.0291911	245	0.138655	248	1.7758	226	3.04376	[PATO:0000460^OBO_REL:inheres_in(UBERON:0000008)]
MGI:107365	Ube2i	242	0.0279576	198	0.142222	243	1.97701	226	3.04376	[PATO:0000460^OBO_REL:inheres_in(UBERON:0000008)]
MGI:102969	Gcet2	243	0.0278946	163	0.146825	191	2.61001	243	2.95158	[PATO:0001997]
MGI:1346870	Map2k6	244	0.0273206	133	0.151639	240	2.04866	248	2.31854	[PATO:0000001^inheres_in_part_of(UBERON:FMA_9667-MA_0002434-MIAA_0000022-XAO_0000122-ZFA_0005023)]
MGI:3051295	Thyct2	245	0.0258151	157	0.147541	206	2.51427	244	2.71	[PATO:0000586]
MGI:3051294	Thyct1	245	0.0258151	157	0.147541	206	2.51427	244	2.71	[PATO:0000586]
MGI:1354163	Ercc4	247	0.0233614	246	0.138655	250	1.48829	246	2.6285	[UBERON:FBbt_00000020-FMA_9577-MA_0000029-MIAA_0000298]
MGI:3721675	Dss1	248	0.0228351	204	0.141631	246	1.8091	249	2.27946	[PATO:0000070]
MGI:1338798	S100a11	248	0.0228351	204	0.141631	246	1.8091	249	2.27946	[PATO:0000070]
MGI:1289308	Tax1bp1	250	0.0225705	239	0.13913	249	1.54141	247	2.39002	[PATO:0000051^inheres_in_part_of(UBERON:FBbt_00005057-FMA_7161-MA_0000010-MIAA_0000016-XAO_0000100-ZFA_0000010)]
